# Supplementary material for: Comprehensive Analysis of Arabinogalactan Protein-Encoding Genes Reveals the Involvement of Three BrFLA Genes in Pollen Germination in Brassica rapa
Source: MDPI journal article supplement (doi:10.3390/ijms222313142), 2021-12-05
Supplement: s1 [file s1]

**Table S4** The protein backbones of newly identified BrAGPs.

| Gene name      | BRAD locus <sup>a</sup> | Domains | Protein backbones                                                                                                                                                                                                                                                                                                                                                   |
|----------------|-------------------------|---------|---------------------------------------------------------------------------------------------------------------------------------------------------------------------------------------------------------------------------------------------------------------------------------------------------------------------------------------------------------------------|
| <i>BrAGP46</i> | <i>Bra008765</i>        | -       | <u>MAARSSLIRFAFVCIVLAVLVMTAESHNGVNH</u> <b>GPAKSP</b> <u>SSHDPKAH</u> <b>APAP</b> <u>SAATFSAYPO</u><br><u>LIATALVGALS FVF</u>                                                                                                                                                                                                                                       |
| <i>BrAGP47</i> | <i>Bra023457</i>        | -       | <u>MAARSSLVRFAFVCIVLAVLVMTAESHAGHHH</u> <b>GPAMAPGMAP</b> <u>MPHHH</u> <b>TPAPAP</b> <u>SGATFS</u><br><u>AYPQLIATALVGALS FVF</u>                                                                                                                                                                                                                                    |
| <i>BrFLA35</i> | <i>Bra007193</i>        | FAS     | MRRLLIKKNPVFFLFLITSSLTILIFSLRLPD <b>SP</b> <b>PIIFTGKL</b> <b>RADLSDELGFFGNMIIEML</b><br><b>PEDLVFTAFVPSEKAFDRDLGMTKPNNTRKSKSLEDEENTYAVVSRI LGFAVVPYRVEAG</b><br><b>DVGKDETASYESLSGFTLKIWRKSGGLVVNGVETEKMGLKRGKIMVHIMDGVIMD</b> <b>SDF</b><br>AQSVASTD <b>TP</b> QDEE <b>EPKP</b>                                                                                   |
| <i>BrFLA34</i> | <i>Bra018207</i>        | FAS     | <b>MSPPP</b> AGINLTQILING <b>HNFNVALSLLVASGVITEL</b> <b>ENDDHGAGITVFVPTDSAFSDLPENQ</b><br><b>NLQSLPADKKAIVLKFHVLNSYYTLGSLESITNPVNPTLATELMGAGSYTLNISRVNGSIV</b><br><b>TINSGLV LALVTQTAFDQNPVS VFGVSKVLLPKELFPKSGQPVS</b> <b>TP</b> ATT <b>TPP</b> RQVSL <b>SP</b> EG<br>SDDQPSRLV <b>APP</b> GEVVSSSTVKRTRVFFYLCWCIAFWCAFLV                                          |
| <i>BrFLA36</i> | <i>Bra023589</i>        | FAS     | <u>MRAIQTYVTLFFILVIITTTSTGAQK</u> <b>SP</b> <b>HHGNNHDL</b> SIAIEEMEKANYFSFVMLINMLHST<br>NPRLLANI <b>TFLMPRDKPLSRSNIIQQDSISDFLLRHSIPSPLLFEHLNLIPNGSIVPSSLPHYT</b><br><b>LKITNGGRLNYFLNNVKIISRNICSLGSIKCHGIDGILPSP</b> SAIND <b>DS</b> PRDNHT <b>SP</b> FISCPSSH<br>NNSEHD <b>SP</b> HDNSEHD <b>SP</b> LNNSSNHSSRPDDHTHTHV <b>APSP</b> TS <b>SP</b> TLVPKSDSSTIREGDT |

|                  |                  |                                 |                                                                                                                                                                                                                                    |
|------------------|------------------|---------------------------------|------------------------------------------------------------------------------------------------------------------------------------------------------------------------------------------------------------------------------------|
|                  |                  |                                 | <u>SGFVLLGLLSCVMGIAMAM</u>                                                                                                                                                                                                         |
| <i>BrENODL7</i>  | <i>Bra003532</i> | plastocyanin-like (PCNL) domain | MVVVASEGPRVFKVGDEFEWRVPLQNDTSVYSRWANTNRFHIGDSLSFVYDKDSVMEV<br>DKWGFYHCNGSDPITAFDNGNSTFYLDRLPGLFYFISGSNAHCTSGQRLIVEVMHIHHHH<br>NHHDVSLPPSMSPLSASSPSESAFDSHDPASSAAASSLLASFFPPFAALLVALFSCQP                                           |
| <i>BrENODL19</i> | <i>Bra010371</i> | PCNL                            | MGLVKSFDAYLMIVMLTGLVFALGLSNGYKFYVGGKDGWVLTTPSEDYSHWSHRNRFO<br>VNDTLYFKYPKGKDSVLEVSEEEYNTCNTTHPITSLSDGDSLFVLSRSGPFFVSGNSEN<br>LKGQKLAVNVMSTAHHSRSPRQPSPPSPPTLSPIAWSPPAPSPGVVLSDSEALAPAPEPAK<br>ARNSASLVGPGMVSLGLVLVVFIRSMV          |
| <i>BrENODL35</i> | <i>Bra026261</i> | PCNL                            | MGLIKRFDAYLMTVMLMSLGFAGFSNGYKFYVGGRDGWVLTTPSEDYSHWSYRSRFQV<br>NDTLYFKYPKGKDSVLEVSEEEFNICNTTHPITSLTDGDSLYVLSRSGPFFVSGNSEN<br>KGQKLPVKVMSAAHHSHSPRQPSPPSPSPPTLSPSHQALSPPAPSPRVVLSESEALAPAPG<br>PAKAHNSAGLVSPRAVSLGLVLVVIISFVL        |
| <i>BrENODL40</i> | <i>Bra030730</i> | PCNL                            | MSLMVLSLSADAYKNYTVGESKGWFDIQRPSVNYQKWADSKSFSLGDFLIFNTDSNHS<br>VVQTYDYKTYKSCDYNNEEDNSTREWSAAKPSATSPVPVSVKVPLVKEGSNYFFSGNY<br>DGEQCKFGQHFMINVTHGQGLPSPDEDDETAPGPGQSSQSGDDDEVAPDTIVPANFDHP<br>KDIESDDDDSLVKGRKNSSCIAKYNLVLCLVFMGLASFF |
| <i>BrENODL48</i> | <i>Bra036574</i> | PCNL                            | MRVTHAMYRSCNNNSNPSTFTTGNDSVTLTNHGHFFFCGVPGHCMAGQKLDLNVIHPI<br>SSTPLSDPPISSSSSPPSTTTIPAAGVPGPSPSHAASLPAAAAVVYLLVSLIFANSAS                                                                                                           |
| <i>BrENODL52</i> | <i>Bra041119</i> | PCNL                            | MGSNHSSGSGSSPWSGWGPNNNGQNTGSGGSGSGWGWGPKNNTNNSGSGSSGSGWGWG                                                                                                                                                                         |

|                                                              |                  |                             |                                                                                                                                                                                                                                                                                                                                                    |
|--------------------------------------------------------------|------------------|-----------------------------|----------------------------------------------------------------------------------------------------------------------------------------------------------------------------------------------------------------------------------------------------------------------------------------------------------------------------------------------------|
|                                                              |                  |                             | <p>WGS HSKGY NATYN <b>AP</b> RK FIVGG DKE <b>W</b> TYGF NYSDWASKTAPFFLNDILVFKYNPPAPFT<br/> <b>H</b>SVYLFSNPLSYEK <b>CD</b>VKKKGKMIASPKQGAGNGFELVLTKMKPYYIS <b>CG</b> EHDGAH <b>CS</b>N<br/> <b>GT</b> MKFTVMPILARW</p>                                                                                                                             |
| <i>BrUCL4</i>                                                | <i>Bra005941</i> | PCNL                        | <p>MEKTSKKLFIFNLCINFGILVTRRCNATTYFVGDTSG <b>WD</b> ISSDLESWPLGKRFSVGDVLM<br/> <b>F</b>QYSSSH <b>SV</b> YEVAKDNFQSC <b>NT</b> TDPIRTFTNGNTTVALSKPGDRFFV <b>CG</b> NRLH <b>CF</b> AGMRL<br/> QVNVQGN <b>GP</b> SPAPVG <b>AP</b> RA <b>AP</b> AGILQPSSKKNNPATGVASSAAHIGGRGLRGSMNYFVY<br/> LMVFTFPLILYFINN</p>                                         |
| <i>BrUCL7</i>                                                | <i>Bra009259</i> | PCNL                        | <p>MGKTSTILFLFYLCIIFGISVITRCNATTYFVGDTSG <b>WD</b> ISSDLESWTLGKRFSVGDVLMF<br/> <b>Q</b>YSSTH <b>SV</b> YEVAKDNFQSC <b>NS</b> TDPIRTFTNGNTTVALSKPGDRFFL <b>CG</b> NRLH <b>CF</b> AGMRL<br/> QVNVEGN <b>GP</b> SPSPVG <b>AP</b> GA <b>AP</b> VGILQPSSKKNNPPTGVATSS <b>AP</b> HVGGCGGRVSIIVTFVY<br/> LMVFGFPLLWTHILVTTKIRVYSIQCMHTYMYWFDYVKLWFGLV</p> |
| <i>BrSCL2</i>                                                | <i>Bra007734</i> | PCNL                        | <p>MAMG <b>MF</b> GESLASSSLHKFH <b>NV</b> KQVSRRDFLSC <b>N</b>ATSALATYNSGSDTVALKNPGHYFF<br/> <b>LC</b> GFPGH <b>C</b> QAGQKLHVLVVATSTA <b>SP</b> SL <b>SP</b> DL <b>SP</b> APSPSIGS <b>SP</b> SPAQATASDDSAQNGALS<br/> <u>VSLSTAMSGVVVFVVAFNLY</u></p>                                                                                              |
| -<br>(divided into<br>unknown<br>PCNL-contai<br>ning protein | Bra018282        | insufficiently<br>long PCNL | <p><u>MALIKNKSLFASFMI</u> FVALFVGTVHNVGDTKG <b>WT</b> MMGV DYEAWASSRTFQVRDSLIF<br/> <b>EN</b> NKDYHDDKTSV <b>P</b>ASL <b>GP</b> AA <b>AP</b> VPRQVR <b>SP</b> SL <b>SP</b> LPDSTVNN <b>GP</b> RYQKKPSRVPHSA<br/> <u>ASNSSVWIGSYILISLPFFILE</u></p>                                                                                                 |

|                                                            |                  |                                                                   |                                                                                                                                                                                                                                                                                                                                                                                                                                                                                                       |
|------------------------------------------------------------|------------------|-------------------------------------------------------------------|-------------------------------------------------------------------------------------------------------------------------------------------------------------------------------------------------------------------------------------------------------------------------------------------------------------------------------------------------------------------------------------------------------------------------------------------------------------------------------------------------------|
| subfamily)                                                 |                  |                                                                   |                                                                                                                                                                                                                                                                                                                                                                                                                                                                                                       |
| <i>BrENODL53</i><br>(divided into<br>BrENODL<br>subfamily) | <i>Bra025873</i> | PCNL                                                              | <u>MVSSQQRLSFSSSKLVFFFCILSLFSRPSLS</u> ASFLVDGVS <del>V</del> WKTPVVHVGD <del>S</del> VIFR <del>H</del> KYGN<br>DLYIFRTKDAFN <del>V</del> CDFTQATLLTKSNST <del>S</del> FTWYPSRPGSY <del>F</del> SFTNNTSLPK <del>T</del> QLSQKLT<br>VQVLLAAASWPSQPP <del>T</del> PAI <del>A</del> PGPVSEGGDVSS <del>S</del> P <del>S</del> YPWPL <del>G</del> PREGSAL <del>S</del> PGPSPSEITSVT<br>VPGKDGVPFINSNPAVPLPTGEVDST <del>S</del> INPLPTSTNSAHQVM <del>M</del> TVTVKLVLC <del>C</del> VAMFLLL                 |
| <i>BrXYLP1</i>                                             | <i>Bra024265</i> | non-specific<br>lipid transfer<br>protein 2<br>(nsLTP2)<br>domain | MATSFSAA <del>T</del> PFVFILL <del>L</del> SISSVT <del>V</del> HGASH <del>H</del> HTAAPAPAVD <del>C</del> STLIINMAD <del>C</del> LDFVMAGGTS<br>AKPKSS <del>C</del> CAGLKT <del>V</del> LKADA <del>E</del> CEAFKNSAAFGITLNM <del>T</del> KAATLPTA <del>C</del> KLHAPSISN <del>C</del> G<br>LSM <del>T</del> PTM <del>A</del> PG <del>L</del> APGGAVAA <del>G</del> P <del>G</del> AAGTTL <del>A</del> PTPSQ <del>G</del> NDGSS <del>L</del> IPISFTT <del>L</del> FSALFFVL <del>F</del> LSR<br><u>V</u> |
| <i>BrXYLP2</i>                                             | <i>Bra031935</i> | nsLTP2                                                            | MATSFSTLTPFLFILL <del>L</del> SISSVLEA <del>A</del> HHHTAAPAPAVD <del>C</del> SMLILNMAD <del>C</del> LSFVSAGGTEAKP<br>ASS <del>C</del> CNGLKT <del>V</del> LKTDA <del>E</del> CEGFKSSASLGVT <del>L</del> NMTKAATLPA <del>A</del> CKLHAPSMAA <del>C</del> GLS<br>A <del>A</del> PTM <del>A</del> PG <del>L</del> APGGGAVAA <del>G</del> P <del>D</del> LSFL <del>A</del> PNPSPGNHGSSLLPFSFTTILSTMFFVL <del>F</del> LSRV                                                                                |
| <i>BrXYLP3</i>                                             | <i>Bra013135</i> | nsLTP2                                                            | MAPRTMETSILMIFTV <del>V</del> ALMSGERAIAVD <del>C</del> SSLILNMAD <del>C</del> LSFVTNGSTVEKPEGTCCSG<br>LKT <del>V</del> VRS <del>G</del> PE <del>C</del> CEGFKNSASLGVTLDLAKAASLPSA <del>C</del> KVAAPPSAR <del>C</del> GLAVSASPPAS <del>S</del> P<br>EISPTAGAG <del>A</del> PSSSSEANAAT <del>P</del> VPVPAGSSDASLVSVSFAFALFIALISS <del>F</del> Y                                                                                                                                                      |
| <i>BrXYLP4</i>                                             | <i>Bra037870</i> | nsLTP2                                                            | MKQSLLSILIFLLSSSFAPIHARNKSQ <del>P</del> AN <del>S</del> PSSVA <del>A</del> PAPGPSNSD <del>C</del> SSVIYDMMD <del>C</del> LSYITP<br>GSNDTKPTKV <del>C</del> CGGILSVLQYNPT <del>C</del> VGLESSKTMGFAVN <del>N</del> TRARAMPTT <del>C</del> KLPIVAT<br>HCPMLDEV <del>T</del> PAAS <del>T</del> PVSQSAG <del>T</del> PM <del>T</del> SPSSVA <del>S</del> TS <del>S</del> PSLAES <del>P</del> VMT <del>A</del> PS <del>P</del> SSSGTNHLSAS                                                                |

|                 |                  |        |                                                                                                                                                                                                                             |
|-----------------|------------------|--------|-----------------------------------------------------------------------------------------------------------------------------------------------------------------------------------------------------------------------------|
|                 |                  |        | <u>TLTLVVIKVSFVAYISFFFSN</u>                                                                                                                                                                                                |
| <i>BrXYLP5</i>  | <i>Bra000652</i> | nsLTP2 | MSPSPVATPAPGPSNSDCSSVIYGMMDCLSYITPGSNDTIPTKVCCGGILSVLQYNPKCVC<br>VGLASSKDMGIEINSTRAHSMPTTCKLPAAAPHCAIPGASAPGASTPVSPSAGTPMTSPSS<br>DESPTSPSSDESPSSSLAESPGMTAPSPSSSGTNQLSVSTLTFLAIIVSSITYILGFSN                               |
| <i>BrXYLP6</i>  | <i>Bra028639</i> | nsLTP2 | MALFSAALPLL <del>LL</del> FLFVSSLSVNGNTAQSVESAMIMTLTKCLPFVTIGSQVEKPETACCS<br>VIKTVLDTKAECLCEGLKSSAAAGINLNLTKAGTLPDACLKAPPMPACALFAKPPASAP<br>APVPAARPLNGSGPGSNSAPAPSPSHSNHGSSISVLSLAISGALVIMFTRI                             |
| <i>BrXYLP7</i>  | Bra037988        | nsLTP2 | MEQSTRSLIITIVITSMVLVGFGSSDLDQDREECTNQLVVLSPCLTYVGGNAKAPTKDCCG<br>GFGQVITQSQKCVGILVKDKDDPNLGLKFNASLAAHLPTACHITAPNITKQISLLHLSPNS<br>TLAREFESLGRLEASANSAPPLQNVKDGAGGGKAESVKSDGGKKKKSWLAVELLIFALF<br>SHLLLVISSFTSSSFI           |
| <i>BrXYLP8</i>  | <i>Bra004824</i> | nsLTP2 | MESWRISLVAIAIALLMATLVSAGEDKAKDKEECTEQLVGMATCLPYVQGQAKTPTPDC<br>CSGLKQVLKSDKKCLCVIIQDRNDPDLGLQINVSALALPSVCHAVADVTKCPALLHMD<br>PKSQEAQVFYQLANGLNKTGPASASTISAPAPTSVSPTAGSEDGNNSGRATSLPSKNHAQ<br><u>SFRKPWLVLVAAHLFIISFTITL</u> |
| <i>BrXYLP9</i>  | Bra036905        | nsLTP2 | MSTVSAQSTCTNVLISMAPCLGYITGNSSSPSQCCSQLAHVLRSSGECLEVLKGGGPR<br>LGINFNKTQALALPKACNVQTPPVSLCNDSSVKSPGSPNTSEHGNGSKTVPGHRSTSR<br>GSSIKVSFSLAVLSAVSYIINYSRY                                                                       |
| <i>BrXYLP10</i> | Bra021454        | nsLTP2 | MGYTSIYAITFVALVGALLGVSKAQPSGSCVSTLTTLSPCLGYITGNSTTPSQTCCSQLDS                                                                                                                                                               |

|                 |                  |        |                                                                                                                                                                                                                                                                                                                                                                                                                               |
|-----------------|------------------|--------|-------------------------------------------------------------------------------------------------------------------------------------------------------------------------------------------------------------------------------------------------------------------------------------------------------------------------------------------------------------------------------------------------------------------------------|
|                 |                  |        | VIKSSPQCICSAVNSPIPNIGLNINRTQALQLPNACNIQAPPLSQCNVATGPTTFLGALSPVE<br>SPADKNPGVALTPTSSPGARSGVVVGARGGSKTIPSTGAGSSSGSVDRVPPHLFIFICEFY<br>FKEENDLSDLVSCVLRVGIKCCKGCQTNAKRKLLSVSGVSAVEYNAEQGLLRVSGDNP<br>AKLLRKLAKWDKNAELVSLPGEVSAPAPRTTPQLYQTKRMGKRTPKCFLLRFCGTKEKV<br>EPYGVAGDENGSA <sup>TP</sup> FINTV <sup>APP</sup> MVYPPPPQPT <sup>TP</sup> GFAT <sup>TP</sup> IPYPPPCFGANQPPYTYTSGGMY<br>Q <sup>SPPP</sup> TFQLRKTQFPQMVNYPHH |
| <i>BrXYLP11</i> | <i>Bra040833</i> | nsLTP2 | <u>MKMGMGLMLLTVM</u> <u>AVMSSTRVLAQSTCT</u> <u>SALISMSPCLNYITGNTTTPSQQCCSQLG</u><br><u>NVVRSSPDCLCQVLNNGGSQLGINVNQTQALALPRACNVQTPPVSR</u> <u>CNNGGGSTADSP</u><br>AD <sup>SP</sup> NSS <sup>GP</sup> GNGSKTVPVGEGE <sup>GP</sup> <u>SSDGSSIKFSYPLLAFLSVASYMAIFLKY</u>                                                                                                                                                          |
| <i>BrXYLP12</i> | <i>Bra023817</i> | nsLTP2 | <u>MKMGRVLVLLTVFMAVMSSTRVSAQSSCT</u> <u>TALISMSPCLNYITGNTTSPSQQCCSQLGNV</u><br><u>VRSSPDCLCQALNNGGSQLGINVNQTQALALPRACNVQTPPVSG</u> <u>CNNGGGSTADSP</u> <u>TDS</u><br><sup>P</sup> NSS <sup>GP</sup> GNGSKTVPVGE <sup>GP</sup> GDG <sup>S</sup> FS <sup>D</sup> <u>GSSIEISYRLLTFLSVASYIAIFLKY</u>                                                                                                                              |
| <i>BrXYLP13</i> | <i>Bra001874</i> | nsLTP2 | <u>MKTGMGLMFLTIFMAVMSSTRVSAQSSCT</u> <u>SVLISMAPCLNYITGNTTSPSQQCCSQLSSV</u><br><u>VQSSPDCLCQALNNGGRSQLGLNINQTQALALPRACNVQTPPISR</u> <u>CNNGGGSNADSP</u> <u>ADSP</u><br>KSS <sup>GP</sup> GNGSKTVPVGE <sup>GP</sup> GDG <sup>S</sup> SS <sup>D</sup> <u>GSSIKFSYPLLAFLIAASYMAVFLKY</u>                                                                                                                                         |
| <i>BrXYLP14</i> | <i>Bra018473</i> | nsLTP2 | <u>MAQTTTVIFILATLLVPATVVSQTTPSPVPAPSPTINEAMNCAAGLTVCLPAFAQGGTPSK</u><br><u>ECC</u> <u>TAVKTQQSCLCGFIKAPVLVVPFNITAFSALISKSCGINTNLNLCSE</u> <u>T</u> <u>PAQA</u> <u>PLPHMTA</u> <sup>A</sup><br><sup>Y</sup> PPSG <sup>AP</sup> KTDKDAASKPAETGLVGIVLIMISALFY                                                                                                                                                                    |
| <i>BrXYLP15</i> | <i>Bra025919</i> | nsLTP2 | <u>MEVVRF</u> <u>AVAVFVLFVSSSKA</u> <u>EPTPAMGGGGGGGGDAHSMPCIQKLMPCQPYLHSVTP</u><br><u>PPPASCCLPMKEIVEKDATCLCSVFNNVDM</u> <u>LKSLNLTKENALVLPKACGAKADISLCKSS</u>                                                                                                                                                                                                                                                               |

|                 |                  |        |                                                                                                                                                                                                                 |
|-----------------|------------------|--------|-----------------------------------------------------------------------------------------------------------------------------------------------------------------------------------------------------------------|
|                 |                  |        | NGTTTPSTGTTTTPPASSTGSGSTGASSSTDKPTNSAPAINFAGASFASAFMALATIFF                                                                                                                                                     |
| <i>BrXYLP16</i> | <i>Bra016563</i> | nsLTP2 | MEILKFAVIFVLCSISSNAATTPPSGGAGDAHSMPCIQKLMPQPYLRSVTPPPASCCM<br>PLKEIVETDVNCLCSVFNNVDMLKSLNLTKENALVLPKACGANADVSQCKASTGTTTPS<br>TSPGTTKTPPASPAESGSTGGSASSTAKPSDSAPAINFSGISFAAAFVALATIFF                            |
| <i>BrXYLP17</i> | <i>Bra031024</i> | nsLTP2 | MEIVRFTVAVFFVLYSVSSSNAATAPPSGGGGGGGDAQAMPQIQKLMPQPFLLHSVIPPPP<br>PSCCLPLKAIVANDATCLCSVFNNVDMLKSLNLTKDNALDLPKACGANPDISLCKASPA<br>GGTTTNSTSPATPKTPPVSSSTGSGSTGASSSTTSPSTSSAPAINFAGLSFASTIVALATTF                  |
| <i>BrXYLP18</i> | <i>Bra031023</i> | nsLTP2 | MKIVRFTVAVFFVLYSVSSSNAAVAPPSGGGGGGGDARALPCIQKLKSCOPYLHSVIPPLP<br>ASCCLSMKEMVANDAPCLCSVFNNVDMLKSLNLTRDNALDIPKACDAEPDISLCKASPA<br>DGP TTNSTSSTPSTSSAPAINFAGLSFASTIVALATTF                                         |
| <i>BrXYLP19</i> | <i>Bra031022</i> | nsLTP2 | MEIVRFAVAVFFVLYSVSSSNAAIAPPSGGGGGGGDAQEMPQIQKLMPQPFLLHSVIPPP<br>PPSCCLPMKAIVANDATCLCSVFNNVDMLKSLNLTKDNALDLPKACGANPDISLCKASP<br>AGGTTTNSTSPATPKTPPVSSSTGDFHCGTTGASASSTSTPTSSAPAINFAGLSFASTIVALAA<br>TFF          |
| <i>BrXYLP20</i> | <i>Bra015955</i> | nsLTP2 | MASSILFITLLISLSSISLQLVFAQVPGTTTATCSSMLLSLAPCGPFVQGFVQLPAQPCCDGL<br>NQIYSQQPTCLCLFLNNTSTLSPAFFINQTLALQLPPLCNVPANASSCSSPGGEAPSDSSSV<br>APPPSSSTSSPVSPSAKNNSSVAGTPVAQLAPRPTSLMGLGYDLRSSGSKSKIQLIILALAVI<br>LPGTLFI |
| <i>BrXYLP21</i> | <i>Bra032857</i> | nsLTP2 | MKDLHFHIFLVTMTVIASISAATPTAPAAGGALSDECNQDFQKVTLCLDFATGKAPTPSK                                                                                                                                                    |

|                 |                  |        |                                                                                                                                                                                                                                                                                                                                                                |
|-----------------|------------------|--------|----------------------------------------------------------------------------------------------------------------------------------------------------------------------------------------------------------------------------------------------------------------------------------------------------------------------------------------------------------------|
|                 |                  |        | <p>KCCDAIEDIKEKDPKCLCYVIQQAKTGGQALKDLGVQEAKLIQLPTACQLRNASISNCPK<br/> LLGI<del>SPSS</del>DAAVFTSNATTIT<del>TE</del><del>AP</del>AGK<del>SP</del><del>AT</del>PATSSEKGGSSASIRDGHAVVALAITLITVSE<br/> <u>VSTLL</u></p>                                                                                                                                             |
| <i>BrXYLP22</i> | <i>Bra010912</i> | nsLTP2 | <p>MKGLYFHLFLVTMTVVASISAATPAAPSGGGSLLDECSKDIQTVSLCLDFASGKAPNPSK<br/> KCCDAIEDIKEKDPKCLCFVIQQAQSGGQTLKDLGVQEAKLIQLPTSQQLHNASISNCPK<br/> LLGI<del>SPSS</del>AAAIFTSNATSTTT<del>TA</del><del>AP</del>GGT<del>SP</del><del>AT</del>PATSSEKGGSSASIKDGHAVMLLAVALMSI<br/> <u>SFLSTLPWMGLA</u></p>                                                                     |
| <i>BrXYLP23</i> | <i>Bra021455</i> | nsLTP2 | <p>MSSLILGGKGQQIISTPCTSSMISTFTPCLNFITGSSGGSVTPTAGCCDSLKSLTSTGMNCA<br/> CLILTANVPLPTGFINRTLSLALPRACKMTGVPVQCAAG<del>TPLP</del><del>APGP</del>VPFLL<del>APPPP</del>MSA<br/> F<del>SP</del>GSSKAAAT<del>AP</del>GL<del>AP</del>D<del>AP</del>LD<del>GPM</del><del>GPT</del><del>AT</del>PGIRPVVQPLQPTSLAQYST<del>SP</del>FLPLLFFLFT<br/> LLTLLNL</p>              |
| <i>BrXYLP24</i> | <i>Bra023816</i> | nsLTP2 | <p>MSKISGITIVLVALIAVLAFPVRSQQPPLSQCTPSMMTTVGPCMSILTNSSTNGTSPSSDCC<br/> NSLKSLLTTGGMGCLCLIVTGSVFPNIPINRTTAVSLPRACNMPRVPLQCKANI<del>APAA</del><del>APGP</del><br/> ASTF<del>GPAM</del><del>SPGP</del><del>AT</del>PLVPEPT<del>TA</del>AAQ<del>TP</del>QSVTTRPFT<del>TP</del>TADGA<del>AP</del>TADNGGSTSRPSL<del>TPSS</del><br/> <u>AYALSPSLLFFGISLVALKFY</u></p> |
| <i>BrXYLP25</i> | <i>Bra001875</i> | nsLTP2 | <p>MSKIPVITIAVALLAVLALPVRSSQQPPLSQCTPSMMTTVGPCMSILTNSSTNGTSPSSDCCN<br/> SLRSLTTGGMGCLCLIVTGSVFPNIPINRTTAVSLPRACNMPRVPLQCNANI<del>APAA</del><del>APGA</del><br/> GTF<del>GPAM</del><del>SPSP</del><del>AT</del>PIVPEPT<del>TA</del>AAQ<del>TP</del>QSDTTRPFT<del>TP</del>VDGA<del>AP</del>PTSDDGGNTRPSV<del>TPSSS</del><br/> <u>YALSPSLLFLVVSLVALKFY</u></p>    |



|                 |                  |        |                                                                                                                                                                                                                                                                                                   |
|-----------------|------------------|--------|---------------------------------------------------------------------------------------------------------------------------------------------------------------------------------------------------------------------------------------------------------------------------------------------------|
| <i>BrXYLP26</i> | <i>Bra015426</i> | nsLTP2 | MDPRFCLISALIFLSLLSNSPILILAQISTPCSPTMLSSVTGCMMSFLTGGGSSPTSDCCEALK<br>SLTGTGLDCLCLIVTASVPINIPINRTLAISLPACGMPGVVPVKCKASAAPLPAPGPVSLGP<br>TTPPTETQSPQGSASF <del>GPTT</del> SPASSIIPDDQNIPASDKGENPTASTPSASSPSSSHSIKLPLLLL<br><u>TFFAFQIISLLLS</u>                                                      |
| <i>BrXYLP27</i> | <i>Bra032462</i> | nsLTP2 | MDPKSFLISALIFSLSNSPVLMSLAQINTPCSPTMLSSVTGCMMSFLTGGATSTTSDCCRAL<br>KTLTGTSMDCLCMIVTANVPLDLPINRTLAISLPACGVPVQCKASSALLYSPGPASV <del>GPT</del><br>TSPPTETQNPEGSASF <del>GPTAT</del> SPTSSMDPDGMPDGKAHIFNT                                                                                             |
| <i>BrXYLP28</i> | <i>Bra039713</i> | nsLTP2 | MAATIVFILMLAITSSTAVAETQGPSSSPAPTSEELVMFSPCIPYVSAPPNNISKTPDALC<br>CSVFSTSVHSAAGKCLCYLLRQPMILGFPLDRSRLLSLSQICTEFQSSDESFE <del>SLCSPSVSP</del><br>ELPPLQSIQFT <del>SP</del> FDYGDRDSA <del>SP</del> QSLGLPPETAKDPPISDQF <del>SP</del> DIDNV <del>SP</del> QLIINGSPMIS<br><u>NLLFLTTIIMTLATCILTRI</u> |
| <i>BrXYLP29</i> | <i>Bra025907</i> | nsLTP2 | MASSSVFITVLISLVPVFLQPGLAQGQSPPASCSALLLALAPCGPFVQGFVQFPAQPCCSSL<br>SQIYSQQPTCLCLFLNNNSTLSSAFFINQTLALKLPQLCSIPANSSVCSGASTASPPSTNST<br>GSQVSMGAKNNSVAAATPVAQVAPKPSNMMGLGDGLRSSGPTFKIQVTIFVIAAILAGTL<br><u>FLV</u>                                                                                    |
| <i>BrXYLP30</i> | <i>Bra040823</i> | nsLTP2 | MKQSLILSILILLSSSFAQIHARNKSHPANPPSPVATPAPGPSNSDCSSVIFDMMDCLSYLTP<br>GSNDTTPTKVCCGGILSVLQYNPKCVQIGLASSKDMGIALNNTRALAMPTICKLPAAAPH<br>CAILDASRPSASTPGMSSVSPSAVTPMTQSSAQSPTFSPSLPESPGITAPSPSSSGTNHLSV<br><u>SKFTFVAVVVSITYISAFSN</u>                                                                  |

|                 |                  |        |                                                                                                                                                                                                                                                                                                                                                                                       |
|-----------------|------------------|--------|---------------------------------------------------------------------------------------------------------------------------------------------------------------------------------------------------------------------------------------------------------------------------------------------------------------------------------------------------------------------------------------|
| <i>BrXYLP31</i> | <i>Bra021349</i> | nsLTP2 | MTNVAVIAAILITVLLSASVSEQMAPSPSSGSPSGAPDCMTNLLNMTDCLSYVQVGNNGG<br>AANPDKACCP <del>ELAGLVDSSPQCLCYLLGGDMAAQYG</del> IKIDKAKALKLPGVCGVVTPDP<br>SLCSLFGIAVG <del>AP</del> EAMGKEEA <del>SPAFAP</del> SSGAE <del>SP</del> EGLGS <del>GP</del> SASRTSDAPNTPYSLFLSVIII<br><u>PLAFAFHLYS</u>                                                                                                   |
| <i>BrXYLP32</i> | <i>Bra014833</i> | nsLTP2 | MKQSLISILILLSSSFAPIHARNKPQPAK <del>SPSP</del> VAAL <del>AP</del> GPSNSDC <del>SSIYDMMDCLSYLTP</del><br>GSNDTKPTKVCCGGILSVLQYNPKCICVGLESSKTMGFAVNNT <del>RARAMPTTCKLTIVAPH</del><br>CAILDEAT <del>PA</del> ASIAV <del>TP</del> SAG <del>TPMT</del> SPSSGG <del>SPTSAP</del> SLAE <del>SPVMTAP</del> SPSRSGTNHLSVSTL<br><u>TLVSVIVSSVTYISFLF</u>                                        |
| <i>BrXYLP33</i> | <i>Bra037069</i> | nsLTP2 | MAATSNNAVVLIVILA <del>ITFSSSSAVTETQAPSPPALTC</del> TEELVMFSPCLPYVSAPPNNISDAP<br>DPLCCSAFSTSVNSGAGNCLCYLLRQPMILGFPLDRSRLLSLQIC <del>DLSSDES</del> FESIC <del>SPS</del><br>E <del>SP</del> ELPPLQSIQFT <del>AP</del> FVYGDKASAS <del>SP</del> SFAISREAAGIS <del>PT</del> SDQPS <del>P</del> ETDSLSS <del>TP</del> ESIINGSP<br><u>KITSFCFLSTIIMTLPTFDLFLAL</u>                           |
| <i>BrCAGP1</i>  | <i>Bra030067</i> | nsLTP2 | MKGLHFHLFLVTMTVVVSVSAATPAAPAAGGALADECSQDFQKVTLCLDFATGKAPNP<br>SKKCCDAIEDTKERDPKCLCYVIQQAKTGGQALKDLGAKKINSFNQLLASSTTLASPT<br>VQEMHVVDYGF <del>EFLGI</del> <del>SPSSP</del> DAAVFTSNATSTT <del>TPAAPAGKSPATPT</del> TSMGTGGSPSIRD<br><u>GHATVALAFALIMTVSEFVSILPRMGLA</u>                                                                                                                |
| <i>BrCAGP2</i>  | <i>Bra039574</i> | nsLTP2 | MKHLVVLNSVLLLLSCDAAVFM <del>SPSE</del> <del>SP</del> VFS <del>PSSEPSNND</del> STVVYGMFDCLSFLT <del>VGST</del><br>DLSPTKTCC <del>EGIKIVLEYNSSCL</del> CIALESSRAIGFDLINNRALAMPSTCNIPIDPHFV <del>SP</del> SKP<br>PTTTLSSGSSTSITTT <del>SPSVS</del> <del>SP</del> ASSHSSAAKPGSS <del>PT</del> THQ <del>SP</del> P <del>TLAAQSP</del> AMF <del>APSP</del> SEYGME<br>NMSLSKLFIIIMMISSFVYLLA |

|                |                  |                                                          |                                                                                                                                                                                                                                                                                                                                                                                                                                                                                                                                                                                                                                                                                                               |
|----------------|------------------|----------------------------------------------------------|---------------------------------------------------------------------------------------------------------------------------------------------------------------------------------------------------------------------------------------------------------------------------------------------------------------------------------------------------------------------------------------------------------------------------------------------------------------------------------------------------------------------------------------------------------------------------------------------------------------------------------------------------------------------------------------------------------------|
| <i>BrCAGP3</i> | <i>Bra021876</i> | Pollen proteins<br>Ole e I like<br>(POeI-like)<br>domain | <u>MGFIGKSVLLTLIALCCFTSSVFSTIAQVPPVKLI</u> <b>ITPL</b> <b>TL</b> <b>PPTK</b> <b>API</b> <b>IKVPTFPPAK</b> <b>API</b> <b>IKVPT</b><br>LPPAK <b>API</b> <b>KPPV</b> <b>VLPPV</b> <b>SPP</b> <b>KFNRTLVA</b> <b>VRGVVFCKACKYAGVNNLQGA</b> <b>KPVKGAVVRL</b><br><b>LCKNKKNATSEATTDKNGYFLLYAPKTVSNYAIRNCRAYLVKSPDAKCSKVSKLHGGYL</b><br><b>GSFLKPVVKPEN</b> <u>NATIIFNKLKYSLEFNVGPFAFEPVCPK</u>                                                                                                                                                                                                                                                                                                                     |
| <i>BrCAGP4</i> | <i>Bra032889</i> | POeI-like                                                | <u>MGFLGKSILSSLLAIWFFTSCAFTEEVNHVNQ</u> <b>TPSS</b> <b>APAPSP</b> <b>YHHGHHHPHPPHHHPHPPH</b><br>HPPAK <b>AP</b> <b>VKPPV</b> <b>SPP</b> <b>SKPPVKPPVYPPTK</b> <b>SP</b> <b>VKPPTKPPVKPPV</b> <b>SPP</b> <b>AKPPVKPPVYPPTK</b><br><b>AP</b> <b>VKPPVKPPVKPPV</b> <b>SPP</b> <b>AKPPIKPPV</b> <b>SPP</b> <b>AKPPVKPPVYPPTK</b> <b>AP</b> <b>VKPPTK</b> <b>AP</b> <b>AKPPV</b> <b>SPP</b><br>AKPPV <b>SPP</b> <b>AKPPVKPPVYP</b> <b>PKFNRSLIA</b> <b>VQGTVFCKSCQYASFDSLIGAKPVEGAVVRLLC</b><br><b>KSKKNIVAETKTDKNGYFLLLGPKTVTNYGFRGCRVYLVKSKDYKCNKVSKLFGGDVG</b><br>AVLKPEKRKGK <u>SAVVINQLIYGIFENVGPFAFDPVCPK</u>                                                                                                |
| <i>BrCAGP5</i> | <i>Bra030083</i> | POeI-like                                                | <u>MGFLGKSVLVSLIALWCFTSSAFTEEVNHVTQ</u> <b>TPSS</b> <b>APAPAP</b> <b>YHHGHHHPHPPHPPHHPHPPH</b><br>HPPAK <b>AP</b> <b>VKPPV</b> <b>SPP</b> <b>AKPPVKPPVYP</b> <b>PAK</b> <b>AP</b> <b>VKPPTKPPVKPPV</b> <b>SPP</b> <b>AKPPVKPPVYPPTK</b><br><b>AP</b> <b>VKPPVKPPVKPPV</b> <b>SPP</b> <b>AKPPVKPPVYPPTK</b> <b>AP</b> <b>TKPPTKPPVKPPV</b> <b>SPP</b> <b>AKPPVKPPVYP</b><br>PKFNRSLV <b>VQGTVFCKSCKYASYDSL</b> <b>TGAKPVEGAKVRLVCKSKKNIVAETETDKNGY</b><br><b>FLLAPKTVTNFGFRGC</b> <b>RAYLVKSKDYKCNKVSKLFGGDVG</b> <b>AVLKPVK</b> <b>TP</b> <b>GKSSV</b> <b>VINK</b><br><u>LTYGVENVGPFADPVPCK</u>                                                                                                               |
| <i>BrCAGP6</i> | <i>Bra003506</i> | POeI-like                                                | <u>MAVTRAALAICFLLSLATIADYY</u> <b>SPS</b> <b>TPP</b> <b>VY</b> <b>TPP</b> <b>AYKPTHPPP</b> <b>VYTRPVHKPTLPPP</b> <b>VYT</b><br><b>TP</b> <b>AHKPTLPPP</b> <b>VY</b> <b>TPP</b> <b>TYKPTLPPP</b> <b>VY</b> <b>TPP</b> <b>TYKPKPTLPPP</b> <b>VYKPTL</b> <b>SPP</b> <b>VYTKPTIPPP</b> <b>VY</b><br><b>TPP</b> <b>VYKPTL</b> <b>SPP</b> <b>VYTKPTLPPP</b> <b>VY</b> <b>TPP</b> <b>AYKPTLPPP</b> <b>VY</b> <b>TPP</b> <b>VYKPTL</b> <b>SPP</b> <b>VYKPTL</b> <b>SPP</b> <b>VYK</b><br>KYTSYSHT <b>TP</b> <b>YVPKPTY</b> <b>TPP</b> <b>TKPYVPEILKV</b> <b>VDGIILCKNGYETYP</b> <b>IQGAKAKIVCSEPGS</b><br><b>YGQSKKDVVIYS</b> <b>DP</b> <b>TD</b> <b>SKGYFHVSLTSIKDLLHCRVKLYTSPVET</b> <b>CNNPTNVNKGLTG</b> <b>VP</b> |



|                 |           |                                      |                                                                                                                                                                                                                                                                                                                                                                                                                                                                                                                                                                                                                                                                            |
|-----------------|-----------|--------------------------------------|----------------------------------------------------------------------------------------------------------------------------------------------------------------------------------------------------------------------------------------------------------------------------------------------------------------------------------------------------------------------------------------------------------------------------------------------------------------------------------------------------------------------------------------------------------------------------------------------------------------------------------------------------------------------------|
| <i>BrCAGP10</i> | Bra033328 | glycosyl<br>hydrolase<br>domain (GH) | <u>MLVSSYTRNHILFFIALILTLTSLTESRYHHHKEKHKHNSHNHHSSKPEPPSSSISQPP</u> <u>TPPP</u><br><u>GPND</u> <u>SPSP</u> <u>SLPP</u> <u>SP</u> SDEPEEDNNGFYNVKRFKFGAVGDGVTDDEAFKTAWDSS <u>CSNQNDT</u><br><u>VSVLFVPYGYTFMIHSTIFTGPCHSYQILQVDGTIITPDGPESWPSNISKRQWLVFYRVNG</u><br><u>MALKGAGVIDGRGQKWWDLPCPKPHRSVNKSAIFAGPCDSPIALRFFMSSNLTVEGLMIK</u><br><u>NSPQFNFRFDGCQGVHVESLHITAPPLSPNTDGIHIENSNSVTIYNSVISNGDDCVSIGSGS</u><br><u>YDVDIRNLTCGPGGHGISIGSLGNHNSHACVSNITVRDSIIKYS DN G VRIKTWQGGSGSV</u><br><u>SGVTFNNIHVESVRNPIIIDQYYCMTKDCSNKTS AV F VSDIAYQGIGTYDIRSPPMHFGC</u><br><u>SDAIPCTNLTLSGIELLPAKGDIV</u> <u>LDPFCWNAYGLAEELSIPPVWCPMSDPPTALPGALVD</u><br><u>KCG</u> <u>SP</u> |
| <i>BrCAGP11</i> | Bra032600 | GH                                   | <u>MLISSYTRNQILCFIALIITLSSLTESRYHHHKEKHKHNSHNHHSSKPEPPSSSISQPP</u> <u>TPPP</u><br><u>GPDD</u> <u>SPSP</u> <u>SLPP</u> <u>SP</u> SDDPEEDDNGVYDVRKFGAVGDGVADDTEAFKTAWDSS <u>CSNGNDT</u><br><u>VSVLLVPYGYTFMIQSTIFTGPCHSYQLFQVDGTIVTPDGPESWPSNISKRQWLVFYRVN</u><br><u>GMALKGAGVIDGRGQKWWDLPCPKHRTVNISAIVAGPCDSPIALRFFMSSNLTVEGLQI</u><br><u>KNSPQFHFRFDGCQGVHVESLHITAPPLSPNTDGIHIENSNSVTIYNSVISNGDDCVSIGSG</u><br><u>SYDVDIRNLTCGPGGHGISIGSLGNHNSHACVSNITVRDSVIKYSDNGVRIKTWQGGFGS</u><br><u>VSGVTFNNIHVESVRNPIIIDQYYCMTKDCANKTS AV F VSDITYQGIGTYDIRSPPMHFG</u><br><u>CSDAVPCTNLTLSGIELLPEKGEIVV</u> <u>DPFCWNAYGIVEELSIPPVWCLMSDPPTALQGALV</u><br><u>DKCGSP</u>              |
| <i>BrCAGP12</i> | Bra011100 | GH and X8                            | <u>MSERLKLILWICLSILAFLDFGGAASK</u> <u>IGICYGRNADNLPTPNKVSELIQHNLNIKFVRIYDA</u><br><u>NIDVLKAFANTGIELMIGVPNADLLAFAQFQSNVDTWLHNNILPYPPTTKITSISVGLEVT</u><br><u>EAPDNATGLLLPAMRNIHTALKKSGLDKKIKISSSHSLAVLSRSFPSPSATFSKKHLPFLKP</u>                                                                                                                                                                                                                                                                                                                                                                                                                                            |

|                 |                  |                                                        |                                                                                                                                                                                                                                                                                                                                                                                                                                                                                                                                                                                                             |
|-----------------|------------------|--------------------------------------------------------|-------------------------------------------------------------------------------------------------------------------------------------------------------------------------------------------------------------------------------------------------------------------------------------------------------------------------------------------------------------------------------------------------------------------------------------------------------------------------------------------------------------------------------------------------------------------------------------------------------------|
|                 |                  |                                                        | <p>MLEFLVENESPFMIDLYPYAYRDSSEKLD AIYFALTAMNFKTVKVMVTESGWPSRGSP<br/> KETAATPDNALAYNTNLIRHVVGDPGTPAKPGEEIDVYLFSLFNENRKP GIESERNWGMF<br/> YANGTSVYALDF TGESSVPVSPSNSSTTSPGPSSSPGNSTVIIIGGGGGGARKKWCVASSQAS<br/> VTELQTALDWACGPGSVDCSAVQPDQPCFEPDTVL SHASYAFNTYYQQSGANSSDCSFG<br/> GVSV EVDKDPSYGNCLYMIAPSTDGMNRTMAGNITGNITAI DSPMA SPSSSDGYRQMV<br/> VSVAVSVLLPLFVVSLSLW</p>                                                                                                                                                                                                                                   |
| <i>BrCAGP13</i> | Bra010330        | GH and X8                                              | <p>MSLFKTVAELGAASNIGICYGRNADNLPSNPKVSELIQH LNIKFVRIYDYNIDVLKAFANT<br/> NIELMIGVPNADLLAFAQFQSNVDTWLRNNILPYYPTTKITSISVGLEVTEAPDNATGLVL<br/> PAMQNIHTALKKAGLDKKIKISSSHSLAILSRSFPPSSATFSKKHSAFLKPMLEFLVENDSP<br/> FMIDLYPYAYRDSA EK VQLEYALFESSSQVVDPATGLLYSNMFDAQLDAVYFALTAMN<br/> FKSVKVMVTESGWPSK GSPKETAATPDNALAYNTNLIRHVIGDPGTPAKPGEEIDVYLFS<br/> LFNENRKP GMESERNWGMFYANGTSVYALDF TGESAVP GPVSPSNSSTTGVSPSPGDNGN<br/> STVTIGGGGGGAKKWCVASSQASVTELQSALDWACGPGNVDCSAVQPNQPCFEPDTVL<br/> SHASYAFNTYYQQSGGSSLDCSFGGVSV EVDKDPSYGNCLYMIAPSTDGMNRTMAGNI<br/> TGNITAI DSPLASPSTSNEGIRQMVVSVAVSALLPCFVVSLSLLW</p> |
| <i>BrCAGP14</i> | <i>Bra000732</i> | GH and<br>carbohydrate<br>binding<br>domain<br>(CBM49) | <p>MHPCKVLI SWDVKYAGVQTLVAKILMQGKAGEHTAVFERYQEKA EQFMCSMLGKSTK<br/> NIQKTPGGLIFRQRWNNMQFVTSASFLAAVYS DYLSSSKRNL RCSQGNVSPS QL LDFS KS<br/> QVDYILGDNPRGTSYMGYGHNYPRQVHHRGSSIVSYKVDQKFVTCRGGYATWYSRK<br/> ASDPNVLTGALVGGPDAYDNFADNRDNYEQTEPTTYNNAPLLGV LARLIS GP TGFDQRL<br/> PGV SPTSP VIIKP APIPKRKPT TPPAPAS SPSPITISQKMTSSWINEGKVYYRYSTKL TNRS<br/> KRLK NLKISITKLYGPIWGVTKTGNSYGFPSWMKSLPAGKSMEFVYIHS AAPANVLVSN</p>                                                                                                                                                                                    |

|                 |                  |                    |                                                                                                                                                                                                                                                                                                                                                                                                                                                                                                                                                                                                                                                                                      |
|-----------------|------------------|--------------------|--------------------------------------------------------------------------------------------------------------------------------------------------------------------------------------------------------------------------------------------------------------------------------------------------------------------------------------------------------------------------------------------------------------------------------------------------------------------------------------------------------------------------------------------------------------------------------------------------------------------------------------------------------------------------------------|
|                 |                  |                    | YSLE                                                                                                                                                                                                                                                                                                                                                                                                                                                                                                                                                                                                                                                                                 |
| <i>BrCAGP15</i> | <i>Bra001454</i> | GH and STAS domain | <u>MKTYLLLLLIFSLLLSYSSG</u> QQCGRQAQGALCPNGLCCSEYGWCGTTEAYCGRGCQSQ<br>C <u>TP</u> <u>TPP</u> <u>TPT</u> <u>TPP</u> <u>SP</u> <u>TPP</u> <u>RP</u> <u>TPP</u> <u>GP</u> SGDLSG <u>IISRDQFYKMLKHMNDNACPARGFFTYDAFI</u><br><u>TAAKFFPSFGNTGDLATRKKEIAAFFGQTSHETTGGWTDAPDGANTWGYCFKDEIGKSN</u><br><u>PYCDSNNLEWPCAPGQFY YGRGPMMLSWN YNYGQCGRDLGLDLLRRPAIASSDPVIAF</u><br><u>ETAIWFWMTPQAPKPSCHDVITDQWQPSAADISAGRLPGYGVITNIINGGLECAGRNV</u><br><u>QVEDRISFYTRYCGMFGVDPGTV</u> <u>LGRLPGTTVYRNMKQ</u> <u>YPEAYTYNGIVIVRVDAPIYF</u><br><u>ANISYIKDSCH</u> <u>IHRLKRRGSLERTLAVSNPNKEVLLTLARSGIVELIGKEWYFVRVHDAVQ</u><br>VCLHYVESKNQ <u>TP</u> TNVEESSSSSLWRRCNANKNSSHTEVEPD SKLV LKEPLL FNDK |
| <i>BrCAGP16</i> | Bra038726        | GH                 | <u>MKSLLLLLLNFLFLLSFSSA</u> EQCGRQAGGALCPNNLCCSEYGWCGSTEAYCALPGCQSQ<br>C <u>TPS</u> <u>GPPPPGPPPP</u> DPTGGLTD <u>IITRSQFDDMLKHRNDAACPARGFYTYDAFITAAKYFPS</u><br><u>FCNNGDTVARKKELSAFFGQTSHETTGGWPTAPDGPYAWGYCFKEEVSPSSDYCQPSGQ</u><br><u>WPCVPGKRY YGRGPMQLSWN YNYGQCGAAIGEDLLNNPD LVSN DPVISLKA AIWFWM</u><br><u>TPQSPKPSCHAVINGQWQPSADIAAGRVPGYGVTTNIINGGLECGHGPDTRVYDRIGFY</u><br><u>QRYCGIFGVNTGDNLDC</u> YNQRSFASFKSFLDAAM                                                                                                                                                                                                                                                     |
| <i>BrCAGP17</i> | Bra034754        | GH                 | <u>MKTCLLLFLIFSLLLSFSSA</u> EQCGRQAGGALCPNGLCCSEFGWCGNTEPYCKQPGCQSQ<br>CGG <u>TPP</u> <u>GP</u> TGDLSG <u>IISRSQFDDMLKHRNDNACPARGFYTYDAFINAAKSFPGF GTTGDT</u><br><u>ATRKKEIAAFFGQTSHETTGGWATAPDGPYSWGYCFKQE QNPSSNYCSPSAEWPCASGK</u><br><u>SY YGRGPMQLSWN YNYGQCGRAIGSDLLNNPD LVSN DPVIAFKAAIWFWMTPQSPKPS</u><br><u>CHAVIVGQWQPSDADRAAGRVPGYGVITNIINGGLECGRGQDATRVADRIGFYQRYCNI</u>                                                                                                                                                                                                                                                                                                  |

|          |           |                 |                                                                                                                                                                                                                                                                                                                                                                                                                                                                                                                                                                                                                                                                                      |
|----------|-----------|-----------------|--------------------------------------------------------------------------------------------------------------------------------------------------------------------------------------------------------------------------------------------------------------------------------------------------------------------------------------------------------------------------------------------------------------------------------------------------------------------------------------------------------------------------------------------------------------------------------------------------------------------------------------------------------------------------------------|
|          |           |                 | LGVNPGGNLDCYNQRSFASVNFFLDAAI                                                                                                                                                                                                                                                                                                                                                                                                                                                                                                                                                                                                                                                         |
| BrCAGP18 | Bra033641 | GH              | MEPSVYRLFLLFFLCLYGLHQTKSQPFIGVNYGQTADNLPPPSATAKLLQSTSIQKVRLYG<br>SDPAIIKALANTGIEIVIGTGDVPGLASDPSFARSWVETNVVPYYPASKITLIDVGNEATTF<br>GDRNFMLQLLPAMKNVQSALEAASLGGKIKVSTVHTMSILSQSDPPSAGVFAADHADIL<br>KGLLEFNRETGSPFAVNPYPFFAYQSDPRPETLAFCLFQPNPGRVDANSKIKYMNMFDAQ<br>VDAVYSALSSFGFKDVEIVVAETGWPYKGDPEVGTTIENAKAYNKNLIAHLKSMAGTP<br>LMPGKVIETYLFALYDENLKP GKGSERAFGLFKPDLTMTYDI GLTKTTNQTSMA PQSPTP<br>RLPPAAAPTSQTLPAAPPQMILPSPTSPSDKNSGQTDVHNSTPR                                                                                                                                                                                                                                      |
| BrCAGP19 | Bra027699 | GH and<br>CBM49 | MEIKFASVAALLLLLSFPVAFSGHDYGGQALSKSLLFFEAQRSGVLPRNQRTWRSHSGLT<br>DGKSSGVNLVGGYYDAGDNVKFGLPMAFTVTMMAWSVIEYGNQLAANGELGHSIDAI<br>KWGTDYFIKAHPEPNVLYGEVGDGNTDHYCWQRPEEMTTDRKAYRIDPSNPGSDLAGE<br>TAAAMAAASIVFRRSNPAYSRLLLTHAYQLFDFADKYRGKYDSSITVARKYYGSVSGYN<br>DELLWAAAWLYQASNNQFYLDYLGRNGDSMGGTGWSMTEFGWDVKYAGVQTLVAKF<br>LMQGKAGRHTAVFQKFQKADFFMCSSLGKGSRNQKTPGGLIFRQRWNNMQFVTSAS<br>FLTTVYSDYLTSSRSNLRCSAGNVAPSQLLSFAKSQVDYILGDNPRATSYMVGYGNNFPQ<br>RVHHRGSSIVSYKVDRSFVTCRGGYATWFSRKGSDPNLLTGAIVGGPDAYDNFADRRDN<br>YKQTEPATYNNAPLLGVLARLSSGHSYGYSQLLPVVPAPVVVRRPMPPIRKPRVTSPVRASG<br>PVAIVQKMTGSWVSKGRTYRYSTTVINKSPRALKSLNLSIKNLYGPIWGLSRSGNSFGL<br>PSWMQSLQSGKSLEFVYIHSTSEANVAVSSYTLA |
| BrCAGP20 | Bra027735 | GH and          | MKNFASVAALLLLLCFPVAFSGHDYGGQALSKSLLFFEAQRSGVLPRNQRTWRSHSGLT<br>DGKSSGVNLVGGYYDAGDNVKFGLPMAFTVTMMAWSVIEYGNQLAANGELGHSIDAI                                                                                                                                                                                                                                                                                                                                                                                                                                                                                                                                                             |



|                 |                  |                                                                                                        |                                                                                                                                                                                                                                                                                                                                                                                                                                                                                                                                                                                                                                                                                 |
|-----------------|------------------|--------------------------------------------------------------------------------------------------------|---------------------------------------------------------------------------------------------------------------------------------------------------------------------------------------------------------------------------------------------------------------------------------------------------------------------------------------------------------------------------------------------------------------------------------------------------------------------------------------------------------------------------------------------------------------------------------------------------------------------------------------------------------------------------------|
|                 |                  | CBM49                                                                                                  | <p>KWGTDYFIKAHPEPNVLYGEVGDGNTDHYCWQRPEEMTTDRKAYRIDPSNPGSDLAGE<br/> TAAAMAAASIVFRRSNPAYSRLLLTHAYQLFDFADKYRGKYDSSITVARKYYGVSVSGYN<br/> DELLWAAAWLYQASNNQFYLDYLGRNGDSMGGTGWSMTEFGWDVKYAGVQTLVAKF<br/> LMQGKGGRHTAVFQKFQKADFFMCSLLGKGSRNQKTPGGLIFRQRWNNMQFVTSAS<br/> FLTTVYSDYLTSSRSNLRCSAGNVAPSQLLSFAKSQVDYILGDNPRATSYMVGYGNNFPQ<br/> RVHHRGSSIVSYKVDRSFVTCRGGYATWFSRKGSDPNLLTGAIVGGPDAYDNFADRRDN<br/> YEQTEPATYNNAPLLGVLARLSSGHSGYSQLLPAVPAPVVRPMPPIRKPRVTSPVRASG<br/> PVAIVQKMSGSWVSKGRTYRYSTTVINKSPRALKSLNLSIKNLYGPIWGLSRSGNSFGL<br/> PSWMHSLQSGKSLEFVYIHSTTPANVAVSSYTLA</p>                                                                                                    |
| <i>BrCAGP21</i> | <i>Bra018152</i> | Plant<br>invertase/pecti<br>n<br>methylesterase<br>inhibitor<br>(PMEI)<br>domain and<br>Pectinesterase | <p>MLRGNGIFHICLLASFLLLPFSSAVHDGDFSGGANAPSSWDHNIAPSQETAPSPPTTSP<br/> TTSPSPGPAAAPSPINNDISISGDMTWWCNKTPHAETCNYYFQRSPHNNINRPPRFRSEFL<br/> RLLVQVALDQAVITHAQTVKFGPSCNTNNQRKAAWSDCVKLFENTVAQLNLTCLKLNPA<br/> ASSDVKCSNFDAQTLWLSTAQTNIETCRSGSEDLKVSDFVMPAISNKNLSDLIGNCLAVNG<br/> VLMKQHNHTTANHKEYFPSWVSRHERLLVSASLAKSRPHLVVSQDRSGHFERSIQSAIN<br/> FAGRRRIKSRFIIYVKKGVYRENIEVGNDNHNIMLVGDGARKTIITSGRSVKNGYTTYNS<br/> ATAGFGGQRFVAKDMTFINTAGPLRGQAVSVRSSDLSVFYRVGIHGFQDTLYIHSQRQF<br/> FRECYSISGTIDFIFGNAAVVFQNCMILVRRPLRGQANVITAQGRGDPFQNTGITHSSRIIA<br/> ASDLRPVIGAYKTYLGRPWQAYSRTIMKTYIDNSISPLGWSPWLGRSNFALNTVFYGE<br/> YKNFGPGSSSTRWRVRWKGFHAITSAAVASRFTVGS LIAGGSWLPSTGVPFKTGL</p> |
| <i>BrCAGP22</i> | <i>Bra033792</i> | PMEI and<br>Pectinesterase                                                                             | <p>MVRGIFHICLLASFLLLPQFSSTVNYRGFTVGANVPSPWDHNIPPPPETTPFA SPTTSPPTT<br/> SAQSPGPAAASSPINNSSISGDMTWWCNKTPHAKTCTYYFQKSPDRNISRPPRFRSEFLR</p>                                                                                                                                                                                                                                                                                                                                                                                                                                                                                                                                        |

|                 |                  |                            |                                                                                                                                                                                                                                                                                                                                                                                                                                                                                                                                                                                                                                                                                                        |
|-----------------|------------------|----------------------------|--------------------------------------------------------------------------------------------------------------------------------------------------------------------------------------------------------------------------------------------------------------------------------------------------------------------------------------------------------------------------------------------------------------------------------------------------------------------------------------------------------------------------------------------------------------------------------------------------------------------------------------------------------------------------------------------------------|
|                 |                  |                            | <p>MLVHVALDQAVIAHAQTVKLGQSCTNNQQKGAWSDCVTLFENTVTQLNQTFNGLNPG<br/> ASSDVKCSDFDAQTWLSTAQTNIQTCRSGAEDLKVSNFVMPAISNKNLSDLIGNCLAVN<br/> GVLMKQHNHKTANHKEYFPSWVSRHERLLVSASLAKSRPHLVVAQDRSGHFRSIQAAI<br/> NFAGRRIKSRFVIYVKKGVYRENIEVGNDNHNIMLVGDGERKTIITSARSVKGGYTTYN<br/> SATAGFGGQRFVAKDMTFINTAGPLRGQAVSVRSSSDLVSFYRVGIHGFQDTLFIHSQRQF<br/> FRECYSISGTIDFIFGNAAVVFQNCMILVRRPLHGQANVITAQGRGDPFQNTGITHSSRIVA<br/> ASDLRPVIRAYKTYLGRPWWQAYSRTIMKTYIDNSISPLGWSPWLRGSNFALNTVFYGEY<br/> KNFGPGSSSTRWRVRWKGFAITNAAVASRFTVGS LIAGGSWLPSTGVPFKTGL</p>                                                                                                                                                                |
| <i>BrCAGP23</i> | <i>Bra034140</i> | PMEI and<br>Pectinesterase | <p>MKTLHFSSSLLFLSVLFLSCAFLISPQAPSPSPSELSSQPPSLPPSQSPSLPPSQPPSLPPSKPP<br/> SLPPSQSTSDACKSTPYPKLCRTILSAVKSSPSDPYSYGKFTIKQCLKQASRLSKVINGYV<br/> RRVRSKPGSMTAEIGAVADCGELAELSVSYLETVAEELKMADMMTAALVEHVNSLLSG<br/> VVTNQQTCLDGLVEAKSGFAAAIGSPMGNLTRLYSVSLGLVSHALNRNLKRFKASKGKI<br/> LGGRNSTYREPLETLIKVLRKTCNDKDCRKAARKLGELGVTSGGSILVSQAVIVGPYKS<br/> DNFTTITDAIAAAPNNARPEDGYFVIYAREGVYEEYIVVPINKKNLLLMGDGINKTIITGN<br/> HNVVDGWTTYNCSFAVTGERFMAVDVTFRNTAGPEKHQAVALRNNAEGSTFYRCSFE<br/> GYQDTLYVHSLRQFYRECDIYGTIDFIFGNAAAIFQNCNIYARKPMAKQKNAITAHGRTE<br/> PNQNTGISIINCTIKAAPDLAADPTSTMTFLGRPWKPYSTRVFMQSYISDIVQPVGWLEW<br/> NGTTGLDTIYYGEYDNFGPGAKTDRRVQWLGYNLLDMAQAMNFTVYNFTLGDWTWLP<br/> QTDIPFYGGLVRKE</p> |
| <i>BrCAGP24</i> | <i>Bra040283</i> | PMEI                       | <p>MESNKTFWIIILIVTVSTFLTPMVESKSVPLRDSYVARSLLSVSPPSESPSSSPAPGPEVENT<br/> IAVPASSPTEIDIDSPSPSPGAPADSISPTNAPTTSPPSPSPEAPANAPATDSPSPSPEVDMDSP</p>                                                                                                                                                                                                                                                                                                                                                                                                                                                                                                                                                          |

|                 |                  |                                                                              |                                                                                                                                                                                                                                                                                                                                                                                                                                                                                                                                                                                                                                                                                                                                                   |
|-----------------|------------------|------------------------------------------------------------------------------|---------------------------------------------------------------------------------------------------------------------------------------------------------------------------------------------------------------------------------------------------------------------------------------------------------------------------------------------------------------------------------------------------------------------------------------------------------------------------------------------------------------------------------------------------------------------------------------------------------------------------------------------------------------------------------------------------------------------------------------------------|
|                 |                  |                                                                              | <p>SPSSEAPVDSTSPANPPTMDIISPSPSPEAPEDSA<span>SPANPPTMDIDSPSPSPETPEEIPGAPS</span><br/> GKTLISSATTLLKQTLLSPEIKTICGKTDNPELCESSISPLLTAAIKPDASSVLVLAIQASINA<br/> TKAVMPTVNKVAAADCQELYDDAVSNLEDAINAVNESDIATVNSNLSAAMTDYGTCDN<br/> GFEESGEPNPLADVADKLHKMVSNCCLAISTLIK</p>                                                                                                                                                                                                                                                                                                                                                                                                                                                                                 |
| <i>BrCAGP25</i> | <i>Bra024570</i> | PMEI                                                                         | <p>MKKPSLHQPIFFLATLLPLILTVHSQPSPSPSPSPSPSPSPSDDSDFIQRSCNTTLYPDVCV<br/> SSLSNFSTYVHNDPALLARAAISVTLNALELGKYLSNVSTLLEIHEDGGHHPTAAAVFH<br/> DCFENLKDAVDEMRRSMKQMRDLVTTGSLESFRFQMSNVQTWLSAALTNEETCTDEFK<br/> DVQDEPRKDEV CARVDGVKKLTSNALALVNRCVDNAIH</p>                                                                                                                                                                                                                                                                                                                                                                                                                                                                                               |
| <i>BrCAGP26</i> | <i>Bra033660</i> | Xylanase inhibitor<br>N-terminal (TAXi-N) and<br>TAXi<br>C-terminal (TAXi-C) | <p>MDRASLLALLLLLLLIIFDLTAADKIPDLAAESGMIFPLSYSSLPPRVEDLRLRRRILHQSQQ<br/> LPNAHMKLYDDLLANGY YTTRLLIGTPPQEFALIVDTGSTVTYVPCSTCKHCGKHQDPK<br/> FQPELSTTYEAVKCNPDNCDDDGKLCIYERRYAEMSSSSGILSEDLISFGNESQLSPQRA<br/> VFGCENVETGDLFSQRADGIMGLGRGKLSIVDQLVDKGVIEDSFSLCYGGMEVGGGAM<br/> VLGKI SPPAGMVFARSDPFR SPY YNIDLKQMHVAGKSLKLNPKVFNGKHGTVLDSGTTY<br/> AYFPKEAFNAIKDAVIKEIPSLKRIHGPDPNYDDICFSGAGRDVAEIHNFPEIAMEFGNHQ<br/> KLILSPENYLFRHTKVRGAYCLGIFPDRDSTTLLGGIVVRNTLVTYDRENDKLGLFKTNC<br/> SDLWRRLASPPDSPAPT SPVTQNKSLNNI SPSR SPSPAPSKAPTVDLPGVFRIGVITFQVVIS<br/> VNNASMKPNFSEIADFIAHELEIQSSQASLNMHFPLVRLLSITTSGNEYRLKWGIYPPQSS<br/> EYISNNTALNIMSLLKENKLRLPGQFGSYKLEWKAQKRKQSWLEKHLVGVVGVMI<br/> SLLVTSVIVKLALVWRRRQQEEATYEPVSAAVKEQELQPLSSSETSNA</p> |
| <i>BrCAGP27</i> | <i>Bra036814</i> | TAXi-N and                                                                   | <p>MLQFGFCVMSLGCASVSGSFSFQIHHRFSDQVKTVLGSGLPEMGTLEYETLVHRDRG<br/> RRLTSNNNQTTVSFAQGNSTQEISFLHYANVTVGTPAQWFLVALDTGSDLFWLPCNCKSS</p>                                                                                                                                                                                                                                                                                                                                                                                                                                                                                                                                                                                                                |

|                 |                  |                   |                                                                                                                                                                                                                                                                                                                                                                                                                                                                                                                                                                     |
|-----------------|------------------|-------------------|---------------------------------------------------------------------------------------------------------------------------------------------------------------------------------------------------------------------------------------------------------------------------------------------------------------------------------------------------------------------------------------------------------------------------------------------------------------------------------------------------------------------------------------------------------------------|
|                 |                  | TAXi-C            | <p> CIRSMETDQGERIKLNIYDPTISTSSSKVPCNSTLCALRNRCVSPLSDCPYRIRYLSPGSRSTGVLVDDVIHMRTEEGEPRDARITFGCSESQVGLFEKTAVNGIMGLAIANIAVPNMLAKAGVASNSFSMCFGLKGKGTISFGDKGSSDQLETPLSGTLSPPFYDVTITEFKVGSVTVETETAIFDSGTAVTWLIEPYTAVTTNYHLQVADRRLPARVKSPFEFCYIITSATDEEKIPSISFEMQGGATYNVFSPLVFDTSDDGGQVYCLAVLKEVTAGFNIIGQNFMTNYRIVHDRERMILGWKESDCNDKNGFTGPTASANPPSLPPTPSPRARSPSTRLNPLAASSLLILCFFSFICL </p>                                                                                                                                                                                 |
| <i>BrCAGP28</i> | Bra036815        | TAXi-N and TAXi-C | <p> MAIGRHVFVLLSALVLSWGLERCEATGKFSFEVHHMFSDAVKQNLGFDNLVPEEGSLEYFKVLAQRDLFRGRGLASNNEDSLTAEGNLTVFVSFLGSLHYANVSVGTPATWFLVALDTGSDLFWLPCNCGVTCISDLKDAGFPQSVPLNLYSPNTSSTSSSIRCSDDRCFESSRCSSPSSVCPYQVSESTTTTSTGTLLQDVFHLVTEVDLKPVEANVTLGCGQRQTGLFQNFQAVNGVLGLGVKDYSVPSLLAKAKLAANSFSICFGRVIGVVGRISFGDKGYTDQSETPFISVEPSTAYGVNVTGLSVGKKAVGFSMFAQFDTGSSYTHLREPAYSFTKAFNSRALDIRTPSDPQFPFEFCYNLSPNATNITFPIDMTFEGGSVMSIKNPFVTIKTEGGGRMYCLSIVKIEDLSPNIIGQNL MAGYRIVFDRERMVLGWKRSNCFEDES LTSAPPAEFGDTPPPPSESEGPSPESEAPSPPTESNPLLRSPPPPPLVFTTTPPSDSTE SPGSSGVANVSPLGSLLLLSLLAFL </p> |
| <i>BrCAGP29</i> | <i>Bra012857</i> | TAXi-C            | <p> MAVARHVFVFLSVLVVVS WGLERCEATGKFSFEVHHMFSDAVKQTLGLDNLVPEKGSM EYFKVLAHRDQLIRGRGLASNNEKPSVTFMRENLTIGVDVLGSLHYANVSVGTPATWFF VALDTGSDLFWLPCNCGTTCIRDLKDIGLPQNQTGLFGEGIALNGLLGLGLEDYSPSVL AKANITANSFSMCIGNVIDVIGRISFGDKGYTDQQETPLVPVGPSPTYAVDVTEVSVGGE ALGIKLLALVDTGTSFTHLLEAEYDLVTKTFDDQVKDKRRPIDPKIPFEFCYDLSPNSTTI YFPKIIMTFGGGSQMILRNPLFSVFNEDGTAMYCLGILKSVNFKLNIFGQNFLSGYRIVFD </p>                                                                                                                                                                               |

|                 |           |                           |                                                                                                                                                                                                                                                                                                                                                                                                                                                                       |
|-----------------|-----------|---------------------------|-----------------------------------------------------------------------------------------------------------------------------------------------------------------------------------------------------------------------------------------------------------------------------------------------------------------------------------------------------------------------------------------------------------------------------------------------------------------------|
|                 |           |                           | RERMVLGWKRSNCYEDESLEATPPPPPEIEAPSPRLSAPLPSPPPPPLVSIATPPPFDPRSSTG<br>NGSGGAASLSPLSSQLLLLLSLLAFLSFT                                                                                                                                                                                                                                                                                                                                                                     |
| <i>BrCAGP30</i> | Bra013345 | Leucine rich repeat (LRR) | MKLPLPLLLLLLLSPTTSAAPSLSPTPSPTIAPVPRTSPTPPRTSSSSSPLDPKQLKAESLN<br>IPTLRNPCDHPSSSSKPPTTVVTCDTGSPFRLVTSLSFTNCSSDLSSSTALKALSPSLPSLS<br>FHNCPSLSPPPHLPSDLHSFSAVSSFPRLSGLSLARLVNLTDTVSSVPVSTSGLFVILGNM<br>HDIVSLTISHANLSGNIPKSFHSNLTFIDLSDNLIKGIPTSITLLSNLKALNLSSNSISGEIP<br>SIGDLISLKNLSLSSNKLSGPIPDSSISIPDLTHLDLSGNQLNGTVPRFISKMKSLKYLNLAN<br>NAFHGVLPFNASFLKKLEVFKVGGNSDLCYNHTVLSSKMKLGIAPCDKHGLPLSPPPRK<br>EDSSSDDDYSEDDSSEKKKEEHGPNKAVLGVAIGLSSLVFLIIFMILLAKWCG       |
| <i>BrCAGP31</i> | Bra020993 | LRR                       | MKPLSPSLPLLLLLLLSSTTFAAPSLSPTPSPTIAPIPRTSPRTSSSPLDPKPLKAESLNIPTA<br>KNPCDHRPTSKPPSTVVTCDAAGSPFRLVTSLSFTNCSSDLSSSAALRALSPSLASLSFLNC<br>PSLSPPPRLPTSLRSFTATSSFLRRRKGLSGVYLARLVNLTDLTVSSVPVSTSGLFVILGNM<br>DKIVSLTVSHANLSGNIPKSLHSNLTFIDLSDNLIKGS IPTSITQLSNLKSLNLSSNSISGEIP<br>DSIGDLISLKNMSLSSNKLSGPIPDSSISLPDLTHLDLSGNQLNGTVPRFITKMKSLKHLNL<br>ANNFRGVLPFNASFLKKLEVFKVGGNSDLCYNRTVLSSKMKLGIACDKHGLPLSPPP<br>QKEDSSSDYDYGSEDETSVKKKEESRGPNKVVLGVSIGLASLVFLIIFLILCAKWCG |
| <i>BrCAGP32</i> | Bra026260 | LRR                       | MALSITFHALTSLLLFHVSLVSTATHTPHHHTSHSSNHLQKAYRALQAWKKVIYSDPKNL<br>TGDWIGPSVCSYTGIFCAPSPSDQNTLVVAGIDLNHGDIAGFLPEPIGLLSDLALIHLSNR<br>FCGILPRLSQLSLLYELDLNNRFVGPFPDVVLSLPSLKYLDLRYNEFEGPLPPKLFNSNPL<br>DAIFVNNNRLTSLIPRDFGTGTASVVVFANND FSGCLPPTIAHFA DTLEELLINSSLSGCL<br>PPEVG YLYKLRVLDMSYNSLVGPVPYSLAGLGHELLNLDHNMFTGAVPLGVCVLP SLQ                                                                                                                                     |

|                 |                  |                                      |                                                                                                                                                                                                                                                                                                                                                                                                                                                                                                                                                                                                                                                                                                                                                                                                                                                                                                                                                                                                                                                                                                                                                                                                                                                                                                                                                                                                                                                                                                       |
|-----------------|------------------|--------------------------------------|-------------------------------------------------------------------------------------------------------------------------------------------------------------------------------------------------------------------------------------------------------------------------------------------------------------------------------------------------------------------------------------------------------------------------------------------------------------------------------------------------------------------------------------------------------------------------------------------------------------------------------------------------------------------------------------------------------------------------------------------------------------------------------------------------------------------------------------------------------------------------------------------------------------------------------------------------------------------------------------------------------------------------------------------------------------------------------------------------------------------------------------------------------------------------------------------------------------------------------------------------------------------------------------------------------------------------------------------------------------------------------------------------------------------------------------------------------------------------------------------------------|
|                 |                  |                                      | NLTVSDNYFSEEEGTCRNLTSGIVFDDSNCLPDKPHQRSHKVCEDVLDHPVDCYDHE<br>CSAVAPQASPFAGPSLAPASAPAYT                                                                                                                                                                                                                                                                                                                                                                                                                                                                                                                                                                                                                                                                                                                                                                                                                                                                                                                                                                                                                                                                                                                                                                                                                                                                                                                                                                                                                |
| <i>BrCAGP33</i> | <i>Bra039561</i> | Formin<br>Homology 2<br>domain (FH2) | <u>MGRLRTAFLAVSLVFLVCVSE</u> EIISRRGANRGEAHGGDDVAEQTWIHCERKELKDKNRDC<br>LIYIPPRVAAANDTYQKLSVLTGWFSNWF <sup>GP</sup> LLDSTTSYPTRKLIGKQKRKKKKKKRKKFR<br>VS <sup>AP</sup> NFAL <sup>GPAP</sup> GF <sup>APGPSRF</sup> <sup>APGPAPTTP</sup> QSYDLV <sup>APSS</sup> <sup>SPSY</sup> <sup>SPAE</sup> <sup>AP</sup> DESSFG <sup>GP</sup> TKK<br>RAKSIV <sup>AP</sup> SQSV <sup>GP</sup> PPPPPEKKNDILMDLIIAVASTAVLTFFLVALLFLCCFRRNNRKNV<br><sup>GP</sup> RN <sup>GP</sup> RDE <sup>GP</sup> LLHLSDL <sup>SAGSNEN</sup> <sup>SP</sup> KVAATSRRFFTATSKKRSFLSRVSLKRNHHDFP<br>AEASSSSGLPLPPGRSSG <sup>AP</sup> LP <sup>PPV</sup> <sup>APPP</sup> <sup>Q</sup> <sup>APPP</sup> <sup>PP</sup> PK <sup>PPPP</sup> <sup>AP</sup> KLVR <sup>PPP</sup> <sup>AP</sup> PKRQGR<br>SSSGDGSDVDS <sup>ETGAPKTKLKPF</sup> <sup>FWDKMANPDQ</sup> <sup>KMVWHEISAGSFQFNEQEMESLFGY</sup><br><sup>NDVNKNKNGQRGESSRDSPVQYIQIIDPRKAQNL</sup> <sup>SILLRALNVTIEEVDAIKEGNELPV</sup><br><sup>ELLQTLLKMAPTSEEELKRLYSGLHLLGPAERFLKILVDIPFAFKRIESLIFMISLQEEVS</sup><br><sup>GIKESLATLEVACKKLKNSRLFIKLL</sup> <sup>EAVLKTGNRMNVGTFRGDAQAFKLDTLLKLSDV</sup><br><sup>KGTDGKTLLHFVLEIIRSEGVRALRLQRSSKS</sup> <sup>FSSVKTD</sup> <sup>DDTNTDTSPQ</sup> <sup>VERYRSTGL</sup><br><sup>QVVSGLTTELEDVKRAAI</sup> <sup>DADGLASTLMNLSGSLTNAREFLKTMDEESDFE</sup> <sup>KALTGFIE</sup><br><sup>RADGDIKWLKEEEE</sup> <sup>RIMVLVKSSADYFHGKS</sup> <sup>AKNEGLRLFAIVRDFLIML</sup> <sup>EKVCREVKE</sup><br>TTMMTSSKNHSSKKETKMIPESNQPDNIRRHLFPAIAERRADSSDDSDSD |
| <i>BrCAGP34</i> | <i>Bra037491</i> | FH2                                  | <u>MQTFCFSFLLLLSCAPS</u> PLSYASSALNLGRRHLSDDAGSALL <sup>TP</sup> <sup>SP</sup> <sup>T</sup> <sup>SPPFFPLESS</sup> <sup>AP</sup> LP<br>PPP <sup>SPP</sup> <sup>TFAAFPTTFPANISALVLP</sup> <sup>SP</sup> KPHST <sup>SP</sup> AILVPAISAVLVVA <sup>AVLGVALFLYGRWK</sup><br>GQNRHFKDTNTTLGGSSSSSHTSEERHVITNNFSVSAS <sup>SP</sup> TSEVLYLGGE <sup>EEEPDRVVT</sup> SF<br>VKPPE <sup>SP</sup> EIRPLPPLPRSFQPSYAEIH <sup>SERNEEE</sup> <sup>EEEEEEFF</sup> <sup>SP</sup> LASLASSANS <sup>SP</sup> SRSGF<br>EQSSCSSSSSGWV <sup>SP</sup> ARSFMTL <sup>SP</sup> VQQQRSF <sup>SRLSDVSLEQSLQSL</sup> <sup>SP</sup> ERLVRN <sup>NNGH</sup>                                                                                                                                                                                                                                                                                                                                                                                                                                                                                                                                                                                                                                                                                                                                                                                                                                                                            |

|          |           |     |                                                                                                                                                                                                                                                                                                                                                                                                                                                                                                                                                                                                                                                                                                                                                                                                                                                                        |
|----------|-----------|-----|------------------------------------------------------------------------------------------------------------------------------------------------------------------------------------------------------------------------------------------------------------------------------------------------------------------------------------------------------------------------------------------------------------------------------------------------------------------------------------------------------------------------------------------------------------------------------------------------------------------------------------------------------------------------------------------------------------------------------------------------------------------------------------------------------------------------------------------------------------------------|
|          |           |     | VSSSLRMFSFFNQNLSPRISASTSPDRGGFVRTPPLSSLYSSVSNSPDGLFRKFINSSPPIW<br>NDFSARNVKS VLLSSES VSSRRDFVINIGGQAGAVAAPPPTRPPPLVPPSQSFVVQNDVKKP<br>SFS DKVNQGSCQNTAWDCLKANSFKLNKEIVETLFISNSSSPNLNQRGGLTYDLPTQNEVS<br>YQNIATRLQLLNLTTKDVSNALLEGDSGALGAELLDCLSRAPSKEEERKL RNASDDSVI<br>IKLTPAERFLKELLQVPFVFKRVDALLSVANFYPEVEYLRRSFGVVQAACEELRNKNTFS<br>RLLEAILKTGNKMSVGTNSHAFKFDTLKLAEVKGLDGRSSVLHFAVQEMIKSEGSVKA<br>LDRIRNLSSEMETVKKSADIEYGVLTNGVLKLYQGIRSIKELLILSEESGCSGDQWMKFE<br>TKMGRFLETAGEEIVRIKAQESSTLSALEEVTELFHGGSFKEEGHTLRVFM AVRDFLSTL<br>DEV CNDMGERFSA                                                                                                                                                                                                                                                                                                                  |
| BrCAGP35 | Bra039436 | FH2 | MVYFRQIFLMIIVVAISLQCCSISADERYRTHIGKLVGEDGGEKKKLT VLEKFRALLDLIKP<br>STPRRRNLAA SPWPAPSPSPFPNGGPVE SPAY SPAPQRPPIPHLRRLPQORTHPPRQHEIQR<br>RKHEKGGVFVPLVVSTACGIGFVVCVVVVLCLCSRVRKKNGKTL SFKRKQRKSQKVSIN<br>PTLDFLYLNSVGVDLERQSSVLVKETENDDELREEEVKRSVETEILLDS DNAGSYSTKEI<br>VSVQEKTEHSVSASEDDEESFHSVGGGSQYSNPRLSNASSSSVSGIGSSSQRF SERELDIP<br>ECSGISHPPPPPPPPPPQLLQFSNRGLLHTLSSPETAKPQTFSSQLSAKVSASSSKPLPPPPP<br>PPPLPPSLQQQPQVMNKTPPPPLSLDFTQRTPLGKD GAPLPKLKPLHWDKVRATPDRTM<br>VWDKIRTSSFEFDEEMIESLFGYTMQTSTKNEEGKCKTPSPGKHLLEPKRLQNFTILLKA<br>LNATADQICSALGKGEGLC LQQLALVKMVPTKEEELKLC SYKGAVDELGSAEKFLRAL<br>VGVPFAFQRAEAMLYRETFEDEVHLRNSFSMLEEACKELKSSRLFLKLL EAVLKTGNR<br>MNVGTIRGGAKAFKLDALLKLSDVKGTDGKTTLHFVVQEISRSEGIRVSDSIMGRIMN<br>QRPKNKNTAEKEEDYRRMGLDLVSGLNTEL RNVKKTATIDLEGLVSSVSNLRDGLEQL<br>RCLASSEENRAFVSSMSSFLRYGEKSLEELREDEKRIMERVGEIAEYFHGDVRGDDKNPL |

|                 |           |     |                                                                                                                                                                                                                                                                                                                                                                                                                                                                                                                                                                                                                                                                                                                                                                                                                                                                                                                                                 |
|-----------------|-----------|-----|-------------------------------------------------------------------------------------------------------------------------------------------------------------------------------------------------------------------------------------------------------------------------------------------------------------------------------------------------------------------------------------------------------------------------------------------------------------------------------------------------------------------------------------------------------------------------------------------------------------------------------------------------------------------------------------------------------------------------------------------------------------------------------------------------------------------------------------------------------------------------------------------------------------------------------------------------|
|                 |           |     | RIFVIVRDFLGMLDQVCRELRCVRVPNSPSPLAPFR                                                                                                                                                                                                                                                                                                                                                                                                                                                                                                                                                                                                                                                                                                                                                                                                                                                                                                            |
| <i>BrCAGP36</i> | Bra001148 | FH2 | <p> <u>MVYFRQILLMIIVLVISLQCCNVFADTKELGEWTALMVANGERYRTQIGKLAGEDGGEK</u><br/> KKFPVLEKFRALLDLIKPSTLRRRSLATSASLAPWSAPSPSPFPNGGPAESPAYSPAPQRPPIP<br/> PHLRRPLPHRTHHPSRQHELTRRKHENRGAFIHVVVSAACGIGFVVCVVGAFFLYARRR<br/> KKNGKTPPFQSSTRKVSINPSHSLGDDLEKQSSVSVKEVRETEKDVDNDNKGVLLEDVK<br/> TSAETEILSDSDNASSFSTKEIVSVHENDEEQQTVDVSVPVVSNGCDSSDDNESFHSVG<br/> GGSSVGSSQRFSEIREILPPPPPPPPPPPLPGLHTLSLTKTTTLSSQLTAKVCASSSDSTLPS<br/> PPPLRPPPPPPPPSQQPQATNKTPPPLSLDFSQRRPLGKNGAPLPKLKPLHWDKVRATPN<br/> RTMVWDRLRASSFEFDEEMIESLFGYTMQSSTKNEEGKCKTPSPGKHLLEPKRLQNFTIL<br/> LKALNANADQICSALGKGLRLQQLEALVKMVPSKEEELKLCSYKGEVDELGSAEKFLR<br/> AVVGVPFAFQRAEAMLYRETFEDEVVHLRNSFSMLEEACKELKSSRLFLKLLEAVLKTG<br/> NRMNVGTIRGGAKAFKLDALLKLSDVKGTDGKTTLHFVVQEISRSEGIRVSDSIMGRI<br/> MNQRTNENRTAEIEDHRRMGLDLVSGLNTELNVKKTATIDMEGLVSSVSNLRDGLG<br/> GLKCLASEKLKGDEENRAFVSSMSSFLRYGERSLEELREDEKRVMMGRVGEIAEYFHGDV<br/> RGDEKNPLRIFVIVRDFLGMLDLVCRELCVRVPNSPSPLAPFR </p> |
| <i>BrCAGP37</i> | Bra037087 | FH2 | <p> <u>MGRLTKAFLAIFLVVLVCVSVEIIARDGANRLRSSVSEEAHGVDMAEKTKIRCRKELKDE</u><br/> NKDCLVYISREAAANGYVKLSVLTGYGHWFGPLLDSTPRRKLISKKKKFTVSAPNFALG<br/> PAPRLTPGPAPSTSPSQSSHSPDESNSAPVKRKPSVVAPSPSVVLSPAKKYDILMQLIIV<br/> ASTAVLTFFLVLTLLFLCCFRNRSPRDGPRDEGQFLHLVDLSPGSNETSPAAANPSRRFFS<br/> ASSKKKSFLSRMSLKRSGHDQFSTAQASTSSGHPPPLKLPPGRTAAPPPPPPPAAPAPPP<br/> QPPPPPKSKPPPPPKLVRPPAPPKGAAGKRQGHHSDDASDVDS<br/> ETGAPKTKLKPPFFW </p>                                                                                                                                                                                                                                                                                                                                                                                                                                                                                                                      |



|                 |                  |     |                                                                                                                                                                                                                                                                                                                                                                                                                                                                                                                                                                                                                                                                                                                                                                                                                                                                                                                           |
|-----------------|------------------|-----|---------------------------------------------------------------------------------------------------------------------------------------------------------------------------------------------------------------------------------------------------------------------------------------------------------------------------------------------------------------------------------------------------------------------------------------------------------------------------------------------------------------------------------------------------------------------------------------------------------------------------------------------------------------------------------------------------------------------------------------------------------------------------------------------------------------------------------------------------------------------------------------------------------------------------|
|                 |                  |     | DKMANPDQKMVWHEISAGSFQFNEEAMESLFGYNDGNKNKSGQRGESSRDSHVQYIQI<br>IDPRKAQNLSILLRALNVTTEEVEAIKEGNELPVELLQTLLKMAPTTEEELKLRLYSGD<br>VNLLGPAERFLKILVDIPFAFKRIESLLFMISLQEEVSGIKESLSTLEVACKKLRSRLFLKL<br>LEAVLKTGNRMNVGTFRGDAQAFKLDTLLKLSDVKGTDGKTLLNFVVLEIIRSEGVRA<br>LRLQSKSFSSVRTEEDTNNNNTDSSPQSVERYRSTGLQVVSGLTTELEDVKRAAVIDADG<br>LAATLTNLSDSLTAAREFLKSMEEEESDFEKALAGFIERADADIKWLKEEEEERIMALVKSS<br>ADYFHGKSAKNEGLRLFAIVRDFLIMLEKVCRHVKETTTSATKTRTHSGKKETQVTMQE<br>DSHQPSTDNIQQRLFPAIAERRDDSSDDSDDE                                                                                                                                                                                                                                                                                                                                                                                                                            |
| <i>BrCAGP38</i> | <i>Bra004786</i> | FH2 | MSRIPSLRLRFATILFLFSSSSSSADQRLHSRHLHQPFFPIPTAAPPYQPPPPSSEPPSPSPRS<br>HHHHKNHPETPPPHEKHPFSSASNPPPPPPPPSPPHNTFFPSSDPSSPTSHPPPSPSPHR<br>APVPTFPANISSLVFPTHNKPHNSNPVAKLLAITIAVVSAAILLSLLAVATIFLRRRRRRAS<br>PAKSTKTDARHLFNAAPSDVPLKHKQPPKYTSSNTSSEFLYLGLTVNSGLVDQQKSPGSV<br>AGVLELPPAQGSSSSTPSYSQYQKLGSPELRPLPLPKLPVYTPNYRSTELLNPKGQDFDG<br>DDNENDEFYSPRGSPVRKQSPRVKNSGSPGTSLKPPKSSLSPRLSLNSSNGSVSKKPVPT<br>RPPPPPPQIHVLPVTNSVSEEKDETFKPKLKPLHWDKVRASSRVTVWDQIKSNSFQVN<br>EEMIETLFRANDPTSRTKESVTTDVVQSTSHQFLDPRKSHNIAILLRALNVTADDEVCEAL<br>VEGNSDALGSELLQCLLKMAPTKEEEDKKELKEDDDDESSPSKTGPAERFLRALLNIPL<br>AFKRINAMLYIVNFESETEYLKRSFHTLEAACGELRNTRMFLKLLLEAVLKTGNRMNIGT<br>NRGDAHAFKLDTLLKLVDIKGADGKTLLHFVVQEIHKSEGARVSTTPTQSPVGVNMAE<br>QSAFQDDLELKKLGLQVVSTLSSQLTNVKKAAAMDSTLSDEAAELSKGITKVKEVIME<br>LKQETGVERFLDSMNSFLNKAKEITEVQSHGDSVMKMOVKEVTEYFHGNSESHPSRIFT<br>VVRDFLTVDQVCKEVGRVNERTVYGSVPRASVSNQVVTPLFPVANNDNNSEKSHSGSL |

|                 |                  |     |                                                                                                                                                                                                                                                                                                                                                                                                                                                                                                                                                                                                                                                                                                                                                                                                                                                                                                                                                                                                                                                                                                                                                                                                               |
|-----------------|------------------|-----|---------------------------------------------------------------------------------------------------------------------------------------------------------------------------------------------------------------------------------------------------------------------------------------------------------------------------------------------------------------------------------------------------------------------------------------------------------------------------------------------------------------------------------------------------------------------------------------------------------------------------------------------------------------------------------------------------------------------------------------------------------------------------------------------------------------------------------------------------------------------------------------------------------------------------------------------------------------------------------------------------------------------------------------------------------------------------------------------------------------------------------------------------------------------------------------------------------------|
|                 |                  |     | GNQEDEDLF                                                                                                                                                                                                                                                                                                                                                                                                                                                                                                                                                                                                                                                                                                                                                                                                                                                                                                                                                                                                                                                                                                                                                                                                     |
| <i>BrCAGP39</i> | <i>Bra000328</i> | FH2 | <p> <u>MSKIPFLLRFAVIVFFIFSSYSSGDQRLNSRHLLHQPFYPIVTA</u><b>APPP</b>LSSKPP<b>SPSP</b>DKQPPP<br/> PPPPPPLSSNPP<b>SPSP</b>DKPHHHKKHPAA<b>APPP</b>QDKHLFSSV<b>TPPPPP</b><b>AP</b>HSNPFFPSNAVHP<br/> <b>SPPPP</b>PPASIPTFPANISSLFFPPHNSSKPHTNNHHVAKLVSITVSVVSSSVLLSLLVVLILYL<br/> RRTRRRRRLPAYNTKSTRSDSLQLFNA<b>SP</b>SDGARKHKQPHKHTSSNTSSDFLYLGLTVNS<br/> RSEGF<b>APQK</b><b>SP</b>VSRNVAGVLELPPVPASSSSSSSYSRNQRP<b>SP</b>ELRPLPPLPKLPAF<b>SP</b>TY<br/> <b>L</b><b>SP</b>EHLFPKRQDFDGDDEFF<b>SP</b>RGSSGRKQ<b>SPP</b>RVVEDSGVVQSVNDSNSC<b>SP</b>TSFNDS<br/> <b>P</b>ATSLKPTSL<b>SP</b>LSLHSETSSNGSVLKK<b>TGP</b>ARPPPPPPPPPPPPQFSEVPAAT<b>SP</b><b>SPP</b>SDPK<b>K</b><br/> KEETLKPKLKALHWDKVRASSSRVMVWDQIKSNSFQVNEEMIETLFRANDPSSRARDV<br/> GNAGVVQSANQENQFLDPRKSHNIEILLRALNVTADDEVCEALVEGNADMLGPELLECLL<br/> KMAPTKEEEDKLKELKDDDESTTSKIGPAEKFLRALLNIPLAFKRIDAMLYIVNFDSETE<br/> YLKRSFHTLEIACGELKNTRMFLKLLEAVLKTGNRMNIGTNRGDAHAFKLDTLLKLVDI<br/> KGADGKTLLHFVVQEIIKSEGARVSSPTPIQSPIGDDDIAEQSAFQDEIELKKLGLQVVSG<br/> LSSQLINVKKAAMDSTLSKEIAEISSGITKVKEVIMELKQETGVERFLESMNSFLDKGE<br/> KVITEIQSHGINVMKMVKEVTEYFHGNLESHPFRIFTVVRDFTILDQVCKEVGRVNERT<br/> VYGSRP<b>SP</b>SNQTV<b>TP</b>LFPVNVINHAELSHDDDSFQVITIG </p> |
| <i>BrCAGP40</i> | <i>Bra029012</i> | FH2 | <p> <u>MILGGGMCNQNWARLVLLLVL</u>LSGFFLVIALAESSEKDETfISQFM<b>AP</b>STEQANEQMVET<br/> LWAHRCWQDPDCVKEAVTVFNLCFPGSKDNNLELFGF<b>TP</b>SHLKQTLLMCIQKQGELNG<br/> HNLNYLKLLPSILDN<b>AP</b>RRNLAS<b>TPSP</b><b>SPP</b>KRSSRRPPPAASKKSVSEKLTSP<b>AP</b>AAKG<br/> KEDHQKTIIIAVTTAVSTFLLAACFLCCTKVCCKGSGGRINDERPLLSLSSNEYSLGSS<br/> NNYGGSGKGHQSFNNGNSDNFVTLERMSMDGMFNNINNSHGIPPLK<b>APP</b>GRKSSKIS </p>                                                                                                                                                                                                                                                                                                                                                                                                                                                                                                                                                                                                                                                                                                                                                                                                                |

|                 |                  |                                                           |                                                                                                                                                                                                                                                                                                                                                                                                                                                                                                                                                                                                                                                                                                                                                                                                                                                                                                     |
|-----------------|------------------|-----------------------------------------------------------|-----------------------------------------------------------------------------------------------------------------------------------------------------------------------------------------------------------------------------------------------------------------------------------------------------------------------------------------------------------------------------------------------------------------------------------------------------------------------------------------------------------------------------------------------------------------------------------------------------------------------------------------------------------------------------------------------------------------------------------------------------------------------------------------------------------------------------------------------------------------------------------------------------|
|                 |                  |                                                           | <p>             WKPPSGKVEPLPPEPPKFLKVSSSKKSSSAPSPSPPPPPMPSSAGPPRPPPPAPPPGSGGPKP<br/>             PPPPGPKGPRPPPPMSLGKKAPPASPGPASSGDDDA PKTKLKPFWDKVQANPEQSMVW<br/>             NDIRSGSFQFNEEMIESLFGYAAADKNKNDKKGGSGQAALPQFIQILEPKKGQNLSILLR<br/>             ALNATTEEVCDALLEGNELPVEFIQTLLKMAPTPEEELKLRLYSGEIAQLGTAERFLKAV<br/>             VDIPFAFKRLEALLFMCTLHEEMAFVKESFQTLEVACQELRGSRLFLKLLEAVLKTGNR<br/>             MNDGTFRGAAQAFKLDTLKLADVKGTDGKTTLHFVVQEIRTEGRRRAARTIRESQSF<br/>             SSVKTEDLMAEETSEEMEENYRGLGLQKVSGLSSELEHVKKSANVDADSLTGTVLKMG<br/>             HALAKAREFVNSEMKSSDEESGFREALEDFIQNAEGSVVEILEEEKRIMALVKATGDYFH<br/>             GKAGKDEGLRLFVIVRDFLIILDKSCKEVREAKGKQVKMARKQGSTASSVASEIPRAPSL<br/>             DPREKLFPAITERRVDQSSSDSD           </p>                                                                                                                    |
| <i>BrCAGP41</i> | <i>Bra019092</i> | Glycerophosphoryl diester phosphodiesterase domain (GDPD) | <p> <u>MRGLLLLCGVVLIQLLAAQTDA</u>QGSKSKWQTLTGFSRVIARGGFSGLFPDSSIDAYNFA<br/>             MLTSVEDVVLWCDLQLTKDGAGICFPGLTMSNASNIEAAYPNRTNTYLVNGVSTQGWFT<br/>             IDFSLKDLNKNVNLIRGILSRSERFDGNGYSILTVQDVNTELKPQGLWLVNQHEAFYAQHN<br/>             LSMTTFLTTASKTVIIDFISPEVNFFKKIAGRFRILVPKSYVLPLDDKQYLLPSTSLVQD<br/>             AHKAGLEV FVSGFANDVDIAHDYSYDPVSEYLSFVDNGNFSVDGVLSDFPISASASVEC<br/>             FSHMGRNATKQVDFLVISKNGASGDYPGCTDLAYAKAIKDGAVIDCSVQMSSDGT PFC<br/>             SSSIDLGKTTMVAQTPLRNRSTNVPEISSLGGIYTFSLTWPEIQTLTPAISNPYRTYNMFRN<br/>             PNERNAGKLVSLSDFLNLAKNSTSLSGVLISVENAAYLRENQGLDVVKAVLDTLTETGY<br/>             TNITTKKVMIQSTNSSVLLDFKKQSR YETVYKVEETIRDILDSAIEDIKRFASAVVIVKSSV<br/>             FPDSEGFVTGQTNVVERLQKSQLPVYVELFQNEFVSQPYDFFSDANVEINSYVTGAGVN<br/>             GTVTEFPFTAARYRRNRCLGSKETPPYMAPVQPGG LLQVNVHASLP AEAPNPVFTDAD           </p> |

|          |           |      |                                                                                                                                                                                                                                                                                                                                                                                                                                                                                                                                                                                                                                                                                                                                                                                                                                       |
|----------|-----------|------|---------------------------------------------------------------------------------------------------------------------------------------------------------------------------------------------------------------------------------------------------------------------------------------------------------------------------------------------------------------------------------------------------------------------------------------------------------------------------------------------------------------------------------------------------------------------------------------------------------------------------------------------------------------------------------------------------------------------------------------------------------------------------------------------------------------------------------------|
|          |           |      | VTEPPLPPVTAKAPTSTTPGTPSKPSTNAPAPSGQTRLTSLLLSVFPMASLLLL                                                                                                                                                                                                                                                                                                                                                                                                                                                                                                                                                                                                                                                                                                                                                                                |
| BrCAGP42 | Bra026409 | GDPD | MRGLRASSLLLCGVVLIQLLAVQIDAQRPKTQWKTLSGFSPRVIARGGFSGLFPDSSLDA<br>YNFAMQTSVLDVAVLWCDLQLTKDGAGICFPDLTMSNASNVESVYPKGQSTYPVNGVPT<br>PGWFTIDLSLRALTNVSLIRGILSRSDKFDGNGYTISTVQTVNKEMKPQGFWLNVQHDA<br>FYAQHNLSMSNFLVSVTKTVIVDFISSPEVNFFRKIAGRFGREGPSFVFRFLEKEQFEPTTN<br>RTYGSILSNLTFVKTFASGILVPKSYVLPLDDKQYLLPSTSLVQDAHKAGLEVFSVSGFAND<br>VDIAHDYSFDPVSEYLSFMDNGNFSVDGVLSDFPITASASVECFSHVARNATKQVDFLVI<br>SKNGASGDYPGCTNLAYEKAINDGADVIDCSVQMSSDGKPCSSSIDLGNTTMVAQSPL<br>RNRSTSVPEISSVNGIYTFTLTWPEIQTLTPAISNPYSRRFNMFRNPNERNSGKLLSLSEFL<br>NLAKNSTTSLGVLISVENAAYLREKQGLDVVKAVLDALTETGYSNRRTTKVMIQSTNSS<br>VLVDFKKQSQYETVYKVEETIRDILDSAIEDIKTFASAVVIGKSSVFPVVDGFTVGTQTNV<br>ERLQKSQLPVYVELFQNEFVSQPFDFSDATVEINSYVTGPGINGTITEFPFTAARYRRNR<br>CLASKETLSYMAFVQPGGLLEVVSPPGSLPPAEAPNPVFTDADVTEPPLPPVTAKAPTPTP<br>GTPSTTAPAPSGQTQLTSLLLSVFAMVLASLLLM |
| BrCAGP43 | Bra002904 | GDPD | MLGSRASKFLLSALILIHLLPTQLLAQRSKSPWQTLTGSAPLIARGGFSGLLPDSSVDAYS<br>IVSQTSVSGAVLWCDVQLTKDGVGICFPDVKMMNASSIQDAYPKRKNSYLVNGVPTQD<br>WFTIDFTLKDLSVFLIRGILSRSDAFDNNQYAISTVQDIAMELKPKSFWLNVQHDAFYA<br>QHNLSISKFMLSPLKTVTINYLSPEVTFLRSIGGRFGKAGPKFVFRFLEKDDVEVSTNQT<br>YGTLLGNLTFIKTFASGVLVPKSYIWPLEDQYLSPHTSFVQDAHKAGLEVYASGFANDFD<br>MAYNYSFDPLAEYLSFMDNGDFSVDGFLSDFPLTASSAVDCFSHLGSNASTQVDFLVISK<br>NGASGDYPGCTDLAYSKAIDGADIIDCSVQMSLDGIPFCLNSVDLGESTNIVQSPFRNR                                                                                                                                                                                                                                                                                                                                                                             |

|          |           |      |                                                                                                                                                                                                                                                                                                                                                                                                                                                                                                                                                                                                                                                                                                                                                                                                                                               |
|----------|-----------|------|-----------------------------------------------------------------------------------------------------------------------------------------------------------------------------------------------------------------------------------------------------------------------------------------------------------------------------------------------------------------------------------------------------------------------------------------------------------------------------------------------------------------------------------------------------------------------------------------------------------------------------------------------------------------------------------------------------------------------------------------------------------------------------------------------------------------------------------------------|
|          |           |      | SATVPEIAPLGGLYSFSLTWSEIQTLRPAITNPYNRDFNLFRNPKERSSGKLVSLSDFLNLA<br>KSSTSLAGVLISVENAAYLREKQGLDVVKAVLDTLTKAGYSNATTTTKKVMIQSTNSSV<br>LVDFKKQSRYETVYQVEETIRDILDSAIQDIKKFADAVVVRKNSVFPVSESFTTGQTNLVE<br>RLQRFQLPVYVELFRNEFVSQPWDFLSDATVEINSHVTGAGINGTITEFPLTAARYKRNK<br>CLTRKDLPPYMSPVQPAGLLSIMSPTSLPPAEAPNPVFTDADVTEPPLPPVIAKAPTSSPGP<br>LSTDEKAPNGQTRVTLSSLSSAFAMVLASLLLL                                                                                                                                                                                                                                                                                                                                                                                                                                                                         |
| BrCAGP44 | Bra028979 | GDPD | MITSYMQDNPSMFVSRASKFLLSVLVLIQLLPTQLLAQRSKSPWQTLTGEAPLVIARGGF<br>SGLFPDSSFNAYSFVASTSAPDAVLWCDVQLTKDGVGICFPYVTMYNDSNVQEAYPKKK<br>NSYLLNGVPTQDWFTVDFTSRDLNTVFLTRGVLSRSNAFDNTQNVISTVQEVASEFKPA<br>GFWLNVQHDAFYTQHNLSMSSFLTVSKTVIIDYLSPEVSFFRNIGGRFGKTGPKFVFR<br>FLDKDDVEVSTNQTYGSLMKNLTFIKTFASGVLVPKSYIWPVKDQYLLPHTSFVRDAHT<br>AGLQVYGSGFANDFDIAYNYSYDPLTEYLSFMDNGDFSVDGFLSDFPLTASSAIDCFSHL<br>GSNASTQVDFLVISKNGANGDYPGSTDLAYTKAIKDGAIDIIDCAVQMSSDGIPFCLNSTN<br>LGESMNIVQTPFRNRSTTVPEFNLAGLYSFNLAWSEIQTLTPAISNPYSRNFHMFNRNPRE<br>RSSGKLVSLSEFLNLANNSSSLVGVLINVEHAAYLREKQGLDVVKAVLDTLKESGYSNAT<br>KRVMIQSSNSSVLVDIKKQSRYETVYQVEETIRDIQDSAIQDIKKFADAVVGRFSLYPISA<br>SFITGQTNLVERLQKFKLPVYVETERNEFVSQAYDFLSDATVEINTHVTGAGVSGTITEFP<br>LTAARYKRNRVCARKDTPVYMIPVRPAGLLEIVSPTFLPPAEAPNPVITDADVTEPPLPPV<br>TAKAPTTSPGPLPTDKKAPNGQTRVTL SVFLSAFDVVLASLLLL |
| BrCAGP45 | Bra035244 | GDPD | MPTSTVLLCCVVLIIQLFAGQTDARSSSPWQTLSGDAPLVIARGGFSGLFPDSSLNAYSFAV<br>QTSVPGSALWCDVQLTKDGAGICFPDLKLNNASTVEYVYPNRQKSYPVNGVSTQGWFT                                                                                                                                                                                                                                                                                                                                                                                                                                                                                                                                                                                                                                                                                                                  |

|          |           |      |                                                                                                                                                                                                                                                                                                                                                                                                                                                                                                                                                                                                                                                                                                                                                                  |
|----------|-----------|------|------------------------------------------------------------------------------------------------------------------------------------------------------------------------------------------------------------------------------------------------------------------------------------------------------------------------------------------------------------------------------------------------------------------------------------------------------------------------------------------------------------------------------------------------------------------------------------------------------------------------------------------------------------------------------------------------------------------------------------------------------------------|
|          |           |      | <p> IDFSLRDLNDVSLIRGILSRTEKFDGIYPILTVEDVTTQIKPESFWLNVQHDAFFEQQNLISM<br/> SKFLISASRIVSINYISSPEVNFFTKISGRFGRNGPLVFVFQFLRKEDIEPTTNQTYGSILSNLT<br/> FVKTFASGILVPKSYILPLDDKQYLVPPPKSLVQDAHKAGLQVYVSGFANDIDIAHDYSS<br/> DPVSEYLSFVDNGNFSVDGVLSDFPITASSSIDCFSHLGQNAIKQVNFLVISKNGASGDYP<br/> GCTDLAYDKAIKDGADVIDCSVQMSSDGVPFCRSIDLSNSTMISQTPFAQRSTLVPEISS<br/> SGGIYTFSLTWAEIRNLTPAIGNPYRSYTMFRNPNKKNNGSKLILLSEFLNLANNSTLLSGV<br/> LISVENAVYLREKQGLDVVKAVLDTLTETGYGNGTTKTKVMIQSTNSSVLVEFKKQSKY<br/> EAVYKVDEKISDISDAIEDIKKFANAVVIGKESVFSLLDSFITRQTNVVEKLQKSKLPVY<br/> VELFQNEFVSQPYDFFSDPTVEINSYILGAGINGTITEFPFTAARYKRNRC LGTQETLPPY<br/> MAPFKPGSLLQAVNAIPPAQAPNPVFTDDDVT EPLPPVTAKSPTS SPGTSFTNAQAPRPS<br/> GQTRLTSLRFSVFASLLLLWISSPLCS </p>                           |
| BrCAGP46 | Bra004101 | GDPD | <p> MGASRVLLCCVVLIIQLFAGQADAQRSSSPWQTLSGDAPLVIARGGFSGLFPDSSFNAYDF<br/> AKQTSVAGAALWCDVQLTKDGAGICFPDLKLNNASTVEDVYPNRQKTYSVNGVSTQG<br/> WFTIDFSLRDLISNVKLNRGILSRSEKFNGIYAIMTVEDVTTQIKPESFWLNVQYDAFYAQ<br/> HNLSMSSFLISASTTVSIDYISSPEVNFFKKIAGRFGRNGPSFVFQFLGKEDFEPTTNRTYG<br/> SILSNLTFVKTFASGILVPKSYILPLNDKQYLLLPPASLVLDAHKAGLQVYVSGFVNDNDI<br/> AHDYSSDPVSEYLSFVDNGNFSVDGVLSDFPITASASIVDFLVISKNGASGDYPGCTDMA<br/> YDKAIKDGADVIDCSVQMSSDGKPFCAHSIDLSNITNIAQTPFTKRSTHVPEISSNDGMY<br/> TFSLTWSEIQTLKPAISNPYRVYNMFRNPNNEKNSGKFILLSDFLNLAKTSTSLSGVLISVEK<br/> AVYLREKQGLDVVKAVLDTLTETGYSNGSTTKTKVMIQSTNSSVLVDFKKQSSKYETVY<br/> KVEEKIGDISDAIEDIKKFANAVVIGKETVFPLFDDGFIIRQTNVVEKLHKSKLPVYVEVF<br/> QNEFVSQPFDFSDPTVEINSYVSGAGIDGTITEFPFTAARYKRNRC LGTKESLAPPYMSPP </p> |

|                 |                  |                                  |                                                                                                                                                                                                                                                                                                                                                                                                                                                                                                                                                                                                                                                                                                                                                                                                                      |
|-----------------|------------------|----------------------------------|----------------------------------------------------------------------------------------------------------------------------------------------------------------------------------------------------------------------------------------------------------------------------------------------------------------------------------------------------------------------------------------------------------------------------------------------------------------------------------------------------------------------------------------------------------------------------------------------------------------------------------------------------------------------------------------------------------------------------------------------------------------------------------------------------------------------|
|                 |                  |                                  | VRPGFFLNLVNAIPPAQAPNPVFTDDDVTPLPPVTAKSPTSSPGTSFTNAQAPRPSGQTRLTSLRLSVFASLLLL                                                                                                                                                                                                                                                                                                                                                                                                                                                                                                                                                                                                                                                                                                                                          |
| <i>BrCAGP47</i> | Bra034037        | GDPD                             | <p> MRASTVLLSSVLIQLFAAQIDAKSSRSPWQTLSGDAPLVIARGGFSGLFDPDSSSVAYKFA<br/> KQTSVADLFPNRQNFYPVNGVTSQGWFTIDFSLRDLKNASLIRGIFSRSEKFDGNGYSILT<br/> VQDVSMQIKPESFWLNIQHDAFYAQHNLSISSFLISASRTVSDYISSPKLNFFSKVKGRF<br/> WRNEPSFVFQFLGKEEFETTKRTYGSILSNLTYVKTFASGILVPKSYILPLDDKQYLLPPT<br/> SLVQDAHKAGLKLYVSGFANDVDIAYNYSFDPVSEYLSFVNNGYFSVDGVLSDFPITAST<br/> SIDCFSHIGRNARKQMDFLVITKNGASGDYPGCTDLAYEKAIQDGADVIDCSVKMSSDG<br/> KPFCSSSIDLTQSTMVIQSPFRNRSTIIPDISSDPGIYTFNLTWPEIQSLTPAIMNPYRSYNMF<br/> RNPNEKNSGRIISLSEFLHLANKSTSIYGVLSVEYVVYLREKQGLDVVKAVLDTLTETGY<br/> SNGTSTTKVMIQSTHSSVLVDFKKKSKYETVYKVEETIRDISDSAIEDIKKFANAVVIGKS<br/> SVFPDVGSFVTGQTNVVERLRKSKLPVYVELFQNEFVSQPYDFCSDATVEINTYITGAGI<br/> NGTITEFPLTASRYKRNQCLGRKETPSYMSPIKPGILLSLANPRSLPPAEAPYPVFTEDDVT<br/> ESPPQPPGTEKSPSSSTNAQTHRPSGQTRLTSLRLSVFASLLLL </p> |
| <i>BrCAGP48</i> | <i>Bra034311</i> | Protein kinase (Pkinase) and LRR | <p> MAATSLVLTCFFSIFLLTHRNVNSESLEKQALLTFLQQIPHENRLQWNESDSACNWVGVE<br/> CSSDRTSVHSLRLPGTGLVGQIPSGSLGKLSQLRVLSLRNRLSGQIPPDFSNLTHLRSLYL<br/> QNNEFSGEFPASVTQLTGLVRLDISSNNLTGPIPFVSVNNLTQLTGLFLGNNRFSGNLPSITV<br/> DLTDFNVSVNNLNGSIPTSLSKFPAASFAGNVNLCGGPLKPKCSFFVSPSPSPSPDAPLSG<br/> KKSKLSTAAIIAIAVAGAVVGLLVLALLFLCLRKRRRGKEGGTKAAETTATTRSVPSVPP<br/> AGGASSSKEVTGTSSGMGGETERNKLVFTEGGVFSFDLEDLLRASA EVLGKGSVGTSYK<br/> AVLEEGTTVVVKRLKDVAASKKEFESQMEVVVGKIKHPNVFPLRAYYSKDEKLLVDFD </p>                                                                                                                                                                                                                                                                                                                                 |

|                 |                  |                                                     |                                                                                                                                                                                                                                                                                                                                                                                                                                                                                                                                                                                                                                                                                                         |
|-----------------|------------------|-----------------------------------------------------|---------------------------------------------------------------------------------------------------------------------------------------------------------------------------------------------------------------------------------------------------------------------------------------------------------------------------------------------------------------------------------------------------------------------------------------------------------------------------------------------------------------------------------------------------------------------------------------------------------------------------------------------------------------------------------------------------------|
|                 |                  |                                                     | MPNGSL SALLHGSRGSGRTPLDWDNRMRIAITAARGLAHLHVS AKLVHGNIKASNILLH<br>PNQDTCVSDYGLNQLFSNSSPPNRLAGYHAPEVLETRKVTFKSDVYSFGVLLLELLTGK<br>SPNQASLGEEGIDLPRWVLSV VREEWTAEVFDVELMRYHNIEEEMVQLLQIAMACVST<br>VPDQRPVMQEVL RMIEDVNRSETTDEGLRQSSDDPSKGSEGQTPPGESRTPPRSVTP                                                                                                                                                                                                                                                                                                                                                                                                                                               |
| <i>BrCAGP49</i> | Bra012045        | Pkinase and<br>LRR                                  | MG AISLVLS CFVSILLTDRVSSESPEEKQALLAFLQQT PHENRLQWNASDSACTWVGVE<br>CNSDRSSIYSLRLPGTGLVGQIPSGTLGKLTQLRVLSLRSNRLSGQIPPDFKNLTHLRSLYL<br>QHNELSGEFPASITQLTGLVRLDISSNNLTGSIPFAVNNLTLLTGLFLGNNRFSGNLPSITVG<br>LTDFNVS VNNLNGSIPSSLSKFPAASFAGNVNLCGGPLRPCKSFFISPSPSDDAPSPSRLS<br>GKKSKLSTAAIIAISVASALIGLLLLALVFFLCLRKRRRGGSRTKQTKPAETTTTRNVPPEGI<br>PPAGGASSSKDDL RASA EVLGKGSVGTSYKAVLEEGTTVVVKRLKDVAASKKEFESQ<br>MEVVGKTKHPNVVPLRAYYYSKDEKLLVFD FMPSGSLSALLHGSRGSGRTPLDWDNR<br>MRIAITAARGLAHLHVS AKLVHGNIKASNILLQPNQDTCVSDYGLNQLFSNSTPPNRLAG<br>YHAPEVLETRKVTFKSDVYSFGVLLLELLTGKSPNQASLGEEGIDLPRWVLSV VREEWT<br>AEVFDVELMRYHNIEEEMVQLLQIAMACVSTVPDQRPVMQEVL RMIEDVNRSETTDDG<br>LRQSSDDPSKGSEGQTPPGESRTPPRSVTP |
| <i>BrCAGP50</i> | <i>Bra019320</i> | Pkinase and<br>Gnk2-homolog<br>ous (GNK2)<br>domain | MSSCTSFIVLVLF SLLASYRAYAQNP HYTYHSCSNTTTYTRNSTYSTNLKTLSSLSSPDA<br>SYSTGFQ NATVGRDPDRVTGLFLCRGDVSPEVCRSCVAYS VNETLSRCPNEKEVVLYYE<br>ECMLRYSHRNILSTLVYEGGFFMFNGNISSNQEDRFEDLVSTTMNQAADKAANS SRKFY<br>TIKANWTALQSLYGLVQCTPDLTRYDCLRLHQSIDGIPLNRIGGR LFWPSCNARYELYLF<br>FNENDTRTPLEQHAPPPQPSP LPPPPASTSPVSSLTRTGKHHENSKVLIVAIVVGIVVAVLI<br>FIAGYCF LAKRTKKTSDNAPAFYGDDITTIESLQLDYVIIQAATNNYSENNKIGEGGFGEV                                                                                                                                                                                                                                                                                                   |



|                 |           |                     |                                                                                                                                                                                                                                                                                                                                                                                                                                                                                                                                                                                                                                                                                                                                                                   |
|-----------------|-----------|---------------------|-------------------------------------------------------------------------------------------------------------------------------------------------------------------------------------------------------------------------------------------------------------------------------------------------------------------------------------------------------------------------------------------------------------------------------------------------------------------------------------------------------------------------------------------------------------------------------------------------------------------------------------------------------------------------------------------------------------------------------------------------------------------|
|                 |           |                     | YKGTfangvevavkrlskssrqdtefknevavvaklqhrnlvrllgfsleqkerilvy<br>eyvpnkslDYFLFDPAKHGQLNWTLRYKIIegITRGILYLHQDSRLTIIHRDLKASNILLDR<br>NMNPKVADFGMARIFGMDQTQDNTSKIVGTYGYMSPEYALHGQFSMKSDVYSFGVLV<br>LEISGMKNNSFYeidGAHDLVTYAWKLWGNGTALNLVDPIIIDNCHNSEVVRciHIGLLC<br>VQEDPVDRPTFSTIFVMLTSDTVTLVPVRQPGFFVQSRPERDPLDSDQSTTTKSDPTSVD<br>ASITDIYSR                                                                                                                                                                                                                                                                                                                                                                                                                            |
| <i>BrCAGP51</i> | Bra019323 | Pkinase and<br>GNK2 | <u>MSSRASFI</u> FLFLYSFLT <u>SFRATAEIP</u> IFVHHYCRNTTRYTANSIYFTNLKTLWSSLSTNA<br>SYSTGFQ <sup>1</sup> NATAGQARDMITGLFLCRGDVSLEVCRDCVSYSVKDIVRKCPNQREATIYYD<br>QCMLRYSDRNIFSNVTLDDGFIMYNDHYDIPSAEQARFENLVLTMTMIELAFEANSSRHF<br>CTRETKWNDYQDLYVLVQCTPDLTRQDCFRCLDRSINELYFSTIGERYLYPSCNSRYEFY<br>KFYNETLLPPPPLA <sup>2</sup> AP <sup>3</sup> TPPVSS <sup>4</sup> APRPRDDITTIDSLQLDYRTIQAATNDYSENNKIGRGGFG<br>EVYKGTFLNGTEVAVKRLSKSSGQGETEFKNEVVVAKLQHRNLVKLMGFSLEREERIL<br>VYEYVPNKSLDYFLFDPTKKGKLCWTRRYKIIEGVARGMLYLHQDSRLTIIHRDLKASNI<br>LLDADMNPKIADFGMARIFGMDQTQENTNRIVGTYGYMSPEYAMHGQFSMKSDVYSF<br>GVLVLEIMTGRKNSSFYERDGAHNLVTYAWRLWTNKTELDLVDPVIVYNCQKSEVVRci<br>HVGLLCVQEDPVERPTFSTILQMLTSNNVIL <sup>5</sup> PVPQQPGFVIQARPKRDLPSDQSTMTKC<br>ATRSVGDasVTDLYPR |
| <i>BrCAGP52</i> | Bra019322 | Pkinase and<br>GNK2 | <u>MCSWASLI</u> FLFIFSFLT <u>SFKASAQDPI</u> YVYHICPNTTTYTRNSTYSTNLRTLLSSLSSSNSSY<br>STGFQTAISGQGTDSVTGLFLCRGDVSPEVCRRCVAFVNDTSTRCPNQREVVLYYDVC<br>TVRYSNRNILSTLSTDGGVVLWNTQNITSNQKDQFRDLVLSTMNQAANEAAADSRRKFD<br>ARKANWTASQSLYGLVQCTPDLTRQDCLSLQQSINQLPTDKIGGRFIMHSCGSRYELYA                                                                                                                                                                                                                                                                                                                                                                                                                                                                                      |

|                 |           |                     |                                                                                                                                                                                                                                                                                                                                                                                                                                                                                                                                     |
|-----------------|-----------|---------------------|-------------------------------------------------------------------------------------------------------------------------------------------------------------------------------------------------------------------------------------------------------------------------------------------------------------------------------------------------------------------------------------------------------------------------------------------------------------------------------------------------------------------------------------|
|                 |           |                     | <p>FYNESAITTPPLPPQPPVSTPPVSAAPPAGKGGSSSVLVVAIVVPIIVVLLLIACYCFLAKR<br/> AKKTYGTASAFDGGDDITTAESLQLDYRSIQATATNGFSESNKIGQGGFGEVYKGTLSDGTE<br/> VAVKRLSKSSGQGDAEFKNEVILVAKLQHRNLVRLLGFCLEGEERVLVYEVVPNESLDYF<br/> IFDLAKQTQLDWSRRYKIIGGIARGILYLHQDSRLTIIHRDLKASNVLLDSDMNPKIADFG<br/> MARIFGMNQTEENTSRIVGTYGYMSPEYAMHGQYSMKSDVYSFGVLVLEIISGKKNSSF<br/> YQTDGAHDLVSYAWRLWSNGTPLDLVDPIVDNCQRNEVVRCVHIGLLCVQEDPVERPP<br/> FSTIVLMLSSNTVTLPVPRQPGLFFQSRLGKDPLDSDKFTTTKSLLSVDDASITDVYPR</p>                                                    |
| <i>BrCAGP53</i> | Bra019321 | GNK2                | <p>MLRYSYRNILSTAIYNEGGVIRLNNNVSSNQEDRFQVLVSTTMNQAADKAANSSRKFYT<br/> IKANWTALETLYGLVQCTPDLSRYDCLRCLHQSIDGMPLNKIGGTLIWPCSNARYELYLF<br/> FNETGTGTPPEQQAPPLQRLPPPPASTSPASSLPRPGKHWNFKMVIVAIVVAIVVAVLLS<br/> IAGYCFLAKRTKKTSDNAPAFYGNDITTIESLQLDYRIIQAATNNYSENNKIGQGGFGEVY<br/> KCLGNQVFFVQSRSGRDPLDSDQSTTTKSDPTSVDDASITDIYSR</p>                                                                                                                                                                                                        |
| <i>BrCAGP54</i> | Bra019319 | Pkinase and<br>GNK2 | <p>MEPVIQSLEAEPVIQVTLSDFDNAWEALMRRVIAEATSSSSGSNTMYYGADRQQLGTSR<br/> SIYGFVQCSKDISPSKCEQCLRKNVDDYRSCCSGRQRGITERPSCFMRWDLDPFFGLFED<br/> NIAPAPTTPPEKGDRKIPIGVVVGITGVLTFFVISMLLSLGVALCIRRKAHQENGNESEQEFK<br/> NEVLLVAKLQHRNLVRLLGFSVEGAERILVYEFVPNKSLNYFLFDPVKRSQLDWRKRYN<br/> IITGIMLYLHQDSRLTVVHRDLKASNILLDVDMNPKIADFGFLARNFRMNQTEANTGRVV<br/> GTVGYMPPEYVANGQFSMKSDVYSFGVLILEIIGGKKNSSFHKIDGSLRNLVTYVWRLW<br/> NNESLLELVDPAVGENDYDKHEVTRCIHIGLLCVQENPADRPTMSTIFQMLTNTSITLHVQPQ<br/> PPGFFFRDGA SPLAEGLTIGQSSIMSFACSVDDASITSVNPR</p> |

|                 |                  |                     |                                                                                                                                                                                                                                                                                                                                                                                                                                                                                                                                                                                                                                                                                                                                                                                                                                                                               |
|-----------------|------------------|---------------------|-------------------------------------------------------------------------------------------------------------------------------------------------------------------------------------------------------------------------------------------------------------------------------------------------------------------------------------------------------------------------------------------------------------------------------------------------------------------------------------------------------------------------------------------------------------------------------------------------------------------------------------------------------------------------------------------------------------------------------------------------------------------------------------------------------------------------------------------------------------------------------|
| <i>BrCAGP55</i> | <i>Bra011048</i> | Pkinase and<br>GNK2 | <p> <u>MASTLLLASFAVFLTLTLTPSPSTSTEVSRL</u><u>LDVLGWVCNNGSVDPQEAYRRSYQINIDKT</u><br/> <u>RDDMRKLKFGTHEDGVPPQKMYFLSQCVSDLSPDECSCWSRATDLLFNCFPSPGGRFY</u><br/> <u>LDGCFVRADNYSFYREPVTRQDSKICGGDESSSSREFKGLVKEVTKSIVDTAPYSQGFSV</u><br/> <u>VARKSVHGLTAYGLGICRQTLDEELCQLCLADGALSATSCSPATEAFVMNAGCYLRYSN</u><br/> <u>YTFYNERELLSMSLTKEHVLRLVISMVCVLAIASGFWCGKCIYLGASSKKKLKEKESKS</u><br/> <u>VSNNSNLMCFKYSTLEKATNNF</u><u>NESCKLGVGGYGEVFKGTLSDGREIAIKRLHISGNKT</u><br/> <u>REEIHNEIDVISRCQHKNLVRIGCCFTNMNSFIIYEFLANSSLDHILFNPEKKKELEWKKR</u><br/> <u>RAIILGTAEGLEYLHEACKIIHRDIKASNILLDLKYKPKISDFGLAKFYPEGGKDIPSSSPSP</u><br/> <u>SPSPIAGTLGYMAPEYISKGILSNKIDAYSFGVLVLEITSGFRNNKFRSDNSLETTLVTQVW</u><br/> <u>KCYASDKMEEMIDKDMEEETDKTEVKRVMQIGLLCTQESPQLRPTMSKLVGDSIAIAVIR</u><br/> QNRNRLPACSLCNSSRNRI<u>TPSP</u>TVSLHLLCRNPLGEIETV<u>SP</u>HLEIETISLHLLSEHRPKR<br/> GTCSSSVV </p> |
| <i>BrCAGP56</i> | <i>Bra032175</i> | Pkinase and<br>LRR  | <p> <u>MKTELVSPILFFFSFSCLLLVSSGL</u><u>NSDGVLLMSFKYSVLLDPLSLLQSWSYDHDNPCSW</u><br/> <u>RGVLCN</u>NDFRVVTLSLPNSKLAGSIPSDLGFLQ<u>NLQSLDLSNNSLNGSLP</u>VEFFAAGELR<br/> FLDLSNNLFSGEIPATVGDMHNLQTLNLSDNILAGKLPANLASLESLTEVSLKNNYFSGEL<br/> PGGWRSVQFLDISSNLINGSLPPDFSGDSLRYLNVSYNQISGEVPPDVGDGFPRNATVDFS<br/> FNNLTGSIPD<u>SP</u>VFLNQKSISFSGNPGLCG<u>AP</u>TRNPCPISS<u>SP</u>AAVT<u>TP</u>ST<u>TP</u>ALAAIPKTFGS<br/> NPESDSV<u>GP</u>ENNKSNNRRTGLRPGVIIGIIVGDIAGIGILALVFFYVYRYKKKNNMQKNTHS<br/> LEANEVKDTTSL<u>SP</u>SSSTTTSSS<u>SP</u>EQSNRFVKWSCLRKSQETDETEEEDEEEHHQ<u>GP</u>GE<br/> TKKGTLVTIDGGEKELEVETLLKASVYILGATGSSIMYKTVLEDGTVLAVRRLGENGMS<br/> <u>QQRFRKDLEAHVRAIGKLVHPNLVRLRGFYWGTDEKLVYDFVPNGSLVNARYRKGS</u><br/> <u>SPCHLPWETRLKIAKGLARGLAYLHEKKHVHGLKPSNILLGQDMEPKIGDFGLERLLA</u> </p>                                                                             |

|                 |                  |                 |                                                                                                                                                                                                                                                                                                                                                                                                                                                                                                                                                                                                                                                                                                                                                                                                                                                                                                                                   |
|-----------------|------------------|-----------------|-----------------------------------------------------------------------------------------------------------------------------------------------------------------------------------------------------------------------------------------------------------------------------------------------------------------------------------------------------------------------------------------------------------------------------------------------------------------------------------------------------------------------------------------------------------------------------------------------------------------------------------------------------------------------------------------------------------------------------------------------------------------------------------------------------------------------------------------------------------------------------------------------------------------------------------|
|                 |                  |                 | <p>GDTSYNRASGSSRIFSSKRSASASTREFGTPSPSPSSVGPVSPYCAPESLRNLKPNPKWD<br/> VFGFGVILLELLTGKIVSVDEVGIGNGLTVDDGNRALIMADV AIRSELEGKEDLLLGLFKL<br/> GYSCASQVPQKRPTMKDALVVFERFPMSSSAKSPSYRYGHY</p>                                                                                                                                                                                                                                                                                                                                                                                                                                                                                                                                                                                                                                                                                                                                            |
| <i>BrCAGP57</i> | <i>Bra019878</i> | Pkinase and LRR | <p>MIFTSRQVFFVLSVLALTTMPFSAGVTNLRDVSAINNLYITLGA<sup>PS</sup>SLHRWLAFGGDPCGE<br/> KWQGVVCDSSNITEISIRGMKVGGSLSDTLADFSSIQVMDFSDNHISGTIPQALPS<sup>TIRNL</sup><br/> SLSSNRFTGNIPFTLSFTELSELSLGNNVLSGEIPDYFQQLTKLTKLDLSANILEGRLPPSM<br/> GDLAALKILKDGT<sup>TP</sup>FNTSII<sup>TPPPP</sup>AADPPPATHH<sup>APPL</sup>LPRVPPVSNVPP<sup>APFAP</sup>LLPPPPPLV<br/> W<sup>SPP</sup>SDNVGGDPWNSGSGQPTLQI<sup>SPP</sup>SGSGSGKFWSTQRIILVVSSVAIIVLVSGLCVTL<br/> WRCCRGKKYNRYGADARKDLQRPYFNKPPSQP<sup>TP</sup>TLGKVSREPMVKPYDGYGGGDRK<br/> YGYPMPPPRPEESRRAIPPASYYNKDVQKPLQQPPRRFQSNDDSAASKRAAHFPPGLNSS<br/> SSATVFTVASLQQYTNGFS<sup>EELIIGEGSLGNVYRAVFPHGKYLA</sup>VKKLSNTINKTQSDGEF<br/> LNLVSNVLKLKRGNILEFLGYCNEYGQRLVYEYCPNGSLQDALHLDRKLHKKLTWNV<br/> RINIALGASKALQFLHEVCQPPVHQNFKSSKVLLDEKLSVRVADSGLAYMLPPRPTSQV<br/> AGYAAPEVEYGSYTCQSDVYSLGVVMLELLTGRRPFDRTRPRGHQTLAQWAIPRLHDID<br/> ALTRMVDPSLHGAYPKKSLSRFADIISRLQMEPGFRPPVSEIVQDLQHMI</p> |
| <i>BrCAGP58</i> | <i>Bra002639</i> | Pkinase         | <p>MESPMRFNLRTAFSIIFLTFLPLNLKSQEVFDPSQDHS LIQSEASWNRRSLVE<sup>TPPLPGK</sup><sup>GP</sup><br/> AVGA<sup>SPPSP</sup>DQAFEGSTKPPP<sup>APETQ</sup><sup>TPP</sup>GGDGT<sup>TP</sup>SPPSSSVRTAQ<sup>TPNPPSEPPPQLL</sup><sup>SPPP</sup><br/> RTKKTHNISMIVGIVGVFTVSVALIIFFLIHTRKIPKWTNSGQLQNALITGNHTLFNVP<br/> RMQLSELRAAC<sup>EDFSNIIGSFSDGTIYKGTLSTGAEIAVVSIAAGSRANWSTD</sup>METQLLQ<br/> KIRKLSKVDHKNFLNVIGYCHENEPFHRMLVFEYAPNGTLSEHLHSQHTEHLDWPTRLRI<br/> FMGIAYCLEMHMNLNPPILHTNLDSSCIYLTEDNAAKVSDFSVLNFISSKESSSSKNLLE</p>                                                                                                                                                                                                                                                                                                                                                                                                            |

|                 |                  |                                            |                                                                                                                                                                                                                                                                                                                                                                                                                                                                                                                                                                                                                                                                                                                                                                                                                                                                                                    |
|-----------------|------------------|--------------------------------------------|----------------------------------------------------------------------------------------------------------------------------------------------------------------------------------------------------------------------------------------------------------------------------------------------------------------------------------------------------------------------------------------------------------------------------------------------------------------------------------------------------------------------------------------------------------------------------------------------------------------------------------------------------------------------------------------------------------------------------------------------------------------------------------------------------------------------------------------------------------------------------------------------------|
|                 |                  |                                            | HSTLDPQTNVLNFGALVFEIITGRLPDPDSLFLEPKPARDLVDPTLKTFFQEDVAERLLGVV<br>RQCMNPYSAQRPTMRKVVKLREII <sup>SP</sup> GIEADAALPRL <sup>SP</sup> RWWSEMEIITTDGN                                                                                                                                                                                                                                                                                                                                                                                                                                                                                                                                                                                                                                                                                                                                                  |
| <i>BrCAGP59</i> | <i>Bra029710</i> | Pkinase                                    | MEAVGRISPHGNVAPLRAYYFSKDEKLLVYDYYQGGNFSMLLHGNNEGGRGALDWEQ<br>RLKICLGAAGIAHIHSSSGAKLLHGNIKSPNVLLTQDLNACVSDYGIAPLMSSHHTLLPS<br>RSLGYRAPEAIETRKHTQKSDVYSFGVLLLEMLTGKAAGKTTGHEEVVDLPKWVQSVV<br>REEWTGEVFDVELIKQQHNVEEEMVQMLQVAMACVSKHPDSRPSMEEVVMNMMEEV<br>RPSNGSGAGSGNRAS <sup>SP</sup> EMIRSSD <sup>SP</sup> V                                                                                                                                                                                                                                                                                                                                                                                                                                                                                                                                                                                       |
| <i>BrCAGP60</i> | <i>Bra040054</i> | Pkinase and<br>LRR<br>N-terminal<br>domain | MPLLKVIPPLSLSIYSIQRSASNATSQD <sup>SP</sup> MNPPQRSADI <sup>SP</sup> DSDKQALLEFASLVPHARKLN<br>WNTTNPICTSWTGITCSKNNSRVLTALRLPGSGLY <sup>GP</sup> LDPKTFEKLDALRIISLRNNLQGN<br>IPLTILSLPFIRSLYFHDNNFSGTIPPTL <sup>SP</sup> RLVNLDLSNNSLSGNIPASLRSLTQLTDLNLQ<br>NSLT <sup>GP</sup> IPDLPPNLKYLNLFSNNLNGSVPSLKSFPASSFQGNLLCG <sup>SP</sup> LT <sup>SP</sup> CPDNTT <sup>SP</sup> APA<br>KKVLSTAAIVGIAVGGSVLLFILLAVITLCCA <sup>SP</sup> KRDDNGQDSTST <sup>SP</sup> AKAKTIRSDNKAEFF<br>GSGVQEPEKNKLVEFEGSSYNFDLEDLL <sup>SP</sup> RASAEVLGKGSYGTTYKAILEEGTTVVVKRL<br>REVAAGKREFEQKMEAVGRISPHVNVAPLRAYYFSKDEKLLVFDYYQGGNFSLLLHGN<br>EGGRAALDWETRLKICLGAAGGISHIHSASGAKLLHGNIKSPNVLLTQDLNACVSDYSIA<br>PLMSSHHTLLPSRSLGYRAPEAIETRKHTKSDVYSFGVLLLEMLTGKAAGKTAGHEELV<br>DLPKWVQSVVREEWTGEVFDVELIKQQHNVEEEMVQTLQIAMACVSRHPDSRPSMEE<br>VVMNMMEEIRASTGS <sup>GP</sup> GSANRAS <sup>SP</sup> EMIRSSD <sup>SP</sup> V |
| <i>BrCAGP61</i> | <i>Bra013336</i> | Pkinase and<br>LRR                         | MGCGFHYSYVFFLIITLQAPLSFSV <sup>NS</sup> QEYTLLKFRERVNSDPHGTLANWNISDLCSWS<br>GVTCVDGNVQILDLSGCSLGGTL <sup>AP</sup> EFNQELRLSLILSKNHFFGEIPKEYESFS <sup>SP</sup> KLEFLDL<br>RDNDLTGTIPPELTNLSLKHLLSGNKFQSDMSIKILRMKLLH <sup>SP</sup> FAVLGCANRKLGHCS                                                                                                                                                                                                                                                                                                                                                                                                                                                                                                                                                                                                                                                  |

|                 |                  |                 |                                                                                                                                                                                                                                                                                                                                                                                                                                                                                                                                                                                                                                                                                                                                                                                                                                                                                                                                                                                               |
|-----------------|------------------|-----------------|-----------------------------------------------------------------------------------------------------------------------------------------------------------------------------------------------------------------------------------------------------------------------------------------------------------------------------------------------------------------------------------------------------------------------------------------------------------------------------------------------------------------------------------------------------------------------------------------------------------------------------------------------------------------------------------------------------------------------------------------------------------------------------------------------------------------------------------------------------------------------------------------------------------------------------------------------------------------------------------------------|
|                 |                  |                 | <p> RNHIIRVKKIEAFVFRIKATSRRLKAFPSKFDKRRELLEETSNLAAEPAPQAPSPSPETIT<br/> EASPRSSGSFPAVTNAKKRIPPLVPPPPSPDENTSSDSSKNQPQDNKQSKGSKHVWLYVVI<br/> AVASFLGLLIIVAVIFLCRKRAVKSIGPWKTGLSGQLQKAFVTGVPKLNRAELETACEDFS<br/> NIETFDGYTVYKGTLSGVEIAVASTAVCESKEWTRAMEMAYRRTIDALSRINHKNFVN<br/> LIGYCEEDEPFNRMMVFEYAPNGTLFEHLHDKEMEHLDWASARMRIIMGTAYCLQHMHE<br/> MNPPMAHSDFNSSEIYLTDDYAAKVSEIPFNLEARLNPKKHVSGDLEQASLLLPPEPETN<br/> VHSFGLLMLEIISGKLSFSDEYGSIEQWASKHLENDLDEMVDPSLKTFFKEEELEVICYVI<br/> RECLKPDQRHRPSMKDVAEQLKQVINITPEKATPRSSPLWWAELEILSSEAT </p>                                                                                                                                                                                                                                                                                                                                                                                                                                                  |
| <i>BrCAGP62</i> | <i>Bra011747</i> | Pkinase and LRR | <p> MKMQLITAFFFFFLLCFVLGSSGLSPDGLLLMNFKSSVLVDPLSLLQTNWYNHETPCSW<br/> RGVSCNNDISKVINLSLPNSHLLGSIHSDLGSLRSLQSLDLSNNSFNGLPVSLFNGTELRS<br/> LDLSGNMISGEVPASIGDLHSLQTLNLSDNALAGKLPANLVTLRNLTAVSLRSNYFSGEIP<br/> GGWRDVQFLDLSSNLINGSLPPDFGGA<del>SLRYLNVSFNQISGE</del>IPPEIGANFPINATVDLSFN<br/> NLTGSIPD<del>SP</del>VFLNQKSIFFSGNPGLCGDPCPISS<del>SP</del>STISDAD<del>SP</del>TS<del>TP</del>AIAAIPNTISSNPVT<br/> NPTTQQTNR<del>TP</del>RTGLRPVVITGIVIGDIAGIGILAVIFLYIYRRKKNIANNNDKQREETD<br/> TITL<del>SP</del>SSSSSS<del>SP</del>DESRRFTKWSCLRKDPET<del>TP</del>SDEESGYNADQSRSDSEGLTVTDGEK<br/> EMEIETLLKASAYILGARGSSIMYKAVLEDGTVYAVRRLGETGLTQRRFKDFESNIRAIGK<br/> LVHPNLVRLRGFYWGIDEKLVYDFVPNGSLVNPRYRKGGGASSPYHLPWETRLKIARGI<br/> ARGLAYLHEKKHVHGNLKPSSVLLGHDTEPRIGDLGLERLLTGETSYSRAGGSSRIFGSK<br/> RSRGSSLDFFSIGPTPSPSPSSLGPLSPYCAPESFRSLKPSPKWDVFGFGMILLELLTGKVL<br/> AEEVGLGIGLTVEDGHHALRMVDVTIRGELLGKEDFLLGCLKLGYNCASPIPQKRPTMK<br/> ESLAVLERF<del>TP</del>SSDVVK<del>SP</del>SFHYMNH </p> |

|                 |                  |                                   |                                                                                                                                                                                                                                                                                                                                                                                                                                                                                                                                                                                         |
|-----------------|------------------|-----------------------------------|-----------------------------------------------------------------------------------------------------------------------------------------------------------------------------------------------------------------------------------------------------------------------------------------------------------------------------------------------------------------------------------------------------------------------------------------------------------------------------------------------------------------------------------------------------------------------------------------|
| <i>BrCAGP63</i> | Bra036670        | Pkinase                           | <p>MSCFSCFSSKNLENEGSSLPAPYRQTGSPNNQRERTREVVANNAPSQSNNIEAQGFSFRE<br/> LATATNNFKLENLIGEGGFGRVYKGKLNKTGQVVAVKQLDRNGLQGQKEFLVEVLMLS<br/> LLHHSNLVNLIGYCADGDQRLLVYEYMPGSGVEDHLLDLEPDQKPLDWNRSRIKIALGAA<br/> KGLEYLHDKANPPVIYRDLKSSNLLLDQDFDTKLSDFGGLAKLGPTGDTLHVSSRVMGTY<br/> GYCAPEYQRTGHLTVKSDVYSFGVVLELITGRRVIDTMRPSHEINLVTWAQPIFRDPTRF<br/> PQLADPLLRRGEFPEKSLNQAVAVAAMCLNEEPMVRPLISDVVTALSFLGASSDFSADSS<br/> HLQQNPSEIYHDAVQWDSSPR</p>                                                                                                                                                  |
| <i>BrCAGP64</i> | <i>Bra011439</i> | Pkinase and LRR N-terminal domain | <p>MERRLMKIARFFWLVLVFDLVLRTSGNAEGDALSALKNSLSDPNKVLQSWDATLVTPCT<br/> WFHVTCNSNSVTRVDLGNANLSGQLVTQLGQLPNLQYFFANTNLTPLPASPPPISTPP<br/> SPAGSNRITGAIAGGVAAGAALLFAVPAIALALWRRKKPQDHFFDVP AEEDPEVHLGQLK<br/> RFSRELQVASDNFSNRNILGRGGFWKVYKGRLADGTLVAVKRLKEERTQGGELQFQTE<br/> VEMISMAVHRNLLRLRGFCMTPTERLLVYPYMANGSVASCLDRPESQPPLDWPKRQRI<br/> ALGSARGLAYLHDHCDPKIIHRDVKAANILLDEDFAVVGDFGLAKLMDYKDTHVTTA<br/> VRGTIGHIAPEYLSGKSSEKTDVFGYGVMLLELITGQRAFDLARLANDDDVMLLDWV<br/> KGLLKEKKLEALVDVDLQGNIDEVEQLIQVALLCTQSSPMERPCKMSEVVRMLEGDG<br/> VAERWEEWQKEEMFRQDFSQYNQNPNTAWLIGDSTSHIENDYPSGPR</p> |
| <i>BrCAGP65</i> | <i>Bra037006</i> | Pkinase                           | <p>MVFCYWWFRRLNNNSLSGEIPRSLTAVSSLQVLDLSNNPLTGDIPVNGSFSLSFTPISFANT<br/> KLTPLPASPPPLSPTTPSPAGSNRITGAIAGGVAAGAALLFAVPAIALALWRRKKPQEHFF<br/> DVPAEEDPEVHLGQLKRFSRELQVASDNFSNKNILGRGGFCKVYKGRLADGTLVAVKR<br/> LKEERTQGGELQFQTEVEMISMAVHRNLLRLRGFCMTPTERLLVYPYMANGSVASCLRE<br/> RPESQPPLDWPKRQRIALGSARGLAYLHDHCDPKIIHRDVKAANILLDEDFAVVGDFGL</p>                                                                                                                                                                                                                                              |

|                 |                  |                                            |                                                                                                                                                                                                                                                                                                                                                                                                                                                                                                                                                                                                                        |
|-----------------|------------------|--------------------------------------------|------------------------------------------------------------------------------------------------------------------------------------------------------------------------------------------------------------------------------------------------------------------------------------------------------------------------------------------------------------------------------------------------------------------------------------------------------------------------------------------------------------------------------------------------------------------------------------------------------------------------|
|                 |                  |                                            | AKLMDYKDTHVTTAVRGITIGHIAPEYLSTGKSSEKTDVFGYGVMLLELITGQRAFDLAR<br>LANDDDVMLLDWVKGLLKEKKLEALVDVDLQGNIDEVEKLIQVALLCTQSSPMERP<br>KMSEVVRMLEGDGLAERWEEWQKEEMFRQDFNYQNYNQPNNTSWLIGDSTSHIENEYP<br>SGPR                                                                                                                                                                                                                                                                                                                                                                                                                         |
| <i>BrCAGP66</i> | <i>Bra034562</i> | Pkinase and<br>LRR<br>N-terminal<br>domain | MRGMMKPSFLWLLLVDLVLRVAGNAEGDALSALKNSLADPNKVLQSWDATLVTPCT<br>WFHVTCNSDNSVTRVDLGNANLSGQLVMQLGQLPNLQYLELYSNNITGTIPETLGNLTE<br>LVSLDLYLNNLSGPIPKSLGRLQKLRFFFANTNLTPLPASPPPISTPPSPGGSNRITGAIAG<br>GVAAGAALLFAVPAIALALWRRKTPQDHFFDVPAAEDPEVHLGQLKRFSRELQVASDN<br>FSNRNILGRGGFGKVKYKGRADSTLVAIKRLKEERTQGGELQFQTEVEMISMAVHRNLL<br>RLRGFCMTPTERLLVYPYMANGSVASCLRDRPESQPALDWPKRQGIALGSARGLAYLHD<br>HCDPKIIHRDVKAANILLDEDFEAVVGDFGLAKLMDYKDTHVTTAVRGITIGHIAPEYLST<br>GKSSEKTDVFGYGVMLLELITGQRAFDLARLANDDDVMLLDWVKGLLKEKKLEALVD<br>VDLQGNIDEVEKLIQVALLCTQSSPMERP<br>KMSEVVRMLEGDGLAERWEEWQKEEMFRQDFNYQNYNQPNNTSWLIGDSTSHIENDYPSGPR |
| <i>BrCAGP67</i> | <i>Bra022410</i> | Pkinase                                    | MVLHKQALLLTFISVLGFHQLPSPTEAECPLDLTSSNFTLVASVCSTNADRAKCCRYMNA<br>FVAVSVSRYANHTADLGVAPELTSICITTISRTELYGIPTNATLFCGLGTKILVSYDCEGLT<br>TVTQMLQSPKFGDVSRNCELPFRCKSCLNSGITYIRSLVDRGNINIKMSTCRDATYAALAS<br>RVDSSSALELASCFNVSELTTPEFPLSPEASPVVADSPSGNDDLVLSPRRSHHGYHL<br>TVVPAIGIAVTVFSVMMLAVLIVLIQRKKRELDDDDSEGKDHNPCTKLPKVMMIHEGSSL<br>AFRKFSYREIRKATKEFSSVIGSGGFGTVHRGEFSNGLVAAVKRMKRSSEQADDEFCEIE<br>LLARLHHRHLVALKGFCCKNERFLVYEYMANGLTDHLHSTKPPLSWATRMKIAIDV                                                                                                                                                               |



|                 |                  |         |                                                                                                                                                                                                                                                                                                                                                                                                                                                                                                                                                                                                                                                                                                                                                                                                                                            |
|-----------------|------------------|---------|--------------------------------------------------------------------------------------------------------------------------------------------------------------------------------------------------------------------------------------------------------------------------------------------------------------------------------------------------------------------------------------------------------------------------------------------------------------------------------------------------------------------------------------------------------------------------------------------------------------------------------------------------------------------------------------------------------------------------------------------------------------------------------------------------------------------------------------------|
|                 |                  |         | <p>ANALEYLHLYCDPPLCHRDIKSSNILLDDNFVAKLADFGLAHASRDGVSCEFINTDIRG<br/> TPGYVDPEYVVTQELTEKSDVYSYGVVLEIITGRRVDEGRNRVEMSQPLLVSERSRVD<br/> LVDPRIKDCIDGEQLETVVAVVRWCTEKEGVARPSIKQVLRLLCESCDPLHMEAMAVEE<br/> HKGRSLRGGGDSGLASSSTTSRSHCSRSFLLLETGSPPNGLSF</p>                                                                                                                                                                                                                                                                                                                                                                                                                                                                                                                                                                                       |
| <i>BrCAGP68</i> | <i>Bra031115</i> | Pkinase | <p>MRNFAMHLLLFLLLHSPVCFARLFPFPFSRSKSHQMRFFHPLYPSLAPAPSPALAPKPNII<br/> PTPRHNKGGHYHHHRLVTSASPSSSHDCQQACVEPLTSSPLGSPCGCVFPMKVQLLLSV<br/> APFSIFPVTSELEIEVAAGTYLEQSQVKIMGASADTENQGKTVDINLVPLGEKFDSTTAT<br/> LIYQRFRRHKKVPLNESVFGDYEVTTHISYPGIPSSSPNDDIVDGAPTSTRGLPLTANFANRS<br/> QGIDFRTIAIIVLSGFVLALVLAGAIFVMQWNKVGMPTAVGPALASSMKKTPGAGFMF<br/> SSSVRSSGSDSLMSCMAMCALSVKTFTLSELEKATDKFSAKRVLGEGGFGRVYQGSMED<br/> GAEVAVKLLTRDNQNRDREFIAEVEMLSRLHHRNLVKLIGICIEGRTRCLIELVHNGSVE<br/> SHLHEGTLWDARLKIALGAARGLAYLHEDSNPRVIHRDFKASNVLLEDDFTPKVSDFG<br/> LAREATEGSQHISTRVMGTFGYVAPEYAMTGHLVKSQVYSYGVVLELLTGRRPVDMS<br/> QPSGEENLVTWARPLLANREGLEQLVDPTLAGTYDFDDMAKVAAIASMCVHLEVSHRP<br/> FMGEVVQALKLIYNDADETCGGDYCSKKESSVPDSADFKGDLAPSDSSWWNLTPRLRY<br/> GQASTFITMDYSSGPHHEEMENRPHSASSIPREGGLFLENRSGLRPVRSRRNYFRSRGSM<br/> SEHGSPSSSRHLWSGNGDWF</p> |
| <i>BrCAGP69</i> | Bra036461        | Pkinase | <p>MRNYAMLVLLLLLLHSLASFPVCFARLFPMSFPFTRSKSHQMRFFHPLYPPASSPAFSPN<br/> PSHIPTRHSAHHHQHRRWHLRPNVTAAPPPSNDCQQTCVEPLTSTPFGSPCGCVFPMKV<br/> QLLLSVAPFSIFPVTSELEIEVAAGTYLEQSQVKIMGASADSENQGKTVDNFNLVPLGEKF<br/> DNTTATLIYQRFRRHKKVPLNESVFGDYEVTTHISYPGIPSSSPYGDIVEGVPTASTDGLPVT</p>                                                                                                                                                                                                                                                                                                                                                                                                                                                                                                                                                               |

|                 |           |         |                                                                                                                                                                                                                                                                                                                                                                                                                                                                                                                                                                                                                                                                                                                                                                                                                                                                                                                                                                                                                                                                                                                                    |
|-----------------|-----------|---------|------------------------------------------------------------------------------------------------------------------------------------------------------------------------------------------------------------------------------------------------------------------------------------------------------------------------------------------------------------------------------------------------------------------------------------------------------------------------------------------------------------------------------------------------------------------------------------------------------------------------------------------------------------------------------------------------------------------------------------------------------------------------------------------------------------------------------------------------------------------------------------------------------------------------------------------------------------------------------------------------------------------------------------------------------------------------------------------------------------------------------------|
|                 |           |         | <p>             ANVANKSQGIGFRTIAIIVLSGFVLTLLLAGAIFIVRKWNKVGKSSTAV<sup>GP</sup>GLPPSMNKRL<br/>             GARSMFSSSARSSGSDSLMSSMATCALS VKTFTLSELHKATDK<sup>FSAKRVLGEGGFGRVY</sup><br/> <sup>HGSMEDGTEIAVKPLTRDNQNRDREFIAEVERLSRLHHRNLVKLIGICIEGRTRCLIELV</sup><br/> <sup>HNGSVESHLHEGTLWDARLKIALGAARGLAYLHEDSNPRVIHRDFKASNVLLEDDFTP</sup><br/> <sup>KVSDFGLAREATEGSEHISTRVMGTFGYVAPEYAMTGHLLVKSDVYSYGVVLELLAGR</sup><br/> <sup>KPVDMSQPSGEENLVTWARPLLANREGLEQLVDPRLAGTYDFDDMAKVAAIASMCVHQ</sup><br/> <sup>EVSHRPFMGEVVQALKLIYNDADETCGDYCSQKESSVPESAGDLAFSDSSWWNL</sup><sup>TP</sup>RRLR<br/>             YGQASTFITMDYSS<sup>GP</sup>PEEMENRPHSVSSIPREGGLYLPNRS<sup>GP</sup>LRPVRTRRNFFRLRGSM<br/>             SEHG<sup>GP</sup>SSSRHLWSGNGDWF           </p>                                                                                                                                                                                                                                                                                                                                                                       |
| <i>BrCAGP70</i> | Bra036687 | Pkinase | <p> <sup>MRNFAMMLLLLLLVHSLASFPLCFAARLFPMSLPFTRSKSHQIHFFHPRSNPSL</sup><sup>APAPSP</sup>AL<br/>             LPNQRHRGHHHHRRWHLRRNVTA<sup>SP</sup>SSHDCQQTCEPL<sup>TPTPFG</sup><sup>SP</sup>CGCVFPMKVQLL<br/>             LSV<sup>AP</sup>ISIFPVISELEIEVAAGTYLEQSQVKIMGASADSENQGKTVDINLVPLGDKFDKTT<br/>             ATLIYQFRHKKVPLNESVFGDYEVTHISYPG<sup>TPS</sup><sup>SP</sup>YGDIVEGVPSASAGGLPVTAIFAN<br/>             KSQGIGFRTIAIIVLSGFVLALVLAGAMFIVRKWNEVGRSSTAV<sup>GP</sup>ALPPSVNKRLGGGS<br/>             MFSSSARSSGSESLMSSMATCALS VKTFTLTELEKATDK<sup>FSAKRVLGEGGFGRVYQGNM</sup><br/> <sup>EDGTEIAVKLLTRDNQNRDREFIAEVEMLSRLHHRNLVKLIGICIEGRTRCLVYELVHNGS</sup><br/> <sup>IESHLHEGTLWDARLKIALGAARGLAYLHEDSNPRVIHRDFKASNVLLEDDFTP</sup><sup>KVSD</sup><br/> <sup>FGLAREATEGSQHVSTRVMGTFGYVAPEYAMTGHLLVKSDVYSYGVVLELLTGRKPV</sup><br/> <sup>DMSQPSGEENLVTWARPLLANREGLEQLVDPTLAGTYDFDDMAKVAAIASMCVHQEVS</sup><br/> <sup>HRPFMGEVVQALKLIYNDADETCGGDYCSQKESSVPDPADFKGDL</sup><sup>AP</sup>SDSSWWNL<sup>TPR</sup><br/>             LRYGQGSSFITMDYSS<sup>GP</sup>LEEMENRPHSASSIPRGGMFLPNRS<sup>GP</sup>LRPVRSRRDFFRLRGS           </p> |

|                 |                  |         |                                                                                                                                                                                                                                                                                                                                                                                                                                                                                                                                                                                                                                                                                                                                                                                                                                                                                                                                                                                                                                                                                          |
|-----------------|------------------|---------|------------------------------------------------------------------------------------------------------------------------------------------------------------------------------------------------------------------------------------------------------------------------------------------------------------------------------------------------------------------------------------------------------------------------------------------------------------------------------------------------------------------------------------------------------------------------------------------------------------------------------------------------------------------------------------------------------------------------------------------------------------------------------------------------------------------------------------------------------------------------------------------------------------------------------------------------------------------------------------------------------------------------------------------------------------------------------------------|
|                 |                  |         | MSEHGGPSSSRHLWSGNGD                                                                                                                                                                                                                                                                                                                                                                                                                                                                                                                                                                                                                                                                                                                                                                                                                                                                                                                                                                                                                                                                      |
| <i>BrCAGP71</i> | <i>Bra035635</i> | Pkinase | <p> MEILMFLVRIYLVSSVLVAASSSGLDLLSPSSSPPPLLPETSKGFGEVPISSESHKPGNAPP<br/> PKASLPSSPPLADVAAPPSYSSGTKAPNREPIVSVSPAPGPVSSPVSDIPPFPSVALPQPPTP<br/> SIVPPRNASNKKPVAPVASPPTISVDISPPVIPKLPHSRSPDSTSTAPSPPKFNGHSHHTSSS<br/> PPLNHLHHQEPKKIKDSPPPPCKMSNRPISSSMHPISIAPSPSPTQGLLPPLLKLFPTTHRQ<br/> NLIAKLSFISPKAFPLRSSSKPRKLPLQALPPPPNSDCSSTVCLDPYTNTPPGSPCGCVW<br/> PIQVELRLTMPLYDFFPMVSEFAREISAGVFMKQSQVRIMGANAATEQPKTILLIDLVLPL<br/> GDKFDNMTAMLTYQRFYRKKVYIDATTFGQYEVVYVRYPGLPVSPSGGMTVIDHEPFS<br/> RNNNNNGMVKKPFGVDVPKKMRRKEINGGSIIVVLSAAAFIGLCFVVVWFLAFRRGR<br/> ARRRLSTRASLPSTKPPGSVRSLTGSRFSSTLSFESSIAPLTLSAKTFTASEIVKATSNFAE<br/> SRVLGEGGFVKVYEGLFDDGTKVAVKVLKRDDQQGGREFLADEVMLSRLLHRLNVLNLI<br/> GICIEDNRNSLVYELIPNGSVESHLHGVDKESLPLDWEARLKIALGAARGLAYLHEDSNP<br/> RVIHRDFKSSNILLEQDFTPQVSDFGFLARNALDDEDNRHISTRVMGTFGYVAPEYAMTG<br/> HLLVKSDVYSYGVVLELLTGRKPVDMSQPPGQENLVSWTRSFLTREGLEAIIDQSLGQ<br/> PEIPFDSIAKVAAIASMCVQPEVSHRPFMGEVVQALKLV<sup>C</sup>NECDEAKELNSVTSLTHDDL<br/> GDDNGAESSCGGEGSRRMVRYPLLPSYDSEPGTERGLSVSEMFTGSGRLERVSNSGPLA<br/> SGGGKRFWQKMRRLSTGSLSEHGSSSLMVRSGSR </p> |
| <i>BrCAGP72</i> | <i>Bra002786</i> | Pkinase | <p> MEILMFLRLICLVSSVLVAA<sup>S</sup>PASGLDLLPPLSSPSP<sup>L</sup>PEASKGFQ<sup>A</sup>PITSQPSLPPLPN<br/> VAAPPSIS<sup>I</sup>IGDVADPPPADSAGSK<sup>A</sup>PAGEPIVSVPN<sup>A</sup>PATIPVKDLPGKSPPVASPPRD<br/> APKEPPFSGRVSPGPVS<sup>S</sup>PVSDIPPLPSVALPPPIPSVPPNNASNSHKPI<sup>A</sup>PVASPPTDISPP<br/> VHPVIPKLPS<sup>S</sup>PVPTS<sup>S</sup>PTRK<sup>S</sup>PIHPVFPIES<sup>A</sup>AAG<sup>S</sup>PDHPPSDNGGENK<sup>S</sup>PAPSNEAAK </p>                                                                                                                                                                                                                                                                                                                                                                                                                                                                                                                                                                                                                                                 |

|                 |                  |      |                                                                                                                                                                                                                                                                                                                                                                                                                                                                                                                                                                                                                                                                                                                                                                                                                                                                                                                            |
|-----------------|------------------|------|----------------------------------------------------------------------------------------------------------------------------------------------------------------------------------------------------------------------------------------------------------------------------------------------------------------------------------------------------------------------------------------------------------------------------------------------------------------------------------------------------------------------------------------------------------------------------------------------------------------------------------------------------------------------------------------------------------------------------------------------------------------------------------------------------------------------------------------------------------------------------------------------------------------------------|
|                 |                  |      | <p>PLPIFPHKASPPSVAPLAPKFNHSHHTSPSTTPPPDTTPSNVHRTSSSAPPPPSYHRHHQE<br/> RTKITNSPASSPPPPPTHLSPPKKPKRNGSVSPLSPHHARSPPVPSLISPVHPPVSSSMHRIS<br/> IAPSPSTQVPLRSSSRPSKSRKFPLGPPLPAPPPPPNSDCTSTVCLEPYTNTPPGSPCGC<br/> VWPIQVELRLSMALYDFFPMVSEFAREISAGVFMKQSQVRIMGANAASEQPKSIVLIDL<br/> VPLGDKFDNMTAMLTQYRFWSKKVQIFGQYDVIYVRYPGPLASPPVSGMTVIDQGPYPG<br/> GDNNGRAMKPLGVDVPKKMRKKQLTGETVAVIVLSAAAFIGLCFVIVWFLVFRRRRDQ<br/> RVSKRAPLARPSLPSLTKPSGSARSLTGSRLSSTLSFASSIAPFTLSAKTFTASEIVKATNNE<br/> AESRVLGEGGFGKVYEGLFDDGTKVAVKVLKRDDQGGREFLAEVEMLSRLHHRNLV<br/> NLIGICIEDNRSLVYELIPNGSVESHLHGVDKEASPLDWEARLKIALGAARGLAYLHED<br/> SSPRVIHRDFKSSNILLEHDFTPKVSDFGLARNALDDEDNRHISTRVMGTFGYVAPEYAM<br/> TGHLLVKSDVYSYGVVLELLTGRKPVDMTQPPGQENLVSWTRSLTSREGLEAIIDQSL<br/> GQPEIPFDSIAKVAAIASMCVQPEVSHRPFMGEVVQALKLVCNECDEAKELNSVTSLTQD<br/> ENRAESSCGGEGSGRMARYPLLPSYDSEPDTERGLSVSEMFTGSGRLERQSNSGPLASG<br/> RGKSFQKMRRLSTGSLSEHGASLMLRSGSR</p> |
| <i>BrCAGP73</i> | <i>Bra021861</i> | LysM | <p><u>MAARTLHALSTSPLFLLLLFAASSPTKA</u>QQPYVNNHQDCENRDFDNITNGFTCNGPS<br/> CRSYLTFWSLPPYNTPNSIATLLNASAAEIQTLNLTSLTTVIPTRRLVVIPTTCSCSGGGG<br/> FYQHNATYRLSGERQETYFSIANDTYQALSTCQAMMSQNPYGERNLTAGLNLVPLRCA<br/> CPTANQTAAGFRYLLTYLVAQGDSVSAIAEMFRSSTPAVSSGNELTSDNIFYFTPLLVLPLRT<br/> EPTRIVITPPSPTPPVATPPQSPVDPGSSSSSHKWIYIGVGIGAGLLLLISILSLYFCYYKR<br/> RSKTSSLIEQNKLTDSSTKQSLPTTSSRSPLAVYKDTTSGDQTETDKSKPEFGSWLMLGG<br/> RAERNKENNALPGKWAAFKVPQKPIVRAAASSFEVVFVDEKECTDERVQKKKKSETISS</p>                                                                                                                                                                                                                                                                                                                                                                                                                                     |

|                 |                  |      |                                                                                                                                                                                                                                                                                                                                                                                                                                                                     |
|-----------------|------------------|------|---------------------------------------------------------------------------------------------------------------------------------------------------------------------------------------------------------------------------------------------------------------------------------------------------------------------------------------------------------------------------------------------------------------------------------------------------------------------|
|                 |                  |      | SNVLPLNDGREIKK                                                                                                                                                                                                                                                                                                                                                                                                                                                      |
| <i>BrCAGP74</i> | <i>Bra008320</i> | LysM | <u>MKNPEKPILLFLILASTLASTATSKSTIEPCSTSSTCNSFLGYTLYTDLKVTELASLFQADP</u><br>VSILLSNSISTSYPDVENHVLPSHLFLKIPITCSCVDGIRKSTSTRYKTRTSDTLDSIAGSVY<br>GGLVSPEQIQVANPDIESLDVGTSLVIPLPCACFNGTDESLPAVYLSYVVVRGVDTMGGIAR<br>RFSTTVADLTNVNAMGAPDINPGDILAVPLLACGSNFPKYATDYGLIIPNGSYALTADHCV<br>QCSCALGSRSMYCEPASLEVSCSSMQCRNSKFMLGNITSQETSAGCKLTCTYNGFANG<br>TILTTLSRSLQPRCPGPPQLAPLIAPPDTPKELMFAPSPSPSPAPASDGVVSEGPSTVAA<br>APRGPTVASSSSIPGYPANGPAGSISIASCLTSYHSLVVVSFISFASYSSVILV |
| <i>BrCAGP75</i> | <i>Bra017956</i> | LysM | <u>MRNPENHILFLILASSLLFFTATSKSTIEPCSSNDTCNSLLGYTLYTDLKVSEVASLFQVDPI</u><br>SVLLANAIDISYPDVENHILPSKLFLKIPLTCSCVDGIRKSLSTRYKTRPSDTLGSIAHSVY<br>GGLVSAEQIQEANSVSDPSVLDVGTSLVVPLPCACFNGTDNSLPAVYLSYVVVRGVDTLA<br>GIARRYSTTVTDLNMNVNAMGAPDVSSGDILAVPLSACASNFPKYASDFGLIVPNGSYALA<br>AGHCVQCSCALGSRSLYCEPASLAVSCSSMQCRGNSLMLGNITVQQSSAGCNVTSCDYN<br>GFDNGTILTMLSRSLQPRCPGPQQFAPLLAPPDTLPKDIMYAPAPSPDFDGP GSVASSPRSS<br>IIPPGGSFPGNPANGPAGSISMATASSVSHFFVIFLISISSFSFVFSS     |
| <i>BrCAGP76</i> | <i>Bra016402</i> | LysM | <u>MKTPDKPIFYFLFLILASSSLFFTATTAKSTIEPCSSNDTCNSLLGYTLYTDLKVSEVASLFQ</u><br>VDPI SILLANAIDISFPDVENHILPSHLFLKIPLTCSCVDGIRKSVSTRYKTRPSDTLASIAGS<br>VYGGLVSAEQIQEANSVTDPSVLDVGTSLLVPLPCACFNGTDNSLPAVYLSYVVKGVDT<br>LAGIARRYETTVDLMNVNAMGAPDVSSGDILAVPLSACASNFPKYASDYGLIVPNGSY<br>ALAAGHCVQCSCALGSRSLYCEPASLAVSCSSMQCTNSNLMLGNITVQQSSAGCNVTTC<br>DYNGFANGTILTMLTRSLQPRCPGPQQFAPLLAPPDTPKDLMYAPAPSPDYDGP GSIAA                                                             |

|                 |           |           |                                                                                                                                                                                                                                                                                                                                                                                                                                                                                                                                                                                                                                                                                                                                                                                                                                                                                                                           |
|-----------------|-----------|-----------|---------------------------------------------------------------------------------------------------------------------------------------------------------------------------------------------------------------------------------------------------------------------------------------------------------------------------------------------------------------------------------------------------------------------------------------------------------------------------------------------------------------------------------------------------------------------------------------------------------------------------------------------------------------------------------------------------------------------------------------------------------------------------------------------------------------------------------------------------------------------------------------------------------------------------|
|                 |           |           | <u>SPGSSVIPPGGGSLPGNPANGPAGSISTAATVYSESYFFIMFLISISFVFSC</u>                                                                                                                                                                                                                                                                                                                                                                                                                                                                                                                                                                                                                                                                                                                                                                                                                                                               |
| <i>BrCAGP77</i> | Bra002362 | La domain | MMAETEGSLADDREVIGGFETKSPWKTTASPVETVDAPVMGAHSWPALADAQQPRPK<br>NLPTAAPPSKVIPTSIPAPAAQGVAGQGKSKGGGKGNPAHKNLSGRHSKPGPKSNQSGPPP<br>PPPPYVMHGVYPYHPSPFPPMVPPPHATGPDFPYAPYPPYPVPGAPVAESGNEKKAQASPL<br>PPVLPAPQGDHPGQPWQDQGRFGPRNMPHGAAAPRNFVRPPFMGQAPGFMVGP GSGFP<br>GPVYYLPVPPPGAIRGYPLRYAPYPVNQADSSGNFLEYFSALSPSLLVNWVAPHLAMLT<br>CVFLPFFSDENLQNDKYLISLMDKQEGWVPIKIIADFKRVKMMTMDVEFIVYALGYSSS<br>VEVQGEKIRRRDEWAKWVPASKRSDSEEKVGDNNDGDSPESTTSRDNSEKQSNDSKPTA<br>CSSEGAQPSRTDANGSDILKSSSSEQRNMDLSTDFSNTFLLDEEIDLEHKSPRRSGLSVC<br>KRIEDEDDDIAVDDHDHDIQKLVIVTQNSGRSDGTGISGTKAKNIPKELASTINDGLYYFE<br>QELKKNRPGRKKNNSHLDSRDGKVKGGGLNIKLGENSAANGGEEHSIRRKQNKGTHK<br>NQMAHVRRFFSGNTRNHGAVSESPSSSIGFFFGSTPPDSHGHRLSKLSSSPQYSLSGSSPP<br>VGSLPKSFPHFQHPSHQLLEENGFKQEKYLYRKRCNLNERKKLGCGCSEEMNHLRYFW<br>SYFLRETFVPSMYEDFQKFALEDAAGNYYYGLECLFRFYSGLEKQFDEDLYKDFEQLT<br>LDFYHKGNLYGLEKYWAFHHYRGQKEPIKKHPELEKLLKEEYRSLDDFRAKDSATSQK<br>ENKSH |
| <i>BrCAGP78</i> | Bra020153 | La        | MAETERSLADDREMIGHVTGSETKSPWKTAPIEPADAPVMGAHSWPALADAQQPRPKN<br>PPPPPPAAAAKSIPTSIPNHSQAVVTGHAASKAGGKANPAHKNNPPGRYSKPGSKSNQSG<br>PTPPAAAAYPMHAVPYHPPFPFPPMSYPTGPDFPYPLYPPYPIPGAPAAESGSEKPVQASPLP<br>PPPPQGEPRQHQRGFGPRNMPHGAPAGGPRNFVRPPYMGQGP GFMVGP GP GFGP VYYL<br>PGPPPGAIRGYPPRFGPYPGNQGPQALSP EQLDLDRHVTFRILIPFFSDENLQNDQYLISL                                                                                                                                                                                                                                                                                                                                                                                                                                                                                                                                                                                         |

|          |           |    |                                                                                                                                                                                                                                                                                                                                                                                                                                                                                                                                                                                               |
|----------|-----------|----|-----------------------------------------------------------------------------------------------------------------------------------------------------------------------------------------------------------------------------------------------------------------------------------------------------------------------------------------------------------------------------------------------------------------------------------------------------------------------------------------------------------------------------------------------------------------------------------------------|
|          |           |    | <p> MDEQGWVPIKIIADFKRVKMMTMDVEFIVYALRFSTSVQGDKIRKRDEWSKWVPAS<br/> KKSASEEKIGDNDKDSSSVTSKDNFKNSLKPTAFSSEGAQSSRTKSDNRKSLSDQQRKM<br/> DVLSSDFSNTFLLDEEMDLEHKSPRKSGLSMSKRIDDEDEDIAVDDHDIQKLVIVTQNSG<br/> RSDGTGISGTKAKNIPKELASTINDGLYYFEQELKKNRSGRRKNISHLDNRDGKVKAGG<br/> GLNTKLGENSAANGGSEEHSIRRKQSKGAHKHHTAHARRFFSGNMRNHGASLSSHTSE<br/> SPPSSSIGFFFGSTPPDNPGQRLSKLSSSPQCSLSGSPPVGS LPKSFPPFQHPSHQ LLEDNG<br/> FKQEKYLKYRKRC LNDRK LGGSGCSEEMNHLYRFWSYFLRET FVPSMYEDFQKFALED<br/> AAGNYNYGLECLFRFYSGLEKQFEEDLYKD FEQLTDFYHKGNLYGLEKYWAFHHYR<br/> GQKEPTIRKHPDLEKLLKEEYRSIADFRAKDPITSHKENKSH </p> |
| BrCAGP79 | Bra011647 | La | <p> MASAASSDSTSSSTSENQRSRPSPWSQIVRGESDPPTISSSAAAPSSPQHKAPIDPVPSAS<br/> TAPLAPVAGDVRSEESGAQGNAGKKPVWKRPSNGASSEVGGPVMGASSWPALSETTKA<br/> PSSKSSDSLKSLGDVASSSVVVTVTSQGNSNASAPAPKQGGRANPNPTPYNSRQRSFK<br/> RNNSASGSTANGTVSQGPVVETPSHNPSPRGQNQRNGSASQPHGGGSDNFSRDRSHRNQ<br/> NGNHHHHHQGHGRRNQEHGNQWNFSRSFNGRDGNNAHSQRGAPAFVRHQPPTMQSI<br/> PPQFMAAQPIQPFGGPVPFPPELASPYYPMPFIGPLSPGPVYYQVQDPPLNVKLQKQIQ<br/> YYFSEENLIRDTYLRGLMDDQGFVPLHVIAGFKKVAELTDSIQQIVEALQGSPFVEVQGD<br/> RIRKRYNWQHWLLPEDASLQFVNAVASGVRNLSIGQSSADPIGGPSSQLQPAGAENKAA<br/> SDGQQQFSVVNPVNNLNGSNGANR </p>                       |
| BrCAGP80 | Bra010506 | La | <p> MASAATNNSTSSPSLSPRHVSDYPRHVSESTRHVSSP TAAQSRQVSSPWTQIVRGESIPP<br/> PTIAAAATSKPPIEPIASAAPPAALLTVEAAAGEDKSEGNAGKKPAWSRPSNGASEIGPVM<br/> GASSWPALSEATKAPSNKPSSDSSIGDVPSSVSQGAASASVPAPKQAGRANPNPTPNHS </p>                                                                                                                                                                                                                                                                                                                                                                                    |

|                 |                  |           |                                                                                                                                                                                                                                                                                                                                                   |
|-----------------|------------------|-----------|---------------------------------------------------------------------------------------------------------------------------------------------------------------------------------------------------------------------------------------------------------------------------------------------------------------------------------------------------|
|                 |                  |           | RQRSFKRNGASGSTANGTASQPSAQGSLVEGTSHNPSPRGQNQKNGFASQPHGGADNQ<br>RDSHRNQNGNHHHQNHGGRRNQEHGNQNWNFHRSFNGRDGNASPRGAPAFVRYAP<br>PPPPPPVQAIPPQFMAAQSFSPVPYPPELAPPFYPGMPFVAPLSPGPVFYHVQDPPLNIKL<br>QNQIHYYFSEENLIKDTYLRDQMDDQGFAPLHVIAAGFRKVAELTDSIQEIVEALQGSFV<br>EVQGDGIRKRHNWQLWLIPSPQSVDASRVGNLSIGQSSAEPIGGSGSQLQPPEAENKA<br>VADGQPQSSGADPVSNRNGSGGANR |
| <i>BrCAGP81</i> | <i>Bra026880</i> | X8 domain | MRMFLGVLLLLALTSSSAIYCLCKDGIGDNGLQTSIDYACGTLADCNPIDKGACYQP<br>NTIKNHCDWAVNSYFQKAAQVPGSCNFSGTATTSQTTPSNLVTGCIYPSSASSAGSPPSTT<br>PPTGTTPTTNGTGGFTFPFGTPPAFGPTGTGGFTPSKAASSLVISSVFTLCFSSLAFLM                                                                                                                                                         |
| <i>BrCAGP82</i> | <i>Bra026878</i> | X8        | MRMFLALFLLLALTSSNATYCLCKDGTEDNALQASIDYVCGKLDCNPIRDKGACYQPD<br>TIKSHCDWAVNSYFQSQAQAPGSCVFTGTATTSQNPPSNLVTGCVYPSSPSSPGGCSPSTNG<br>ASSLVISPAFAICLSTLAFLM                                                                                                                                                                                             |
| <i>BrCAGP83</i> | <i>Bra026879</i> | X8        | MRMFLALFLLLALTSSNATYCLCKDGTEDNALQASIDYVCGKLDCNPILDKGACYQPN<br>TIKSHCDWAVNSYFQNVAAQAPGSCDFSGTATTSQNPSPYLVTGCVYPSSASSPGSLPSTTP<br>PPGTKQTNGTVTPTNGASVYQH                                                                                                                                                                                            |
| <i>BrCAGP84</i> | <i>Bra019700</i> | X8        | MKVFLGLLLLLALTTPSSAIYCLCNDGIGEKELQTAIDYACGTLADCNPIQEKGPCYQPIT<br>VKSHCDWAVNSYFQNAAQVSGSCNFSGTATTNLNPPSNLATGCIFPSSPSSAGTTPPTGPT<br>PPTGPTPPTGPAPGAPATPVGPTPPTPTNGTNTFPGAPLAPSPPGTGGFTPSNGASSLLISS<br>VLTLCFSSLAFL                                                                                                                                  |



|                 |           |                                        |                                                                                                                                                                                                                                                                                                                                                                                                                                                                                                                                                                                                                                                                                                            |
|-----------------|-----------|----------------------------------------|------------------------------------------------------------------------------------------------------------------------------------------------------------------------------------------------------------------------------------------------------------------------------------------------------------------------------------------------------------------------------------------------------------------------------------------------------------------------------------------------------------------------------------------------------------------------------------------------------------------------------------------------------------------------------------------------------------|
| <i>BrCAGP85</i> | Bra016724 | X8                                     | <u>MRVFLGLLLLLALTKSSSAI</u> <u>YCLCKDGVGEKELQTAIDYACGSLADCNPIHDNGPCYQPN</u><br><u>NIKSHCDWAVNSYFQKASQVSGSCNFSGTAT</u> TNQNPSSLNLTGCIYPSSASTT <u>SPT</u> GTTLT<br>NGT <u>TPAF</u> <u>GPT</u> GTGGFQGNASSLVISHVLTHCFSSLVFLWGS <u>SDVRLGFSHA</u>                                                                                                                                                                                                                                                                                                                                                                                                                                                              |
| <i>BrCAGP86</i> | Bra013621 | Hydrophobic<br>seed protein<br>domain  | <u>MAPHCSTKTIVFVLALISIFFLSETEA</u> QGR <u>SPP</u> RQPP <u>APRR</u> PPPPRRPPPPPLRPPPPPPFVCPP<br>CVCPPPVFPPNIPPPEI <u>TP</u> LEIQPPGV <u>TPP</u> ETEP <u>TP</u> QPEIPPPEIQPPEI <u>TPPEI</u> <u>SPP</u> ETEPK <u>TPPP</u><br>EIT <u>TP</u> LEIQPPGV <u>TPP</u> ETEP <u>TP</u> LPEIPPPEIQPPEI <u>TPPEI</u> <u>SPP</u> ETEPK <u>TPPPEI</u> <u>TPS</u> QVPPPEI <u>TPPE</u><br>IQPPKIEPPEI <u>TPPE</u> <u>SPPPKI</u> <u>SPP</u> QIEPSEI <u>TPPEI</u> <u>TPPEI</u> <u>TPPEI</u> <u>TPPEI</u> PPPKI <u>SPP</u> QIEPPEIT <u>SPEI</u> P<br>PPKI <u>SPPD</u> <u>TPPPSG</u> <u>TPPKQ</u> <u>SPLL</u> PPPNFQPPPPPLP <u>TCPRNAAQQRACANVRRYGNFLDFG</u><br><u>RAQPCCSLIRDLSDREAAACLCGFVQPPGQRRSPPPRNIFVLCRACGRRVPRGFMCP</u> |
| <i>BrCAGP87</i> | Bra016093 | Ring finger<br>domain and<br>PA domain | <u>MKMMMNRALVLLLLLLFHLTLSSLASAKVILIRNNITRSFDDIEAN</u> <u>FAP</u> SVKAAGEIGLL<br>YVAEPLDACSDLTNKPEQSSNGT <u>SPF</u> VLIVRGGCSFEDKVRKAQRAGFKAAIHDNEDRG<br><u>ILIAMAGNSGGIKIHAVFVTKETGDAL</u> KEFAGLSDTKVWLLPSFENSAWSIMAVSFISLLA<br>MSAVLATCFFVRRHRIRRRTSRSSRVREFHGMSRRLVKAMP SLIFSSVHEDNTTAF <u>TCAIC</u><br><u>LEDYSVGDKLRLLPCRHKFHAVCVDSWLT SWRTFCPVCK</u> RDARTANGEPPASE <u>TP</u> LLSS<br>AASSFRSSALSSFRSSAMLI <u>GP</u> SMGSLPTSISF <u>SP</u> AHASSSYIRQSFRSSLRR <u>SPP</u> ISVSRSS<br>MDLRQQGA <u>SPSP</u> SQRSYMA <u>SP</u> HSFNYPAM <u>SP</u> LNSRYM <u>SP</u> YRP <u>SP</u> SNA <u>SP</u> GMIGSSSNHPL<br>NPLRYSESAGTF <u>SP</u> YASANSLPDC                                                          |
| <i>BrCAGP88</i> | Bra036147 | COBRA                                  | <u>MGFLLPILLGVFLFTATPPSLSQFPPEIDPP</u> <u>APAPI</u> <u>SP</u> SEL CNGIFLSYTFILGRQIPPNDTTD<br>QPYRFESVLTVLNNGREELKEWRVFGVGFQHHEILTSASDAIIVNGTDLP <u>AP</u> VGNGTIFAGY<br>PVSDLKTAIQTAGDLKQMTATIELVGTQFMV <u>APP</u> AIPLPSNISLVNDGWSCPEPTAT <u>TP</u> LSKR<br>QITTCIRDPTFEVNTTTITDKFLPRQPGDLTIMYDVIRAYDQN <u>YLA</u> EVTMENHNPLGRL                                                                                                                                                                                                                                                                                                                                                                          |

|          |           |               |                                                                                                                                                                                                                                                                                                                                                                                                                                                         |
|----------|-----------|---------------|---------------------------------------------------------------------------------------------------------------------------------------------------------------------------------------------------------------------------------------------------------------------------------------------------------------------------------------------------------------------------------------------------------------------------------------------------------|
|          |           |               | DHWELSFDMREEFIQKMQGAYPTVVDATKCIFGPQSQIYTGLDFADVLTCCERRPIIVDL<br>PPTKAEDPVLGKIPSCCRNGTILPRTMDPSKSASIFTMQVAKMPPDFNRSALSPQNWRIK<br>GTLNPDYSCGPPVRVSPPLYPDPSGMPTNKTSEFASWQIVCNITHAKTETPKCCVSFSAFFN<br>DSIIPCNTCACGCVSETRRTCSEATPSLLIPPDALLVPFENRTSLTVAWNALKHKTIPNPMP<br>CGDNCGV SINWHIATDYRGGWTARITIFNWGEIDFPDWFLAVQMKKPAIRGFEEKAYSFN<br>ASLLSIEGGVNNTIFMEGLPGLEYLVAERDELDPKKKLRVPGKQQSVIQFSKKLTPGINVP<br>ERDGFPAKVIFNGEECLLPDVLPLPSGGRNGFDTMVLLCMMIFVVALVI |
| BrCAGP89 | Bra010350 | PsaE          | MAMMSASSVFLLPANVTAPAGASSRNSVSFLPMRNAGSRLVVRAADEAAPEPAPEGA<br>PATAAPAAAAATKPKPPPIGPKRGAKVKILRRESYWFKSVGSVVAVDQDPKTRYPVVVR<br>FAKVNYANISTNNYALDEIEEVKA                                                                                                                                                                                                                                                                                                    |
| BrCAGP90 | Bra011057 | PsaE          | MAMMSASSAFVLTSNVTASAGVSSSRNSVSFLPMRNAGSRLVVRAAEDAAPETSSSEGA<br>PATAVAPAAAAATKPKPPPIGPKRGSKVKILRRESYWFKNVGSVVAVDQDPKTRYPVVVR<br>FAKVNYANISTNNYALDEIEELKA                                                                                                                                                                                                                                                                                                 |
| BrCAGP91 | Bra037792 | Prolamin-like | MSPNTTSKRSLTFLTLSYLLSTVHIITVAEARNMQTMTVAAEHSGSGNLVDCWNAALEL<br>KSCTDEIVKFFMSRNGTAEPGVTGGIDKDCCGAIGLIGKECWSVMFTSLGLTTMEGNML<br>REYCDFEAEKLVFSPSPSPAPEALALSPVEITYPGLD                                                                                                                                                                                                                                                                                     |
| BrCAGP92 | Bra001249 | DOMON         | MASINSSLLLVLAVACFISPAISQTCSTQNVSTSFDS CMDLPVLDSYLHYTYDAANSSLSV<br>AFVATPPRSGDWVWVGINPTGTRMIGSQAFLAYSPRAGARPMVDTYNISSYNLTGRLTF<br>DFWNVRAESMPGNLIVIASVKVPMGANSVNQVWQIGGNVTNGRPGVHPMTPANMAS<br>TRVLRLTGSDAPSSAPGSAPGSAPGSVPGSAQGPTTPGASTTPGQAGGPENAGSMSTSVN                                                                                                                                                                                               |

|                 |                  |             |                                                                                                                                                                                                                                                                                                                                                                                                                                                                                                                                                                                                                                                                                                                                                                                                                                                                                                                                                                                                                                                                                                                            |
|-----------------|------------------|-------------|----------------------------------------------------------------------------------------------------------------------------------------------------------------------------------------------------------------------------------------------------------------------------------------------------------------------------------------------------------------------------------------------------------------------------------------------------------------------------------------------------------------------------------------------------------------------------------------------------------------------------------------------------------------------------------------------------------------------------------------------------------------------------------------------------------------------------------------------------------------------------------------------------------------------------------------------------------------------------------------------------------------------------------------------------------------------------------------------------------------------------|
|                 |                  |             | <u>FGVNEFGILVMLATIFIF</u>                                                                                                                                                                                                                                                                                                                                                                                                                                                                                                                                                                                                                                                                                                                                                                                                                                                                                                                                                                                                                                                                                                  |
| <i>BrCAGP93</i> | <i>Bra001259</i> | DOMON       | <u>MKLCSVSFISSLIALQLLPLFTIVNGQQATDSCNSTLPLKDLAFDSRHHQCVEVWRVQNY</u><br><u>ILRYARTVENTWSFILSAPDSSAYIGIGFSTTGQMVGSSAVVGWITSDSRSGSAKQYLLGG</u><br><u>KSPGEVIPDQGDLKIINGSLKIESVSSRLYLSFQLRAELPRERLLYARGPAEFFPS</u> <u>SP</u> DFRLR<br><u>EHQFMTTTTINYNT</u> <u>GP</u> ATF <u>GP</u> SM <u>SP</u> GP <u>GS</u> <u>SPP</u> <u>SP</u> SSAYGLSPSLLFLFMGLVALKFY                                                                                                                                                                                                                                                                                                                                                                                                                                                                                                                                                                                                                                                                                                                                                                     |
| <i>BrCAGP94</i> | <i>Bra006651</i> | Thioredoxin | <u>MTNLTHSLLFFSCSLSLIRVAIAGSRPAH</u> <u>GP</u> AYSNP <u>SAF</u> <u>SP</u> EAYDFFHPKSSLPDNNPPRNS<br>HSLPFL <u>SPSPSP</u> SKASNVEADTQGSKVSSDERISESRREEGRGETVGIVIGISFTALLLMGIY<br>FVIKKRLANLTRITVALKWRSASFSSAS <u>SP</u> SQLFSF <u>SP</u> SFAASSSDVDDDEDFSLEDLNDE <u>G</u><br><u>P</u> GEPLT <u>SP</u> VSLSQTNSTEEKPEDPEAYDDVEYGD <sup>FD</sup> SDLGFTDLVRKIHIFRPNISLIGGRQR<br>AVLRLKGD <u>GVGLAKVDATEENELTHQYSVQGVPTIILFFVDGEHKPYTGGR</u> TK                                                                                                                                                                                                                                                                                                                                                                                                                                                                                                                                                                                                                                                                                 |
| <i>BrCHAE1</i>  | <i>Bra013339</i> | LRR         | <u>MKTKKMAQIYALFVLHFTFLFSTGLSHSYSLASSNSDLS</u> <u>DK</u> EVHLIRQRQLLYRDDDFGD<br>RGENVVVDPSLVFENPRLRSAYVALQAWKQAILSDPNNFTTNWIGSDVCSYTG <sup>VY</sup> C <u>APA</u><br><u>P</u> DNPRIRTVAGIDLNHADIAGYLPQELGLL <u>TDLALFHVNSNRFCGTVPHRFNRLKLLFEL</u><br><u>DLSNNRFAGIFPAVILQLPSLKFLDLRFNEFE</u> <u>GP</u> VPRELFSKDLD <sup>AI</sup> FINHNRF <sup>RF</sup> ELPDNL<br>GD <u>SP</u> VSVIVVANNQFHGCIPTSLGDMKNLEEIIFMNNGFN <sup>S</sup> CLPSEIGRLKNVT <sup>VF</sup> DFSFN<br>ELVGSLPASTGGMVSLEQLNVAHNRFSGKIPASICQLPRLENFNFSYNFFTGEPPVCIGLPG<br>VDDRRNCIPARPAQR <u>SP</u> GQCAAFSLPPVNCASF <sup>G</sup> CGRSV <u>TPSP</u> RPPVVVP <u>SPPT</u> <u>TPSP</u> GG<br><u>SPPSP</u> SI <u>SP</u> AS <u>SPP</u> MMVPP <u>SP</u> IPAPV <u>SP</u> SSPPSI <u>GP</u> SPPSTPPSP <u>GP</u> SP <u>GP</u> VVPFPPP <u>SP</u> VYS<br>PPSPPPSTGH <u>SPPSP</u> SPPTKF <u>SPPSP</u> PPSAGHPPPSPPPST <u>GP</u> SPPPSPSTGYSPPPPPSTGY <u>S</u><br>PPPPPPSTGY <u>SPPSP</u> PPPPSTGY <u>SPPSP</u> PPSAGHCPP <u>SP</u> APPTY <u>SP</u> SPPPPPPTYYPPQPPQPS<br>QPPQF <u>SPPPT</u> YYYS <u>SPPPP</u> PHYWLPPPPHSPPPP <u>VY</u> HYPSPPPP <u>TP</u> VYSPPPPCIDHSPPPP |

|                |                  |     |                                                                                                                                                                                                                                                                                                                                                                                                                                                                                                                                                                                                                                                                                                                                                                                                                                                                                                                                                                                                                            |
|----------------|------------------|-----|----------------------------------------------------------------------------------------------------------------------------------------------------------------------------------------------------------------------------------------------------------------------------------------------------------------------------------------------------------------------------------------------------------------------------------------------------------------------------------------------------------------------------------------------------------------------------------------------------------------------------------------------------------------------------------------------------------------------------------------------------------------------------------------------------------------------------------------------------------------------------------------------------------------------------------------------------------------------------------------------------------------------------|
|                |                  |     | PPPTVHYSPPPSPVYYNSPPPPPSVHYSPPPSSPPPPVIHHSPPPPPPGYEGLPPIPGVSYASPPPPPPYY                                                                                                                                                                                                                                                                                                                                                                                                                                                                                                                                                                                                                                                                                                                                                                                                                                                                                                                                                    |
| <i>BrCHAE2</i> | <i>Bra002969</i> | FH2 | <p> <u>MGNQNRGGLLLWFILISGFLVISSLEVNL</u>DKDEPFLTPFVAPSTGMVNEPVVESSWAKSC<br/> WQSDSCVKEAVAVFNLCLPASRELFGFKHSHLKQTLLGCIQEQAKLNGHNLKYLKLLPY<br/> LLDTPRRNLASRPVSLSPSPSPSPPKRSRVPPTRSRSPSPSNSFFPPSRSPPPAKKTASSSAK<br/> RKEEHEKTIIIAVVSTAVSTFLLAALLFLCCTRVCVGKSGGGRKNDERPLLSLSSSDHSVSGSS<br/> INYGGSIKGGNQSFNIYSNQGKMSSFDGNSNSDTSDSLEERLSHEGMRTHGLPPLKPPPGR<br/> TSSAHLGKPPSGKVEPLPHEPPKFLKVSSNKGSHHTQPPVPPPPMPSSAGPPRPPPPAPPPG<br/> SGGPKPPPPPGPKGPPPPPGPKGPRPPPPMSLGPKAPRPSSGPAKSPSDDDGAPKTKLKPF<br/> FWDKVQANPEHSMVWNDIRSGSFQFNEEMIESLFGYAAADKNKNDKKGAAGQAAPQF<br/> VQILEPKKGQNL SILLRALNATTEEVCDALREGNELPVEFIQTLLKMAPTPEEELKLRLYC<br/> GEIAQLGTAERFLKAVVDIPFAFKRLEALLFMCTLYEEIAFVKESFQTLEVACQELRG SRL<br/> FLKLL EAVLKTGNRMNDGTFRGGAQAFKLD TLLKLADVKGTDGKT TLLQFVIQEIIRTE<br/> GRR AARTIRESQSFSSVKTEDLMAEEASEEMEDSYRNLGLQKVSGLSSELEHVKKSANI<br/> DADGLTGTVLKMGHALSKARDFVNSEMSSGEVSGFREALEDFIQNAEGSIVSILGEEKRI<br/> MALVKSTGDYFHGKAGKDEGLRLFVIVRDFLIILDKICKEVKGKPVKMARKQGSTASAS<br/> SETPRQAPSLDPKQKLFP AITERRMDQSSSDSD </p> |
| <i>BrCHAE3</i> | <i>Bra017734</i> | La  | <p> MASSATSTNPNSSSSSAAQSRRPSPQVSSPWTLIVRGGDSVPTIAAAAAAPSPPQSKPPIEP<br/> IADASPPPAAGEEKPEGNAGKKPVWKRPSNGGAAASEVGPVMGASSWPALSVAANKSS<br/> SDSLKSLGDVAPSPPPVLVSQGIANASVPSSASKPAGRANPNPTPNNSRQRSFKRNGASGS<br/> SANGTASQPSVQGSLAESPSHNPSPRGQNQRNGFPSHTHGGSGADNVSQRDSYRNQNG </p>                                                                                                                                                                                                                                                                                                                                                                                                                                                                                                                                                                                                                                                                                                                                                 |

|                |           |                             |                                                                                                                                                                                                                                                                                                                                                                                                                                                                                                            |
|----------------|-----------|-----------------------------|------------------------------------------------------------------------------------------------------------------------------------------------------------------------------------------------------------------------------------------------------------------------------------------------------------------------------------------------------------------------------------------------------------------------------------------------------------------------------------------------------------|
|                |           |                             | YHHQSHGGRRNQEHNQNWTFSSFNDRDGNASQSRGAPPAFVRHPPPPPLQTIPPQF<br>MAAHPFASPLPFPELASQYYQRMFPVAPLSPGPVFYHVQDPPLNIKLQKQIHYYFSEEN<br>LIKDTYLRRQMDDQGFVPLPIAGFNKVAELTESVQQIAEALQGSFVVEVQGERIRKRY<br>WQHWLIPQDPSSPQSVGAVASRVGNLALGESSAGPNGGSSSQLQPAGAENKAVSDGQQQ<br>SPGGVPGSNRNGSDGANR                                                                                                                                                                                                                                 |
| <i>BrCHAE4</i> | Bra027650 | GNK2                        | MVTFCNPSDNFTQTSSYQANRDLSSSLRDSSSLGTYSNATVGRSPNKVHGMFLCRGDT<br>TAASCSDCVQTATVEIATNCSLNKAAVIYYEECMVRYANVSFFSVLEVRPSIVLYSLRSAP<br>NSDTFNETLADKFNQLILNVSSSLVPYFVEDQERVTAEGSYEFESLVQCSPGLDRFNCT<br>VCLRFALLRVSTCCGSPSSALIFTPKCLLRYQTSALSSPPPLSPSPPPPPSPALFSPPTLSQ<br>PPPPPLVFTRPQDVPSLSGSFSNVIKGNKIFGRIVITMAALVFALVNL                                                                                                                                                                                           |
| <i>BrCHAE5</i> | Bra020846 | Hydrophobic<br>seed protein | MAPKGVNTNLVFLALISILFIGQTKAQGRPSPRLPPPPPLQRPSSPPPLLLVCPPCVCPILS<br>PPPPNTPPPTPQTSPITPVAPPPQTPPSNLPPAFPPNNPSATTPPQTSTPPPQTPSVSPITPTI<br>SPQLPPSNIPTPTTEEILPVRPSVPPSQTPPVHSPIFSPKSPSILPPQVPSVPLPITPSETPTSTIPP<br>QTPLQSPPQTPPTTPPQTPLAPPPNTQPSSPPLNFQPPPPPPQTPPSPPNSQPPSVPLPITPP<br>QTPPQSPPQTPPTTPPETPPVSPPNTPPLSPPLNLFHPPPPPPQTPPSPPNSQPPSVPLPITPP<br>QTPPQSPPQTPPTTPPETPPVIPPNTPPLSPPLNLFQPPPPPPQTPPSPPNSQPPSAPTCPRNA<br>SQLRACSNITRRFGNFDLDFGRAQPCCSLIRDLSDAEVAACLCGLVQPQSQRYSTPSRNIFI<br>CRACGRPMPRGFMCP |
| <i>BrCHAE6</i> | Bra038210 | Root cap                    | MDLAKHTTLQMLGFILLASLVLTMAPPGLTKPSHATCKIKKYKHHCYNLEHVCPKFCPD<br>TCHVECASCKPICGPA SPGDDGGDTPPTPVPPVSPPPAPVPPVSPPPVTPTPSYPTPTDPL<br>PPAPVSPPPAPVPPVSPPPPTPTPYVPSTPPVSPPPSPPTDVPSTPPSSPPPTPTPAVPS                                                                                                                                                                                                                                                                                                              |

|                |           |          |                                                                                                                                                                                                                                                                                                                                                                                                                                                                                                                                                                                                                                                                                    |
|----------------|-----------|----------|------------------------------------------------------------------------------------------------------------------------------------------------------------------------------------------------------------------------------------------------------------------------------------------------------------------------------------------------------------------------------------------------------------------------------------------------------------------------------------------------------------------------------------------------------------------------------------------------------------------------------------------------------------------------------------|
|                |           |          | <p>TPSSPPPPSPTPAVLTPPHVTPTPTTPAVPSPPDVTPPTPTSPVSPDTPTAPLPPYSPPATPAPS</p> <p>VPSTPTTPSSPTTPGSTPTTPTPSVPTPSPSVPVPSAPNSPPYVPPSSPTPTTPSDGEAGAGV</p> <p>RRARCKKKGSPCYGVEYSCPSACPRSCEVDCVTCKPLCNCCKPGSVCQDPRFIGGDGLT</p> <p>FYFHGKKDSNFCLISDPNLHINAHFIGKRRPGMARDFTWVQSIAVLFGTHRIFYVGALKTA</p> <p>TWDDSVDRISASFDGNVISLPQLDGATWTSSPGVYPQVSVKRVNADTNNIEVEVEGLLKI</p> <p>TARVVSITMEDSRIHGYDVKEDDCLAHLDLGFKFQDLSDNVDGVLGQTYRPNYVSRVKI</p> <p><u>GVHMPVMGGDREFQTTGLFAPDCSAARF</u>IGNGGRNGGWSKMELPEM<u>SCASGVGGKGV</u></p> <p><u>VCKR</u></p>                                                                                                                                                   |
| <i>BrCHAE7</i> | Bra022423 | Root cap | <p><u>MALATRVQILGCILLASLALTMA</u>TPPGIAKNPSHATCKIKKYKHCYNLEHVCPKFCPDS</p> <p>CHVECASCKPICGPPSPGSDDDDGEDDGGYTTPAPVPPVSPPPTPTPAVPSTTPPVSPPPP</p> <p>PPPTPTPAVPSPPPPVSPPPPPPTPTPAGASPTTPVSPPPPSPTPAVPSTPTSSSPPPPTPTPAVP</p> <p>TPTPTPSVPSPPGTPTAPVPPYSPPATPTPSIPSTPTSPGSTTPYVPPSSPTPTTPSDGEAGA</p> <p>GVRRARCKKKGSPCYGVEYSCPADCPRSCEVDCVTCKPLCNCCKPGSVCQDPRFIGGD</p> <p>GLTFYFHGKKDSNFCLISDSNLHINAHFIGKRRPGMARDFTWVQSIAILFGPHRLYVGAL</p> <p>KTSTWDDSVDRISASFDGHVISLPQLDGATWTSSSLGVYPQVSVKRVNADTNNLEVEVE</p> <p>GMLKITARVVPITVEDSRIHGYNVTEDDCLAHLDLGFKFQDLSDNVDGVLGQTYRSNYV</p> <p><u>SRVKIGVHMPVMGGDREFQTSGLFEPDCSAARF</u>TGNRGSNGGRSKMELPEM<u>SCASGVG</u></p> <p><u>GKGVVCKR</u></p> |
| <i>BrHAE1</i>  | Bra030020 | -        | <p><u>MKSSIVLVAAAILCIVAFPTATVGKNLRFGLKPTQGWPHPSEASTNQMFMTSQKFNYGD</u></p> <p>SKVWRCTYSNGSAPAISISI SPTPTMPSPSTPTTPSPSPPTPKTSPPPPTPSPPPTSKKAPSP</p> <p>SPPPPPPTPSLPPPTTKVPSPPPPTLSPPPPTTKASSPPLPKPSLPPP TPKKTPSPPPPTPSLP</p>                                                                                                                                                                                                                                                                                                                                                                                                                                                         |

|               |                  |   |                                                                                                                                                                                                                                                      |
|---------------|------------------|---|------------------------------------------------------------------------------------------------------------------------------------------------------------------------------------------------------------------------------------------------------|
|               |                  |   | PPTPKKSPSPSPSSDDESSSPSQPSNPPQEHHHHHEFPLEHIGRCYRNMGQVGFRCGQMAI<br>SFYTRLFKVSKYCCNLIVNMKNECDDVIWGYFYDPHFVPLVRCTCHVSF                                                                                                                                   |
| <i>BrHAE2</i> | <i>Bra009880</i> | - | MVSLNLSFALVFILAILFTFAEANYSRKLLQTPNTYQPAYSPPSPTPVYSPPVNPPPTPTVT<br>YPPPTPAYPPPVALPPPAPINSPPPPAPIIPPLKANPSPQAYRAFYRKSPPPPSGKPWWLL                                                                                                                      |
| <i>BrHAE3</i> | <i>Bra014023</i> | - | MKSLIILIVAHFCIIVSPTTTMGGWPKPSEVSNEEKLVTGQAQPHLYAGKFNFGDSKVV<br>KCTYNNGSGVAISISYPSPQPPSQKPPTPSSPPTPKMAPPLPKPSPPRPSPKKSPPPPKPSSP<br>PPTPKKSPPPPKPSPPPTPKKSPPPPKPSPPPTPKMSPPSPTPSPPRPSPKKSPNPSSLTPNE<br>SPPPAKTSILIIHSPPPHPIPAQSPPKEPTTPSTQWPPYRNWNPLGL |

<sup>a</sup> Italics indicate a newly identified BrAGP that is highly similar to AGP-like amino acid sequences predicted in *Brassica rapa* by Ma et al. (2017). XXX, N-terminal signal peptides predicted by SignalP 5.0 Server; XXX, conserved domains predicted by HMMER; XXX, [Ala/Ser/Thr/Gly]-Pro; XXX, [Ala/Ser/Thr/Gly]-Pro-X(0,10)-[Ala/Ser/Thr/Gly]-Pro (two consecutive Pros are not separated by more than 11 amino acid residues); XXX, [A/S/T/G]-P<sub>2-4</sub>; XXX,  $\geq 2$  SP<sub>3-5</sub>; XXX, PPVK/T and KKPCPP; XXX, GPI-anchor addition signal predicted by the GPI-SOM or the BIG-PI Plant Predictor. The conserved residues (His, Cys, His and Gln/Met) involved in Cu binding and Cys residues involved in the disulfide linkage are marked with Grey and dark blue in the amino acid sequences of the plastocyanin-like (PCNL) domains of the BrPLAs, respectively. The eight conserved cysteine residues were marked with dark green in the non-specific lipid transfer protein 2 (nsLTP2) domains of the BrXYLPs.
